# Supplementary material for: Biomarkers of sickle cell nephropathy in Senegal
Source: PubMed Central journal article supplement (PMC9678278; doi:10.1371/journal.pone.0273745), 2022-11-21

# PLOS ONE

## BIOMARKERS OF SICKLE CELL NEPHROPATHY IN SENEGAL

--Manuscript Draft--

|                                                                                                                                                                                                                                                                                                                                                                                                                                                                                              |                                                                                                                                                                                                                                                                                                                                                                                                                                                                                                                                                                                                                                                                                                                                                                                                                                                                                                                                                                                                                                                                                                                                                                                                                                                                                                                                                                                                                                                                                                                                                                                                                                                                                                                                                                                                                                                                                                                                                                                |
|----------------------------------------------------------------------------------------------------------------------------------------------------------------------------------------------------------------------------------------------------------------------------------------------------------------------------------------------------------------------------------------------------------------------------------------------------------------------------------------------|--------------------------------------------------------------------------------------------------------------------------------------------------------------------------------------------------------------------------------------------------------------------------------------------------------------------------------------------------------------------------------------------------------------------------------------------------------------------------------------------------------------------------------------------------------------------------------------------------------------------------------------------------------------------------------------------------------------------------------------------------------------------------------------------------------------------------------------------------------------------------------------------------------------------------------------------------------------------------------------------------------------------------------------------------------------------------------------------------------------------------------------------------------------------------------------------------------------------------------------------------------------------------------------------------------------------------------------------------------------------------------------------------------------------------------------------------------------------------------------------------------------------------------------------------------------------------------------------------------------------------------------------------------------------------------------------------------------------------------------------------------------------------------------------------------------------------------------------------------------------------------------------------------------------------------------------------------------------------------|
| <b>Manuscript Number:</b>                                                                                                                                                                                                                                                                                                                                                                                                                                                                    | PONE-D-21-14690                                                                                                                                                                                                                                                                                                                                                                                                                                                                                                                                                                                                                                                                                                                                                                                                                                                                                                                                                                                                                                                                                                                                                                                                                                                                                                                                                                                                                                                                                                                                                                                                                                                                                                                                                                                                                                                                                                                                                                |
| <b>Article Type:</b>                                                                                                                                                                                                                                                                                                                                                                                                                                                                         | Research Article                                                                                                                                                                                                                                                                                                                                                                                                                                                                                                                                                                                                                                                                                                                                                                                                                                                                                                                                                                                                                                                                                                                                                                                                                                                                                                                                                                                                                                                                                                                                                                                                                                                                                                                                                                                                                                                                                                                                                               |
| <b>Full Title:</b>                                                                                                                                                                                                                                                                                                                                                                                                                                                                           | BIOMARKERS OF SICKLE CELL NEPHROPATHY IN SENEGAL                                                                                                                                                                                                                                                                                                                                                                                                                                                                                                                                                                                                                                                                                                                                                                                                                                                                                                                                                                                                                                                                                                                                                                                                                                                                                                                                                                                                                                                                                                                                                                                                                                                                                                                                                                                                                                                                                                                               |
| <b>Short Title:</b>                                                                                                                                                                                                                                                                                                                                                                                                                                                                          | BIOMARKERS OF SICKLE CELL NEPHROPATHY IN SENEGAL                                                                                                                                                                                                                                                                                                                                                                                                                                                                                                                                                                                                                                                                                                                                                                                                                                                                                                                                                                                                                                                                                                                                                                                                                                                                                                                                                                                                                                                                                                                                                                                                                                                                                                                                                                                                                                                                                                                               |
| <b>Corresponding Author:</b>                                                                                                                                                                                                                                                                                                                                                                                                                                                                 | El Hadji Malick NDOUR, M.D.<br>Université Cheikh Anta Diop Faculté de Medecine Pharmacie d'Odonto-Stomatologie:<br>Universite Cheikh Anta Diop Faculte de Medecine de Pharmacie et d'Odontologie<br>Dakar, SENEGAL                                                                                                                                                                                                                                                                                                                                                                                                                                                                                                                                                                                                                                                                                                                                                                                                                                                                                                                                                                                                                                                                                                                                                                                                                                                                                                                                                                                                                                                                                                                                                                                                                                                                                                                                                             |
| <b>Keywords:</b>                                                                                                                                                                                                                                                                                                                                                                                                                                                                             | Sicile cell disease; Kidney disease; Molecular diagnostics                                                                                                                                                                                                                                                                                                                                                                                                                                                                                                                                                                                                                                                                                                                                                                                                                                                                                                                                                                                                                                                                                                                                                                                                                                                                                                                                                                                                                                                                                                                                                                                                                                                                                                                                                                                                                                                                                                                     |
| <b>Abstract:</b>                                                                                                                                                                                                                                                                                                                                                                                                                                                                             | Sickle cell anemia (SCA) is caused by a single point variation in the $\beta$ -globin gene ( HBB ): c.20A> T (p.Glu7Val), in homozygous state. SCA is characterized by sickling of red blood cells in small blood vessels which leads to a range of multiorgan complications, including kidney dysfunctions. The aim of this case-control study was to identify sickle cell nephropathy biomarkers in a group of patients living with SCA from Senegal. A total of 163 patients living with SCA and 177 ethno-linguistic matched controls were investigated. Biological phenotyping included evaluation of glycemia, glucosuria, albuminuria, proteinuria, tubular proteinuria, creatininemia, creatininuria, urine specific gravity and glomerular filtration rate. Descriptive statistics of biomarkers were performed using the $\chi^2$ – test, with the significance level set at $p < 0.05$ . Patients with SCA had a median age of 20 years (range 4 to 57) with a sex ratio (male/female) of 1.14. The median age of the control participants was 29 years (range: 4 – 77), with 34 % being male. The following proportions of abnormal biological indices were observed in SCA patients versus (vs.) controls, as follows: hyposthenuria: 35.3 % vs. 5.2 % ( $p < 0.001$ ) ; glomerular hyperfiltration: 47.29 % vs. 19.75 % ( $p < 0.001$ ), chronic renal failure: 5.43 % vs. 3.82 % ( $p = 0.62$ ) ; microalbuminuria: 42.38 % vs. 5.78 % ( $p < 0.001$ ) ; proteinuria: 39.33 % vs. 4.62 % ( $p < 0.001$ ); tubular proteinuria: 40.97 % vs. 4.73 % ( $p < 0.001$ ) and microglucosuria: 22.5 % vs. 5.1 % ( $p < 0.001$ ). The present study showed a relatively high proportion of SCA nephropathy among patients living with SCA in Senegal. Microglucosuria, proteinuria, tubular proteinuria, microalbuminuria, hyposthenuria and glomerular hyperfiltration were the most prevalent biomarkers of nephropathy in this group of Senegalese patients with SCA. |
| <b>Order of Authors:</b>                                                                                                                                                                                                                                                                                                                                                                                                                                                                     | El Hadji Malick NDOUR, M.D.                                                                                                                                                                                                                                                                                                                                                                                                                                                                                                                                                                                                                                                                                                                                                                                                                                                                                                                                                                                                                                                                                                                                                                                                                                                                                                                                                                                                                                                                                                                                                                                                                                                                                                                                                                                                                                                                                                                                                    |
| <b>Additional Information:</b>                                                                                                                                                                                                                                                                                                                                                                                                                                                               |                                                                                                                                                                                                                                                                                                                                                                                                                                                                                                                                                                                                                                                                                                                                                                                                                                                                                                                                                                                                                                                                                                                                                                                                                                                                                                                                                                                                                                                                                                                                                                                                                                                                                                                                                                                                                                                                                                                                                                                |
| <b>Question</b>                                                                                                                                                                                                                                                                                                                                                                                                                                                                              | <b>Response</b>                                                                                                                                                                                                                                                                                                                                                                                                                                                                                                                                                                                                                                                                                                                                                                                                                                                                                                                                                                                                                                                                                                                                                                                                                                                                                                                                                                                                                                                                                                                                                                                                                                                                                                                                                                                                                                                                                                                                                                |
| <b>Financial Disclosure</b><br><br>Enter a financial disclosure statement that describes the sources of funding for the work included in this submission. Review the <a href="#">submission guidelines</a> for detailed requirements. View published research articles from <a href="#">PLOS ONE</a> for specific examples.<br><br>This statement is required for submission and <b>will appear in the published article</b> if the submission is accepted. Please make sure it is accurate. | The clinical chemistry experiments of the study were in part funded by The African Center of Excellence for Maternal and Child Health «Centre d'Excellence Africain pour la Santé de la Mère et de l'Enfant (CEA-SAMEF, <a href="http://ceasamef.sn">http://ceasamef.sn</a> , No 000099/2018/JCM/KND) », Cheikh Anta Diop University of Dakar, Senegal.<br>The molecular experiments of the study were funded by SADaCC ( <a href="https://www.sickleinafrica.org">https://www.sickleinafrica.org</a> ) at the Division of Human Genetics, Faculty for Health Sciences, University of Cape Town, South Africa.<br>The funders had no role in study design, data collection and analysis, decision to publish, or preparation of the manuscript.                                                                                                                                                                                                                                                                                                                                                                                                                                                                                                                                                                                                                                                                                                                                                                                                                                                                                                                                                                                                                                                                                                                                                                                                                                |

**Unfunded studies**

Enter: *The author(s) received no specific funding for this work.*

**Funded studies**

Enter a statement with the following details:

- Initials of the authors who received each award
- Grant numbers awarded to each author
- The full name of each funder
- URL of each funder website
- Did the sponsors or funders play any role in the study design, data collection and analysis, decision to publish, or preparation of the manuscript?
- **NO** - Include this sentence at the end of your statement: *The funders had no role in study design, data collection and analysis, decision to publish, or preparation of the manuscript.*
- **YES** - Specify the role(s) played.

\* typeset

**Competing Interests**

Use the instructions below to enter a competing interest statement for this submission. On behalf of all authors, disclose any [competing interests](#) that could be perceived to bias this work—acknowledging all financial support and any other relevant financial or non-financial competing interests.

This statement is **required** for submission and **will appear in the published article** if the submission is accepted. Please make sure it is accurate and that any funding sources listed in your Funding Information later in the submission form are also declared in your Financial Disclosure statement.

View published research articles from [PLOS ONE](#) for specific examples.

The authors have declared that no competing interests exist.

**NO authors have competing interests**

Enter: *The authors have declared that no competing interests exist.*

**Authors with competing interests**

Enter competing interest details beginning with this statement:

*I have read the journal's policy and the authors of this manuscript have the following competing interests: [insert competing interests here]*

\* typeset

**Ethics Statement**

Enter an ethics statement for this submission. This statement is required if the study involved:

- Human participants
- Human specimens or tissue
- Vertebrate animals or cephalopods
- Vertebrate embryos or tissues
- Field research

Write "N/A" if the submission does not require an ethics statement.

General guidance is provided below. Consult the [submission guidelines](#) for detailed instructions. **Make sure that all information entered here is included in the Methods section of the manuscript.**

The study protocol complied with the ethical guidelines of the Helsinki Declaration and was approved by the Research Ethics Committee from the Cheikh Anta Diop University of Dakar (0312/2018/CER/UCAD) and by the Faculty of Health Sciences Human Research Ethics Committee from the University of Cape Town (HREC RE: 661/2015). Participation was subject to the free and informed consent of subjects who were at least 18 years old and parents or guardians of those under 18 years.

**Format for specific study types**

**Human Subject Research (involving human participants and/or tissue)**

- Give the name of the institutional review board or ethics committee that approved the study
- Include the approval number and/or a statement indicating approval of this research
- Indicate the form of consent obtained (written/oral) or the reason that consent was not obtained (e.g. the data were analyzed anonymously)

**Animal Research (involving vertebrate animals, embryos or tissues)**

- Provide the name of the Institutional Animal Care and Use Committee (IACUC) or other relevant ethics board that reviewed the study protocol, and indicate whether they approved this research or granted a formal waiver of ethical approval
- Include an approval number if one was obtained
- If the study involved *non-human primates*, add *additional details* about animal welfare and steps taken to ameliorate suffering
- If anesthesia, euthanasia, or any kind of animal sacrifice is part of the study, include briefly which substances and/or methods were applied

**Field Research**

Include the following details if this study involves the collection of plant, animal, or other materials from a natural setting:

- Field permit number
- Name of the institution or relevant body that granted permission

**Data Availability**

Authors are required to make all data underlying the findings described fully available, without restriction, and from the time of publication. PLOS allows rare exceptions to address legal and ethical concerns. See the [PLOS Data Policy](#) and [FAQ](#) for detailed information.

Yes - all data are fully available without restriction

A Data Availability Statement describing where the data can be found is required at submission. Your answers to this question constitute the Data Availability Statement and **will be published in the article**, if accepted.

**Important:** Stating 'data available on request from the author' is not sufficient. If your data are only available upon request, select 'No' for the first question and explain your exceptional situation in the text box.

Do the authors confirm that all data underlying the findings described in their manuscript are fully available without restriction?

**Describe where the data may be found in full sentences. If you are copying our sample text, replace any instances of XXX with the appropriate details.**

- If the data are **held or will be held in a public repository**, include URLs, accession numbers or DOIs. If this information will only be available after acceptance, indicate this by ticking the box below. For example: *All XXX files are available from the XXX database (accession number(s) XXX, XXX).*
- If the data are all contained **within the manuscript and/or Supporting Information files**, enter the following: *All relevant data are within the manuscript and its Supporting Information files.*
- If neither of these applies but you are able to provide **details of access elsewhere**, with or without limitations, please do so. For example:

*Data cannot be shared publicly because of [XXX]. Data are available from the XXX Institutional Data Access / Ethics Committee (contact via XXX) for researchers who meet the criteria for access to confidential data.*

*The data underlying the results presented in the study are available from (include the name of the third party*

All relevant data are within the manuscript and its Supporting Information files.

|                                                                                                                                                                                                                                         |                                                                                                                                     |
|-----------------------------------------------------------------------------------------------------------------------------------------------------------------------------------------------------------------------------------------|-------------------------------------------------------------------------------------------------------------------------------------|
| <p><i>and contact information or URL).</i></p> <ul style="list-style-type: none"><li>• This text is appropriate if the data are owned by a third party and authors do not have permission to share the data.</li></ul> <p>* typeset</p> |                                                                                                                                     |
| Additional data availability information:                                                                                                                                                                                               | Tick here if your circumstances are not covered by the questions above and you need the journal's help to make your data available. |

## Research article

### BIOMARKERS OF SICKLE CELL NEPHROPATHY IN SENEGAL

El Hadji Malick Ndour<sup>1,2\*</sup>, Khuthala Mnika<sup>3</sup>, Fatou Guèye Tall<sup>1,2</sup>, Moussa SECK<sup>4</sup>, Indou Dème Ly<sup>2</sup>, Victoria Nembaware<sup>3</sup>, Gaston Kuzamunu Mazandu<sup>3</sup>, Hélène Ange Thérèse Sagna-Bassène<sup>2</sup>, Rokhaya Dione<sup>2</sup>, Aliou Abdoulaye Ndongo<sup>5</sup>, Jean Pascal Demba Diop<sup>6</sup>, Nènè Oumou kesso Barry<sup>1</sup>, Moustapha Djité<sup>1</sup> Rokhaya Ndiaye Diallo<sup>6</sup>, Papa Madièye Guèye<sup>1</sup>, Saliou Diop<sup>5</sup>, Ibrahima Diagne<sup>7</sup>, Aynina Cissé<sup>1</sup>, Ambroise Wonkam<sup>3</sup>, Philomène Lopez Sall<sup>1,2</sup>

#### Affiliations:

1. Laboratoire de Biochimie Pharmaceutique, Faculté de Médecine, de Pharmacie et d'Odontologie, Université Cheikh Anta Diop, Dakar, Sénégal
2. Centre Hospitalier National d'Enfants Albert Royer, Dakar, Sénégal
3. Division of Human Genetics, Department of Pathology, Faculty of Health Sciences, University of Cape Town, Cape Town, South Africa
4. Centre National de Transfusion Sanguine, Dakar, Sénégal
5. Service de Pédiatrie de l'Hôpital Aristide Le Dantec, Dakar, Sénégal
6. Service de Génétique Humaine, Faculté de Médecine, de Pharmacie et d'Odontologie, Université Cheikh Anta Diop, Dakar, Sénégal
7. Unité de Formation et de Recherche des Sciences de la Santé, Université Gaston Berger, Saint-Louis, Sénégal

#### Corresponding author :

Email : [elhadjimalickndour@yahoo.fr](mailto:elhadjimalickndour@yahoo.fr) (EHMN)

## Abstract

Sickle cell anemia (SCA) is caused by a single point variation in the  $\beta$ -globin gene (*HBB*): c.20A>T (p.Glu7Val), in homozygous state. SCA is characterized by sickling of red blood cells in small blood vessels which leads to a range of multiorgan complications, including kidney dysfunctions. The aim of this case-control study was to identify sickle cell nephropathy biomarkers in a group of patients living with SCA from Senegal. A total of 163 patients living with SCA and 177 ethno-linguistic matched controls were investigated. Biological phenotyping included evaluation of glycemia, glucosuria, albuminuria, proteinuria, tubular proteinuria, creatininemia, creatininuria, urine specific gravity and glomerular filtration rate. Descriptive statistics of biomarkers were performed using the  $\chi^2$  – test, with the significance level set at  $p < 0.05$ . Patients with SCA had a median age of 20 years (range 4 to 57) with a sex ratio (male/female) of 1.14. The median age of the control participants was 29 years (range: 4 – 77), with 34 % being male. The following proportions of abnormal biological indices were observed in SCA patients versus (vs.) controls, as follows: hyposthenuria: 35.3% vs. 5.2% ( $p < 10^{-3}$ ); glomerular hyperfiltration: 47.29% vs. 19.75% ( $p < 10^{-3}$ ), chronic renal failure: 5.43% vs. 3.82% ( $p = 6.2 \cdot 10^{-1}$ ); microalbuminuria: 42.38 % vs. 5.78% ( $p < 10^{-3}$ ); proteinuria: 39.33% vs. 4.62% ( $p < 10^{-3}$ ); tubular proteinuria: 40.97% vs. 4.73% ( $p < 10^{-3}$ ) and microglucosuria: 22.5% vs. 5.1% ( $p < 10^{-3}$ ). The present study showed a relatively high proportion of SCA nephropathy among patients living with SCA in Senegal. Microglucosuria, proteinuria, tubular proteinuria, microalbuminuria, hyposthenuria and glomerular hyperfiltration were the most prevalent biomarkers of nephropathy in this group of Senegalese patients with SCA.



## **Blurb**

Sickle cell anemia is a monogenic recessive autosomal inherited hemoglobinopathy which can lead to kidney disorders. This study aims at identifying relevant biomarkers for screening nephropathy in sickle cell anemia patients from Senegal. A subset of Senegalese with sickle cell anemia and ethno-linguistic matched controls both of them free from diabetes were investigated. Biological indices of renal abnormalities were evaluated and an unexpected relatively high prevalence of nephropathy among sickle cell anemia patients was revealed. Microglucosuria, proteinuria, tubular proteinuria, microalbuminuria, hyposthenuria and glomerular hyperfiltration were the most prevalent biomarkers of nephropathy in this group of Senegalese with sickle cell anemia.

**Keywords:** Sickle Cell Disease, Sickle Cell Nephropathy, Senegal haplotype, albuminuria, glomerular filtration rate, glucosuria, proteinuria

## **List of abbreviations**

SCD: Sickle cell disease

NM\_000518.5:c.20A>T: substitution of A to T at nucleotide position 20 of the complementary DNA

A: adenine

T: Thymine

NP\_000509.1:p.Glu7Val: replacement of glutamic acid by valine at position 7 of the protein ( $\beta$ -globin chain)

Glu : Glutamic acid

Val : Valine

SCA: Sickle cell anemia

SNP : single nucleotide polymorphism

C : Cytosine

GFR: glomerular filtration rate

USG: urine specific gravity

ESRD: End-stage renal disease

SS: SCA patients free from diabetes

AA non-DT: control participants with no detectable SCA and diabetes

CNTS: National Blood Transfusion Center

USAD: Ambulatory Care Unit for Children and Adolescents with Sickle Cell Disease

CHEAR: Albert Royer National University Children's Hospital

CKD-EPI: Chronic Kidney Disease – EPIdemiology

UPCR: urinary protein to creatinine ratio

UACR: urinary albumin to creatinine ratio

UGCR: urinary glucose to creatinine ratio

GHF: Glomerular hyperfiltration

RFLP: restriction fragment length polymorphism

PCR: polymerase chain reaction

OR: odds ratio

USA: United State of America

mOsm/kgH<sub>2</sub>O: urine osmolality

## List of Human Genes

### HGNC data for HBB

**Approved symbol** HBB

**Approved name** hemoglobin subunit beta

**Locus type** gene with protein product

**HGNC ID** HGNC: 4827

**Symbol status** Approved

**Previous names** hemoglobin, beta

**Alias symbols** CD113t-C, beta-globin

**Chromosomal location** 11p15.4

**Gene groups** : [Hemoglobin subunits](#)

### HGNC data for HBG2

**Approved symbol** HBG2

**Approved name** hemoglobin subunit gamma 2

**Locus type** gene with protein product

**HGNC ID** HGNC: 4832

**Symbol status** Approved

**Previous names** hemoglobin, gamma G

**Alias symbols** HBG-T1

**Chromosomal location** 11p15.4

**Gene groups** [Hemoglobin subunits](#)

## 1 **Introduction**

2 Sickle cell disease (SCD) is an inherited hemoglobinopathy with autosomal recessive  
3 transmission caused by a single nucleotide substitution NM\_000518.5:c.20A>T of the  $\beta$ -globin  
4 gene (*HBB*-rs334), located on the short arm of chromosome 11 (11p15.4) [1, 2]. The variation  
5 results in an amino-acid replacement NP\_000509.1:p.Glu7Val of the  $\beta$ -globin chain of  
6 tetrameric hemoglobin ( $\alpha_2\beta_2$ ) in adults NM\_000518.5 (*HBB*):c.20A>T(p.Glu7Val) [1, 2].  
7 Sickle cell anemia (SCA) refers to the disease which results from the homozygous expression  
8 of the  $\beta^S$  allele ( $\beta^S\beta^S$  genotype) [3].

9 SCD is the most common monogenic disease in the world [4]. It is estimated that 305,800  
10 children in the world, of whom 85% in sub-Saharan Africa, are born with SCD each year, and  
11 this number could reach 404,200 in 2050 [4]. Senegal is a country in sub-Saharan West Africa  
12 with a population of approximately 16,209,125, of which up to 2% are SCD patients [5, 6].  
13 Three centers specializing in lifelong medical treatment for SCD patients have been developed,  
14 but there is no universal newborns screening yet and very few patients are exposed to  
15 hydroxycarbamide. There is no universal medical insurance coverage and care for SCD patients  
16 is thus paid for by family members in this developing country where poverty affects from 24.9%  
17 of the population living in Dakar the capital to 77.5% of the rural population of the region of  
18 Kolda [7]. Therefore, the financial burden of the necessary medical care often cannot be met  
19 and patients suffer from multiple SCD complications albeit the vast majority of the patients  
20 express the Senegal haplotype (XmnI-rs7482144) bearing the C>T single nucleotide  
21 polymorphism (SNP) at position -158 of the  $\gamma$ -globin gene (*HBG2*:g.-158C>T or  
22 NM\_000184.2(*HBG2*):c.-211C>T) which is associated with higher fetal hemoglobin (HbF)  
23 levels known to result in a less severe clinical expression of SCD [2,3].

24 Patients living with SCD may exhibit multiple organ damage including renal abnormalities  
25 that may be structural and/or functional [8]. These glomerular and/or tubular renal damages are  
26 age dependent [8]. In early childhood, renal abnormalities are mainly glomerular hyperfiltration  
27 characterized by increased glomerular filtration rate (GFR), and loss of urinary concentration  
28 ability through the Henle's loop of juxtaglomerular nephrons resulting in hyposthenuria (*i.e.* a  
29 decrease in urine specific gravity (USG) are described [8]. In childhood, microalbuminuria is  
30 the most observed abnormality in SCD patients (8). In adulthood, macroalbuminuria  
31 (proteinuria) begins to develop and may be associated with renal failure (*i.e.* a decrease in GFR)  
32 [8]. End-stage renal disease (ESRD) requiring hemodialysis and / or kidney transplantation  
33 occurs in 4-18% of SCD patients [9]. The average survival time after the onset of ESRD is 4  
34 years, and 40% of SCD patients die after 20 months of dialysis [10].

35 However, in Africa, particularly in Senegal, only a few studies have focused on renal  
36 manifestations of SCD, mainly on albuminuria and glomerular hyperfiltration and the available  
37 studies have been reported in patients with very low proportion of Senegal haplotype [11-14].  
38 It is anticipated that early diagnosis in patients with one or more renal manifestations would  
39 allow early therapeutic intervention that could delay the onset of ESRD and increase the life  
40 expectancy of SCD patients [12].

41 Thus, the main objective of this study was to identify nephropathy biomarkers that could be  
42 used for anticipatory guidance, and affordable routine clinical assessment of Senegalese  
43 patients living with sickle cell anemia (SCA).

#### 44 **Results**

45 Among 394 recruited subjects 164 (41.62%) was *HBB*-rs334 T (sickle mutation) in  
46 homozygous state, 49 (12.44%) in heterozygous state and 181 (45.94%) was *HBB*-rs334 A in  
47 homozygous state. One of the 164  $\beta^S/\beta^S$  patients and four of the 181  $\beta^A/\beta^A$  one were excluded

48 from the study because of hyperglycemia as well as the 49  $\beta^S/\beta^A$  subjects. A total of 163 SCA  
49 patients and 177 ethno-~~linguistic~~ matched controls free from diabetes were therefore included  
50 in our series. Among the selected SCA patients 79 (63.71%) was Senegal haplotype and 45  
51 (27.61%) were matched in age and sex with 45 of the 177 controls. Tables 1 and 2 summarize  
52 anthropometric and biochemical characteristics of the study participants. The median age of  
53 controls was 29 years [range 4 - 77] with 90% (n = 160) of this population ranging between the  
54 ages of 10 and 61. Women were more represented than men in this control group with a sex  
55 ratio of 1.95 "Table 1". SCA patients had a median age of 20 years [range 4 - 57] and 90% (n  
56 = 147) of them were between 6 and 38 years of age. The sex ratio (F/M) was 1.14 in the SCA  
57 group "Table 2".

58

59

60

61

62

63

64

65

66

67

68

69

**Table 1:** Description of anthropometric and biochemical parameters of controls

| Controls free from sickle cell anemia and diabetes<br>(n = 177) |                         |                                  |              |
|-----------------------------------------------------------------|-------------------------|----------------------------------|--------------|
|                                                                 | Median (min - max)      | 5 – 95 <sup>th</sup> percentiles | Observations |
| Age, years                                                      | 29 (4 - 77)             | 10 – 61                          | 168          |
| Sex ratio, F/M                                                  | 1.95                    | xxx                              | 174          |
| BMI, kg/m <sup>2</sup>                                          | 22.38 (10.56 – 49.61)   | 13.52 – 34.02                    | 162          |
| SBP, mmHg                                                       | 12 (9 -16)              | 10 – 14                          | 100          |
| DBP, mmHg                                                       | 7 (5 - 9)               | 6 – 8                            | 100          |
| Hb, g/dl                                                        | 13.3 (7.4 – 18.2)       | 10.2 – 16.2                      | 170          |
| Glycemia, mg/dl                                                 | 84 (70 - 110)           | 73 - 98                          | 170          |
| BUN, mg/dl                                                      | 8 (2.5 – 31.5)          | 5 - 14                           | 162          |
| Creatininemia, mg/dl                                            | 0.78 (0.23 – 7.36)      | 0.38 – 1.4                       | 166          |
| Creatininuria, mg/dl                                            | 227 (22 - 886)          | 76 - 486                         | 174          |
| GFR, ml/min/1.73m <sup>2</sup>                                  | 114.41 (10.85 – 200.37) | 68.28 – 160.60                   | 157          |
| UACR, mg/g                                                      | 6.52 (1.28 – 139.07)    | 2.62 – 32.43                     | 173          |
| UPCR, mg/g                                                      | 44.74 (9.21 – 530.27)   | 15.07 - 181.48                   | 173          |
| UGCR, mg/g                                                      | 0 (0 - 52)              | 0 - 20                           | 176          |
| USG                                                             | 1.020 (1.004 – 1.035)   | 1.010 – 1.028                    | 154          |

SBP, mmHg (x 0.134 kPa). DBP, mmHg (x 0.134 kPa). Hb, g/dl (x 0.6206 mmol/l). Glycemia, mg/dl (x 0.0555 mmol/l). BUN, mg/dl (x 0.357 mmol/l). Creatininemia, mg/dl (x 88.4 μmol/l). Creatininuria, mg/dl (x 88.4 μmol/l). UACR, mg/g (x 0.113 mg/mmol). UPCR, mg/g (x 0.113 mg/mmol). UGCR, mg/g (x 0.625 μmol/mmol).

n: effectif. Min: minimum. Max: maximum. BMI: body mass index. SBP: systolic blood pressure. DBP: diastolic blood pressure. Hb: hemoglobin. BUN: blood urea nitrogen. GFR: glomerular filtration rate was determined using Schwartz formula in children and adolescents and CKD-EPI formula in adults. UPCR: urinary protein /creatinine ratio. UACR: urinary albumin/creatinine ratio. UGCR: urinary glucose/creatinine ratio. USG: urine specific gravity.



**Table 2:** Description of anthropometric and biochemical parameters of sickle cell anemia patients

| Sickle cell anemia patients free from diabetes<br>(n = 163) |                          |                                  |              |
|-------------------------------------------------------------|--------------------------|----------------------------------|--------------|
|                                                             | Median (min - max)       | 5 – 95 <sup>th</sup> percentiles | Observations |
| Age, years                                                  | 20 (4 - 57)              | 6 - 38                           | 144          |
| Sex ratio, F/M                                              | 1.14                     | xxx                              | 156          |
| BMI, kg/m <sup>2</sup>                                      | 18 (11.24 – 33.71)       | 13.15 – 26.04                    | 128          |
| SBP, mmHg                                                   | 11 (8 - 14)              | 9 - 14                           | 101          |
| DBP, mmHg                                                   | 7 (4 - 11)               | 5 - 8                            | 101          |
| Hb, g/dl                                                    | 8.4 (5.1 – 11.6)         | 6.6 - 11                         | 148          |
| Glycemia, mg/dl                                             | 85 (60 - 108)            | 71 - 101                         | 152          |
| BUN, mg/dl                                                  | 6.5 (2.5 – 54.5)         | 4 – 10.5                         | 143          |
| Creatininemia, mg/dl                                        | 0.57 (0.13 – 1.58)       | 0.27 – 0.99                      | 151          |
| Creatininuria, mg/dl                                        | 88 (16 - 679)            | 37 - 233                         | 152          |
| GFR, ml/min/1.73m <sup>2</sup>                              | 136.96 (38.31 – 407.84)  | 58.51 -196.80                    | 129          |
| UACR, mg/g                                                  | 25.67 (2.64 – 328.65)    | 6.86 – 122.63                    | 151          |
| UPCR, mg/g                                                  | 156.67 (17.24 – 2957.84) | 29.41 – 1388.76                  | 150          |
| UGCR, mg/g                                                  | 5 (0 - 7370)             | 0 - 193                          | 151          |
| USG                                                         | 1.012 (1.001 – 1.025)    | 1.007 – 1.020                    | 153          |

SBP, mmHg (x 0.134 kPa). DBP, mmHg (x 0.134 kPa). Hb, g/dl (x 0.6206 mmol/l). Glycemia, mg/dl (x 0.0555 mmol/l). BUN, mg/dl (x 0.357 mmol/l). Creatininemia, mg/dl (x 88.4 µmol/l). Creatininuria, mg/dl (x 88.4 µmol/l). UACR, mg/g (x 0.113 mg/mmol). UPCR, mg/g (x 0.113 mg/mmol). RGCU, mg/g (x 0.625 µmol/mmol).

n: effectif. Min: minimum. Max: maximum. BMI: body mass index. SBP: systolic blood pressure. DBP: diastolic blood pressure. Hb: hemoglobin. BUN: blood urea nitrogen. GFR: glomerular filtration rate was determined using Schwartz formula in children and adolescents and CKD-EPI formula in adults. UPCR: urinary protein /creatinine ratio. UACR: urinary albumin/creatinine ratio. UGCR: urinary glucose/creatinine ratio. USG: urine specific gravity.

72 The median creatininemia observed in 166 controls was 0.78 mg/dl (68.95  $\mu$ mol/l) [range 0.23  
73 – 7.36 (20.33 - 650.62)] with 90% (n = 150) of this group having creatininemia between 0.38  
74 (33.59  $\mu$ mol/l) and 1.4 mg/dl (123.76  $\mu$ mol/l) “Table 1”. The reference intervals of  
75 creatininemia obtained from the controls of our series were therefore 0.78 mg/dl (68.95  $\mu$ mol/l)  
76 [range 0.38-1.4 (33.59 - 123.76)] “Table 1” [15]. The mean creatininemia level was  
77 significantly reduced in SCA compared to controls [0.59 $\pm$ 0.23 (52.15 $\pm$ 20.33) versus 0.86 $\pm$ 0.60  
78 (76.02 $\pm$ 53.04) mg/dl ( $\mu$ mol/l); p < 10<sup>-4</sup>] “Table 3”. The median glomerular filtration rate (GFR)  
79 was 136.96 ml/min /1.73m<sup>2</sup> [range 58.51- 196.80] for SCA patients and 114.41 ml/min/1.73m<sup>2</sup>  
80 [range 68.28 – 160.60] for controls “Tables 1, 2”. The median urinary specific gravity (USG)  
81 was 1.012 [range: 1.007 - 1.020] and USG was  $\leq$  1.015 in 90.2% (n = 138) of SCA patients  
82 “Tables 2, 4”. In controls, the 5<sup>th</sup> percentile of USG was 1.010 “Table 1”. Hyposthenuria could  
83 therefore be defined by an USG  $\leq$  1.010 [15]. The 95<sup>th</sup> percentile for glucosuria, albuminuria,  
84 and proteinuria were respectively 20 mg/g (12.5  $\mu$ mol/mmol), 32.43 mg/g (3.66 mg/mmol) and  
85 181.48 mg/g (20.51 mg/mmol) in the control group “Table 1”. Microglucosuria could therefore  
86 be defined by an UGCR  $\geq$  20 mg/g (12.5  $\mu$ mol/mmol) but could remain low and undetectable  
87 by urine test strips.

88

89

90

91

92

93

94

**Table 3:** Comparison of means of anthropometric and biochemical parameters between sickle cell anemia patients and unmatched controls and then age- and sex-matched controls.

|                        | SS          | AA non-DT   | p-value              | SS         | AA non DT  | p-value               |
|------------------------|-------------|-------------|----------------------|------------|------------|-----------------------|
|                        | (n = 163)   | (n = 177)   |                      | (n = 45)   | (n = 45)   |                       |
|                        | Mean±SD     | Mean±SD     |                      | Mean±SD    | Mean±SD    |                       |
|                        | or          | or          |                      | or         | or         |                       |
|                        | % (n)       | % (n)       |                      | % (n)      | % (n)      |                       |
| Age, years             | 20.4±10.2   | 32.1±15.3   | < 10 <sup>-4</sup>   | 21.4±10.4  | 21.4±10.4  | 1                     |
| Sex, female            | 53.21% (83) | 66.09%(115) |                      | 64.44%(29) | 64.44%(29) |                       |
| Sex, male              | 46.79% (73) | 33.91% (59) | 1.7.10 <sup>-2</sup> | 35.56%(16) | 35.56%(16) | 1                     |
| BMI, kg/m <sup>2</sup> | 19.1± 6.8   | 22.9±6.8    | < 10 <sup>-4</sup>   | 19.6±7.5   | 21,5±6.8   | 7.9.10 <sup>-2</sup>  |
| SBP, mmHg              | 11.2±1.30   | 11.7±1.35   | 4.1.10 <sup>-3</sup> | 11.2±1.15  | 11.8±1.01  | 7.6.10 <sup>-2</sup>  |
| DBP, mmHg              | 6.9±1.12    | 7.25±0.8    | 8.5.10 <sup>-3</sup> | 7.25±1.06  | 7.35±0.79  | 3.96.10 <sup>-1</sup> |
| Hb, g/dl               | 8.57±1.47   | 13.38±1.8   | < 10 <sup>-4</sup>   | 8.69±1.43  | 13.05±1.87 | < 10 <sup>-4</sup>    |
| Glycemia, mg/dl        | 85±9        | 86±8        | 7.1.10 <sup>-1</sup> | 85±7       | 86±10      | 4.47.10 <sup>-1</sup> |
| BUN, mg/dl             | 7±4.5       | 9±3.5       | < 10 <sup>-4</sup>   | 6.5±2      | 8.5±2.5    | 3.10 <sup>-4</sup>    |
| Creatininemia, mg/dl   | 0.59±0.23   | 0.86±0.60   | < 10 <sup>-4</sup>   | 0.58±0.21  | 0.75±0.32  | 9.5.10 <sup>-3</sup>  |

SBP, mmHg (x 0.134 kPa). DBP, mmHg (x 0.134 kPa). Hb, g/dl (x 0.6206 mmol/l). Glycemia, mg/dl (x 0.0555 mmol/l). BUN, mg/dl (x 0.357 mmol/l). Creatininemia, mg/dl (x 88.4 μmol/l).

SS: sickle cell anemia patients free from diabetes. AA non-DT: controls free from sickle cell anemia and diabetes. n: effectif ; BMI: body mass index. SBP: systolic blood pressure. DBP: diastolic blood pressure. Hb: hemoglobin. BUN : blood urea nitrogen.

95

96 In the SCA group, the prevalence was 35.3% for hyposthenuria, 47.29% for glomerular  
97 hyperfiltration, 5.43% for chronic renal failure, 42.38% for microalbuminuria, 39.33% for  
98 proteinuria, 0% for glomerular hyperproteinuria, 40.97% for tubular hyperproteinuria and  
99 22.5% for microglucosuria “Table 4”. In the control group, the prevalence was 5.2% for  
100 hyposthenuria, 19.75% for glomerular hyperfiltration, 3.82% for chronic renal failure, 5.78%  
101 for microalbuminuria, 4.62% for proteinuria, and 0% for glomerular hyperproteinuria, 4.73%

102 for tubular hyperproteinuria and 5.1% for microglucosuria “Table 4”. Comparison of  
103 prevalence between SCA patients and unmatched controls showed that SCA was associated  
104 with renal injury biomarkers ( $p < 0.05$ ) except for CRF ( $p = 6.2 \times 10^{-1}$ ), and glomerular  
105 hyperproteinuria “Table 4”. This association was strong and SCA appeared as a risk factor of  
106 renal insult biomarkers disruption if the odds ratio (OR) was taken into account “Table 4”. The  
107 association between SCA and these renal disorders were confirmed by comparing the  
108 prevalence of these nephropathy biomarkers between SCA patients and controls matched in age  
109 and sex “Table 5”.

110

111

112

113

114

115

116

117

118

119

120

121

**Table 4:** Comparison of disturbances of nephropathy biomarkers between sickle cell anemia patients and controls

|                                                    | SS<br>(n = 163) | AA non-DT<br>(n = 177) |                      |                    |
|----------------------------------------------------|-----------------|------------------------|----------------------|--------------------|
|                                                    | % (n)           | % (n)                  | p-value              | Odds ratio         |
| USG ≤ 1.010                                        | 35.3%(54)       | 5.2%(8)                |                      |                    |
| USG > 1.010                                        | 64.7%(99)       | 94.8%(146)             | < 10 <sup>-3</sup>   | 9.95 [4.43-25.12]  |
| GFR > 140 ml/min/1.73 m <sup>2</sup>               | 47.29%(61)      | 19.75%(31)             | < 10 <sup>-3</sup>   | 3.64 [2 – 6.64]    |
| GFR < 60 ml/min/1.73 m <sup>2</sup>                | 5.43% (7)       | 3.82%(6)               | 6.2.10 <sup>-1</sup> |                    |
| 60 ≤ GFR < 90 ml/min/1.73 m <sup>2</sup>           | 11.63%(15)      | 22.29%(35)             |                      |                    |
| 90 ≤ GFR ≤ 140 ml/min/1.73 m <sup>2</sup>          | 35.66%(46)      | 54.14%(85)             |                      |                    |
| UACR ≥ 30 mg/g                                     | 42.38%(64)      | 5.78%(10)              |                      |                    |
| UACR < 30 mg/g                                     | 57.62%(87)      | 94.22%(163)            | < 10 <sup>-3</sup>   | 11.99 [5.71-27.33] |
| UPCR > 200 mg/g                                    | 39.33%(59)      | 4.62%(8)               |                      |                    |
| UPCR ≤ 200 mg/g                                    | 60.67%(91)      | 95.38%(165)            | < 10 <sup>-3</sup>   | 13.37 [5.97-33.59] |
| UPCR > 200 mg/g with $\frac{UACR}{UPCR} \geq 59\%$ | 0               | 0                      |                      |                    |
| UPCR ≤ 200 mg/g with $\frac{UACR}{UPCR} \geq 59\%$ | 6               | 4                      | NA                   | NA                 |
| UPCR > 200 mg/g with $\frac{UACR}{UPCR} < 59\%$    | 40.97%(59)      | 4.73%(8)               |                      |                    |
| UPCR ≤ 200 mg/g with $\frac{UACR}{UPCR} < 59\%$    | 59.03%(85)      | 95.27%(161)            | < 10 <sup>-3</sup>   | 13.97 [6.22-35.15] |
| UGCR ≥ 20 mg/g                                     | 22.5%(34)       | 5.1%(9)                |                      |                    |
| UGCR < 20 mg/g                                     | 77.5%(117)      | 94.9%(167)             | < 10 <sup>-3</sup>   | 5.39 [2.41-13.21]  |

UACR, mg/g (x 0.113 mg/mmol). UPCR, mg/g (x 0.113 mg/mmol). UGCR, mg/g (x 0.625 μmol/mmol).

SS : sickle cell anemia patients free from diabetes. AA non-DT : controls free from sickle cell anemia and diabetes. n : effectif. USG : urine specific gravity. GFR : glomerular filtration rate was determined using Schwartz formula in children and adolescents and CKD-EPI formula in adults. UPCR : urinary protein /creatinine ratio. UACR : urinary albumin/creatinine ratio. RACU/RPCU : urinary albumine/total protein ratio. UGCR : urinary glucose/creatinine ratio. NA : not applicable.

**Table 5:** Comparison of disturbances of nephropathy biomarkers between sickle cell anemia patients and age- and sex-matched controls

|                                                    | SS         | AA non-DT  | p-value              | Odds ratio          |
|----------------------------------------------------|------------|------------|----------------------|---------------------|
|                                                    | (n = 45)   | (n = 45)   |                      |                     |
|                                                    | % (n)      | % (n)      |                      |                     |
| USG ≤ 1.010                                        | 35.71%(15) | 2.44 %(1)  |                      |                     |
| USG > 1.010                                        | 64.29%(27) | 97.56%(40) | < 10 <sup>-3</sup>   | 22 [3 - 958]        |
| GFR > 140 ml/min/1.73 m <sup>2</sup>               | 45.24%(19) | 21.43%(9)  | 4.9.10 <sup>-2</sup> | 2.73 [0.89 – 8.61]  |
| GFR < 60 ml/min/1.73 m <sup>2</sup>                | 2.38%(1)   | 2.38%(1)   | 8.6.10 <sup>-1</sup> |                     |
| 60 ≤ GFR < 90 ml/min/1.73 m <sup>2</sup>           | 11.90%(5)  | 23.81%(10) | 5.6.10 <sup>-1</sup> |                     |
| 90 ≤ GFR ≤ 140 ml/min/1.73 m <sup>2</sup>          | 40.48%(17) | 52.38%(22) |                      |                     |
| UACR ≥ 30 mg/g                                     | 47.73%(21) | 8.89%(4)   |                      |                     |
| UACR < 30 mg/g                                     | 52.27%(23) | 91.11%(41) | < 10 <sup>-3</sup>   | 9.36 [2.64 – 41.02] |
| UPCR > 200 mg/g                                    | 37.21%(16) | 2.22%(1)   |                      |                     |
| UPCR ≤ 200 mg/g                                    | 62.79%(27) | 97.78%(44) | <10 <sup>-3</sup>    | 26.07 [3.5 -1117.4] |
| UPCR > 200 mg/g with $\frac{UACR}{UPCR} \geq 59\%$ | 0          | 0          |                      |                     |
| UPCR ≤ 200 mg/g with $\frac{UPCR}{UPCR} \geq 59\%$ | 2          | 0          | NA                   | NA                  |
| UPCR > 200 mg/g with $\frac{UACR}{UPCR} < 59\%$    | 39.02%(16) | 2.22%(1)   |                      |                     |
| UPCR ≤ 200 mg/g with $\frac{UACR}{UPCR} < 59\%$    | 60.98%(25) | 97.78%(44) | < 10 <sup>-3</sup>   | 28.2 [3.8-1206.7]   |
| UGCR ≥ 20 mg/g                                     | 25%(11)    | 6.67%(3)   |                      |                     |
| UGCR < 20 mg/g                                     | 75%(33)    | 93.33%(42) | 1.8.10 <sup>-2</sup> | 4.67 [1.09-27.69]   |

UACR, mg/g (x 0.113 mg/mmol). UPCR, mg/g (x 0.113 mg/mmol). UGCR, mg/g (x 0.625 μmol/mmol).

SS: sickle cell anemia patients free from diabetes. AA non-DT: controls free from sickle cell anemia and diabetes. n: effectif. USG: urine specific gravity. GFR: glomerular filtration rate was determined using Schwartz formula in children and adolescents and CKD-EPI formula in adults. UPCR: urinary protein /creatinine ratio. UACR: urinary albumin/creatinine ratio. RACU/RPCU: urinary albumine/total protein ratio. UGCR: urinary glucose/creatinine ratio. NA: not applicable.

123

124

125

## 126 **Discussion**

127 To our knowledge, this is the first study to investigate renal abnormalities in a group of patients  
128 living with SCA from Senegal, which revealed a relatively high proportion of patients with such  
129 a broad spectrum of abnormal biological indices of renal disorders. This was to some extent  
130 unexpected as most patients have the relatively favorable Senegal haplotype. This research will  
131 contribute to fill the gap of investigation of renal insult in African cohort and emphasize the  
132 need to improve prevention and care for all SCD patients in Africa irrespective of their genetic  
133 and regional background.

134 This study confirms that loss of the ability to concentrate urine appears to be the most common  
135 renal functional impairment in SCA, in line with a comparable prevalence of 94.8% that was  
136 reported among Americans living with SCD [16]. Hyposthenuria was defined, in our study, as  
137 an  $USG \leq 1.010$  which is equivalent to 400 milliosmoles according to the equation  
138  $mOsm/kgH_2O = (USG - 1,000) \times 40,000$  where  $mOsm/kgH_2O$  represents the urine osmolality  
139 and  $USG$  the urine specific gravity [17]. Hence, 400 milliosmoles would precisely represent the  
140 maximum concentration ability of the cortical nephrons and the minimum concentration ability  
141 of the juxta-glomerular nephrons associated with vasa recta [18]. Concentrating the urine  
142 beyond 400 milliosmoles would therefore require the intervention of the juxta-glomerular  
143 nephrons which, in association with the vasa recta, ensure the mechanism of the counter-current  
144 multiplication which concentrates the urine beyond 400 milliosmoles. In patients with SCA,  
145 the hypoxic, hyperosmolar and acidic medullary environment promotes sickling of the red  
146 blood cells [18]. Recurrent cycles of ischemia-reperfusion eventually destroy the vasa recta and  
147 the juxta-glomerular nephrons then lose their ability to concentrate urine, which becomes  
148 hyposthenuric [18]. This could explain why 35.3% of SCA patients had hyposthenuria  
149 compared with only 5.2% of controls with a significant difference ( $p < 10^{-3}$ ) and an OR = 9.95  
150 (95% CI: 4.43-25.12) “Table 4”.

151 GFR is the best renal biomarker that provides an overall assessment of kidney function. There  
152 is no consensus yet on the formula to be used to determine GFR in SCA patients. Similar to  
153 other authors, we used the Schwartz's formula in children and the CKD-EPI in adults to  
154 determine the GFR, and found a median value of 136.96 ml/min/1.73m<sup>2</sup>, that was comparable  
155 to those described among youngest Senegalese patients with SCD (130 ml/min/1.73m<sup>2</sup>),  
156 Cameroonian SCD patients (135.1 ml/min/1.73m<sup>2</sup>), Ghanaian SCD patients (136.09  
157 ml/min/1.73m<sup>2</sup>) and Jamaican SCD patients (137 ml/min /1.73m<sup>2</sup>) “Table 2” [12, 14, 19, 20,  
158 21]. In the absence of a consensual threshold, glomerular hyperfiltration (GHF) was defined, in  
159 our study, by a GFR > 140 ml/min/1.73m<sup>2</sup> without distinction of age or sex, like some authors  
160 [20, 22, 23]. The prevalence of GHF in SCA patients was 47.29% comparable to that found  
161 among American with SCD in Tennessee (47%) and among Cameroonian living with SCD  
162 (49.5%) “Table 5” [14, 24].

163 A theory to explain the occurrence of GHF in SCA has already been formulated [8, 25].  
164 Nevertheless, we have tried to propose a new one as both hyposthenuria and GHF would be  
165 statistically attributable to SCA. In healthy subjects, a decrease in GFR following a drop in  
166 blood pressure (BP) leads to a reduction in tubular osmolality [26]. In response to the hypo-  
167 osmolality detected by its osmoreceptors, the macula densa triggers tubulo-glomerular feedback  
168 mechanism and initiates hormonal regulation to increase GFR [26]. In SCA patients, the macula  
169 densa triggers these mechanisms to increase GFR assumed to be decreased. This results in GHF  
170 since the hypo-osmolality in SCA is not from a decrease in GFR but a loss of the concentration  
171 ability of the juxta-glomerular nephrons.

172 Over time, GHF could lead to glomerulosclerosis and possibly to kidney failure [27]. The  
173 prevalence of chronic renal failure found in this study (5.43%) was comparable to what  
174 previously reported among Americans with SCD (4%), similarly in SCD patients living in  
175 Brazil (5.1%) and India (5.68) “Table 5” [20, 24, 28, 29].



176 With SCA, the kidney undergoes structural lesions that may manifest as proteinuria,  
177 albuminuria and eventually microglucosuria. The 95<sup>th</sup> percentile of UACR in controls (32.43  
178 mg/g [3.66 mg/mmol]) is close to the conventional lower limit that defines microalbuminuria  
179 (30 mg/g [3.39 mg/mmol]) “Table 1”. Considering the conventional value, the prevalence of  
180 microalbuminuria was 42.38% among SCA patients in this study and was comparable to those  
181 found by a multicenter study in an African pediatric patients with SCA (36%) and with a  
182 multicenter study in two adult American cohorts (43.5%, 42%) and among a Nigerian group of  
183 patients with SCA (42.7%) “Table 4” [11, 27, 30, 31]. Macroalbuminuria was observed in our  
184 series only in a 10-year-old girl. While macroalbuminuria always indicates glomerulopathy, the  
185 clinical significance, specifically the glomerular and/or tubular origin of microalbuminuria, is  
186 not yet clearly established in patients with SCA [23, 27].

187 In healthy subjects, proteinuria can reach 180 mg/g (20.34 mg/mmol) [32]. In our study, the  
188 95<sup>th</sup> percentile of the UPCR in controls (181.48 mg/g [20.51 mg/mmol]) is close to the upper  
189 limit of normal proteinuria “Table 1” [32]. The prevalence of proteinuria (UPCR > 200 mg/g  
190 [22.6 mg/mmol]) found among Senegalese SCA patients (39.33%) was comparable to data from  
191 Ghana (40.8%), Saudi Arabia (41%) and the USA (41%) “Table 4” [19, 33, 34, 35].

192 The urinary albumin / total protein ratio (UACR/UPCR) was used to investigate whether the  
193 proteinuria could be of glomerular or tubular origin. Pathological proteinuria (UPCR > 200  
194 mg/g [22.6 mg/mmol]) of glomerular origin would consist of more than 59% albumin  
195 (UACR/UPCR  $\geq$  59%) otherwise it would be of tubular origin [33, 36]. Proteinuria was, as  
196 expected, physiological (UPCR  $\leq$  200 mg/g [22.6 mg/mmol]) and of tubular origin  
197 (UACR/UPCR < 59%) in 95.27% of controls “Table 4”. No pathological proteinuria (UPCR >  
198 200 mg/g [22.6 mg/mmol]) was of glomerular origin (UACR/UPCR  $\geq$  59%) in either SCA  
199 patients or controls “Table 4”. In contrast, pathological proteinuria (UPCR > 200 mg/g [22.6  
200 mg/mmol]) of tubular origin (UACR/UPCR < 59%) or tubular proteinuria was recorded in

201 40.97% of SCA patients and in 4.73% of controls with a significant difference ( $p < 10^{-3}$ ) and  
202 an  $OR = 13.97$  (95%CI: 6.22-35.15) “Table 4”. This would mean that proteinuria in SCA  
203 patients results more from tubular lesions than from glomerular damage. If this hypothesis was  
204 true, the tubular reabsorption of filtered glucose could be impaired and microglucosuria could  
205 be found in SCA patients “Table 4”. Thus, the prevalence of microglucosuria 22.5% found in  
206 this study provide evidence that proteinuria or even microalbuminuria could be caused by a  
207 decrease in tubular reabsorption of filtered proteins due to competition between hemoglobin  
208 and filtered proteins on the receptors of the proximal tubule or due to heme-induced proximal  
209 tubule lesions [37, 38]. Proximal tubule cells damaged in this way may no longer participate in  
210 the reabsorption of filtered proteins, albumin in particular and glucose, promoting the  
211 occurrence of tubular proteinuria, microalbuminuria and microglucosuria.

212 However, our study presented some limitations. First, it was impossible for us to assess  
213 whether the biomarkers were transiently or permanently disturbed since this was a case-control  
214 study. Second, odds ratios, which were very high in some cases, would reflect the presence of  
215 confounding factors that only a multivariate analysis could remove. Third, the serologic assays  
216 of *hepatitis B virus*, *Streptococcus pneumoniae* or *Schistosoma haematobium* had not been  
217 carried out though these pathogens may cause the kidney disorders in some controls or patients  
218 with SCA

219 In conclusion, this study showed a relatively high proportion of SCA nephropathies among  
220 patients living with SCA in Senegal. The study emphasizes that hyposthenuria, glomerular  
221 hyperfiltration, microalbuminuria, tubular proteinuria and microglucosuria could be relevant  
222 biomarkers of sickle cell nephropathy. Our study revealed a new biomarker, microglucosuria,  
223 which could be used as well as the urinary albumin/total protein ratio in association with  
224 proteinuria to diagnose renal tubular lesions in sickle cell anemia patients. The study to identify  
225 anthropometric, clinico-biological, genetic and even environmental risk factors that predispose

226 these biomarkers to disturbances will be necessary to be able to identify at-risk patients and  
227 allow early detection and therapeutic management of sickle cell nephropathy.

## 228 **Materials and Methods**

229 The study protocol complied with the ethical guidelines of the Helsinki Declaration and was  
230 approved by the Research Ethics Committee from the Cheikh Anta Diop University of Dakar  
231 (0312/2018/CER/UCAD) and by the Faculty of Health Sciences Human Research Ethics  
232 Committee from the University of Cape Town (HREC RE: 661/2015). Participation was  
233 subject to the free and informed consent of subjects who were at least 18 years old and parents  
234 or guardians of those under 18 years.

235 This was a case-control study that included SCA patients free from diabetes (SS) and controls  
236 with no detectable SCA and diabetes (AA non-DT).

237 Patients with SCA were recruited in Dakar (Senegal) at the National Blood Transfusion Center  
238 «Centre National de Transfusion Sanguine (CNTS)», the reference care center for adults with  
239 SCA; and the Ambulatory Care Unit for Children and Adolescents with Sickle Cell Disease  
240 «Unité de Soins Ambulatoires des enfants et adolescents atteints de Drépanocytose (USAD)»  
241 located at the Albert Royer National University Children's Hospital «Centre Hospitalier  
242 National d'Enfants Albert Royer (CHEAR) », the largest care unit for children and adolescents  
243 with SCA in Senegal. The control participants were recruited during two campaigns of free  
244 medical consultations organized in two suburbs of Dakar. Patients with SCA were included in  
245 the study if they were already enrolled in the sickle cell adult or infant cohort, at least 4 years  
246 of age, at a routine fasting visit, and in steady state health. The exclusion criteria included those  
247 in a pain crisis and/or with diabetes. Samples from the control participants were collected when  
248 they were apparently healthy and at least 4 years old. Control participants were excluded from

249 the study when their hemoglobin solubility test was positive and their *HBB* genotype was  $\beta^S/\beta^A$   
250 and/or their fasting blood sugar  $\geq 1.26$  g/l.

251 The assessment of biological indices was conducted at the Clinical Chemistry Laboratory of  
252 Albert Royer National University Children's Hospital of Dakar (CHEAR). The quantitative  
253 determination of hemoglobin with sodium lauryl sulfate, a cyanide-free reagent, was performed  
254 using the Sysmex XT-4000i (Sysmex Corporation, Kobe, Japan). Using a Mindray-BS-380  
255 clinical biochemistry analyzer (Mindray, Créteil, France) and Biosystems reagents (Biosystems  
256 reagents & instruments, Barcelone, Espagne), the following parameters were quantitatively  
257 determined by spectrophotometry: glycemia and glucosuria using glucose oxidase / peroxidase  
258 system, blood urea nitrogen (BUN) using urease / Berthelot reagent system, creatininemia and  
259 creatininuria using creatininase / creatinase / sarcosine oxidase / peroxidase enzymatic system  
260 with standardization to isotope dilution mass spectrometry, proteinuria using pyrogallol red,  
261 albuminuria using specific anti-human albumin antibodies by immunoturbidimetry. Glucose  
262 was also tested in urine using glucose oxidase / peroxidase activity of the urine test strips (nal  
263 von minden GmbH, Regensburg, Allemagne). Urine specific gravity was measured using an  
264 Atago-SPR-T2 refractometer (Atago, Saitama, Japon). GFR was computed using Schwartz's  
265 formula in children and adolescents, and Chronic Kidney Disease - EPIdemiology (CKD-EPI)  
266 equation in adults [39, 40].

267 Proteinuria and albuminuria were normalized with creatininuria and expressed as a ratio. Thus,  
268 proteinuria was expressed as a urinary protein to creatinine ratio (UPCR) and albuminuria as a  
269 urinary albumin to creatinine ratio (UACR). All two ratios were expressed as mg of protein or  
270 albumin per g of urine creatinine (mg/g). UPCR was defined as pathological proteinuria (UPCR  
271  $> 200$  mg/g [22.6 mg/mmol]) or physiological proteinuria (UPCR  $\leq 200$  mg/g [22.6 mg/mmol]).  
272 The urinary albumin / total protein ratio (UACR/UPCR) indicated the origin of proteinuria  
273 which was qualified as glomerular (UACR/UPCR  $\geq 59\%$ ) or tubular (UACR/UPCR  $< 59\%$ ).

274 Thus, for example, normal glomerular proteinuria was defined as  $UPCR \leq 200$  mg/g (22.6  
275 mg/mmol) with  $UACR / UPCR \geq 59\%$  while tubular pathologic proteinuria was defined as  
276  $UPCR > 200$  mg/g (22,6 mg/mmol) with  $UACR/UPCR < 59\%$ . UACR was defined as  
277 normoalbuminuria ( $UACR < 30$  mg/g [3.39 mg/mmol]), microalbuminuria (30 mg/g [3.39  
278 mg/mmol]  $\leq UACR < 300$  mg/g [33.9 mg/mmol]) or macroalbuminuria ( $UACR \geq 300$  mg/g  
279 [33.9 mg/mmol]). Microglucosuria was defined as glucosuria which is not the consequence of  
280 hyperglycemia and which might not be detectable by urine test strips that generally do not detect  
281 glucosuria below 50 mg/dl (2.775 mmol/l) but which is quantifiable by the glucose oxidase  
282 peroxidase method which can determine glucosuria 200 times lower (0.23 mg/dl [0.013  
283 mmol/l]) according to the manufacturers of the reagents used in our study. Glucosuria was  
284 normalized by determining the ratio of glucosuria (mg/dl) to creatininuria (g/dl), abbreviated  
285 UGCR, expressed in mg/g ( $\times 0.625$   $\mu\text{mol}/\text{mmol}$ ). Glucosuria greater than or equal to the 95<sup>th</sup>  
286 percentile of the UGCR in the control group was considered to be microglucosuria “Table 1”.  
287 Hyposthenuria qualified an USG  $\leq 5^{\text{th}}$  percentile of the USG observed in the control group.  
288 Glomerular hyperfiltration (GHF) was defined by  $GFR > 140$  ml/min/1.73m<sup>2</sup> and chronic renal  
289 failure by  $GFR < 60$  ml/min/1.73m<sup>2</sup>.

290 DNA was extracted from peripheral blood at the Clinical Chemistry Laboratory of Albert  
291 Royer National University Children's Hospital of Dakar (CHEAR) using Puregene Blood Kit  
292 (Qiagen, Hilden, Germany). Molecular confirmation of SCA was performed at the Division of  
293 Human Genetics, Faculty for Health Sciences, University of Cape Town using restriction  
294 fragment length polymorphism (RFLP) with the same materials and protocols previously  
295 described [14]. Molecular analysis to determine the presence of the sickle mutation was carried  
296 out by polymerase chain reaction (PCR) to amplify a 770 bp segment of *HBB*, followed by DdeI  
297 restriction analysis of the PCR product [14]. Genotyping for the *XmnI*-rs7482144 was

298 performed using the iPLEX Gold Sequenom Mass Genotyping Array (Inqaba Biotec, Pretoria,  
299 South Africa).

300 Descriptive statistics was used for anthropometric and biological variables (median,  
301 minimum, maximum, 5<sup>th</sup> and 95<sup>th</sup> percentiles), for both cases and controls. In addition, the  
302 Wilcoxon-Mann-Whitney test was used to compare the means, for quantitative variables,  
303 between cases and unmatched controls, and between cases and controls matched on age and  
304 sex. Relevant quantitative parameters of nephropathy were transformed into categorical  
305 variables. The comparison of the prevalence of biomarker disturbances was carried out using  
306 the  $\chi^2$  test between unmatched cases and controls and then between cases and controls matched  
307 on age and sex. When an association was statistically established, the odds ratio (OR) was then  
308 calculated. The significance level for the tests was set at  $p < 0.05$ . Statistical analysis was carried  
309 out using STATA version 14.0.370 for Windows TM (Stata Corp Inc., College Station, Texas,  
310 USA).

## References

1. Sundd P, Gladwin MT, Novelli EM. Pathophysiology of Sickle Cell Disease. *Annu Rev Pathol* 2019;14:263-92.
2. National Center of Biotechnology Information. NCBI ClinVar  
[www.ncbi.nlm.nih.gov/clinvar/variation/15333/](http://www.ncbi.nlm.nih.gov/clinvar/variation/15333/) (Accessed March 2021)  
[www.ncbi.nlm.nih.gov/clinvar/variation/14984/](http://www.ncbi.nlm.nih.gov/clinvar/variation/14984/) (Accessed March 2021)
3. Gueye Tall F, Martin C, Ndour EHM, Ly ID, Renoux C, Chillotti L, et al. Genetic Background of the Sickle Cell Disease Pediatric Population of Dakar, Senegal, and Characterization of a Novel Frameshift  $\beta$ -Thalassemia Mutation [HBB: c.265\_266del; p.Leu89Glufs\*2]. *Hemoglobin* 2017;41:89-95.

4. Piel FB, Patil AP, Howes RE, Nyangiri OA, Gething PW, Dewi M, et al. Global epidemiology of sickle haemoglobin in neonates: a contemporary geostatistical model-based map and population estimates. *Lancet* 2013;381:142–51.
5. Agence Nationale de la Statistique et de la Démographie (ANSD) de la République du Sénégal: La population du Sénégal en 2019, 2020.
6. World Health Organisation (WHO), Regional Committee for Africa Sixtieth Session Malabo, Equatorial Guinea: Sickle-Cell Disease: a strategy for the WHO African Region, 2011.
7. Banque Mondiale, Agence Nationale de la Statistique et de la Démographie (ANSD) de la République du Sénégal: Sénégal : cartes de pauvreté, édition 2011, 2016.
8. Nath KA, Heibel R P. Sickle cell disease: renal manifestations and mechanisms. *Nat Rev Nephrol* 2015;11:161–71.
9. Powars DR, Elliott-Mills DD, Chan L, Niland J, Hiti AL, Opas LM, Johnson C. Chronic renal failure in sickle cell disease: risk factors, clinical course, and mortality. *Ann Intern Med* 1991;115:614–620.
10. Powars DR, Chan LS, Hiti A, Ramicone E, Johnson C. Outcome of sickle cell anemia: a 4-decade observational study of 1056 patients. *Med Baltim* 2005;84:363–376.
11. Ranque B, Thiam MM, Diallo DA, Diop S, Diagne I, Sanogo I, et al. Sickle cell disease glomerulopathy in five subsaharian african countries: results of the Cadre Study. *Blood* 2013;122: 779.
12. Ranque B, Menet A, Diop IB, Thiam MM, Diallo D, Diop S, et al. Early renal damage in patients with sickle cell disease in sub-Saharan Africa: a multinational, prospective, cross-sectional study. *Lancet Haematol* 2014;1:e64–73.

13. Kaze FF, Kengne AP, Atanga LC, Monny Lobe M, Menanga AP, Halle MP, et al. Kidney function, urinalysis abnormalities and correlates in equatorial Africans with sickle cell disease. *Clin Kidney J* 2013;6:15-20.
14. Geard A, Pule GD, Chemegni BC, Bitoungui VJN, Kengne AP, Chimusa ER, Wonkam A. Clinical and genetic predictors of renal dysfunctions in sickle cell anaemia in Cameroon. *Br J Haematol* 2017;178:629-39.
15. Ozarda Y, Higgins V, Adeli K. Verification of reference intervals in routine clinical laboratories: practical challenges and recommendations. *Clin Chem Lab Med* 2019;57:30–37.
16. Sundaram N, Bennett M, Wilhelm J, Kim MO, Atweh G, Devarajan P, Malik P. Biomarkers for early detection of sickle nephropathy. *Am J Hematol* 2011;86:559-66.
17. Chadha V, Garg U, Alon U S. Measurement of urinary concentration: a critical appraisal of methodologies. *Pediatr Nephrol* 2001;16:374-82.
18. Stadius van Eps LW, Pinedo-Veels C, de Vries GH, de Koning J. Nature of concentrating defect in sickle-cell nephropathy. Microradioangiographic studies. *Lancet* 1970;1:450-2.
19. Ephraim RK, Osakunor DN, Cudjoe O, Oduro EA, Asante-Asamani L, Mitchell J, et al. Chronic kidney disease is common in sickle cell disease: a cross-sectional study in the Tema Metropolis, Ghana. *BMC Nephrol* 2015;16:75.
20. Lakkakula BVKS, Verma HK, Choubey M, Patra S, Khodiar PK, Patra PK. Assessment of renal function in Indian patients with sickle cell disease. *Saudi J Kidney Dis Transpl* 2017;28:524-31.



21. Thompson J, Reid M, Hambleton I, Serjant GR. Albuminuria and renal function in homozygous sickle cell disease: Observations from a cohort study. *Arch Intern Med* 2007;167:701–8.
22. Aloni MN, Ngiyulu RM, Ekulu PM, Mbutiwi FI, Makulo JR, Gini-Ehungu JL, et al. Glomerular hyperfiltration is strongly correlated with age in Congolese children with sickle cell anaemia. *Acta Paediatr* 2017;106:819-24.
23. Zahr RS, Yee ME, Weaver J, Twombly K, Matar RB, Aviles D, et al. Kidney biopsy findings in children with sickle cell disease: a Midwest Pediatric Nephrology Consortium study. *Pediatr Nephrol* 2019;34:1435-45.
24. Gosmanova EO, Zaidi S, Wan JY, Adams-Graves PE. Prevalence and progression of chronic kidney disease in adult patients with sickle cell disease. *J Investig Med* 2014;62:804–7.
25. De Jong PE, Stuijck Van Eps LW. Sickle cell nephropathy: new insights into its pathophysiology. *Kidney Int* 1985:711–17.
26. Blantz RC, Deng A, Miracle CM, Thomson SC. Regulation of kidney function and metabolism: a question of supply and demand. *Trans Am Clin Climatol Assoc* 2007;118:23-43.
27. Guasch A, Navarrete J, Nass K, Zayas CF. Glomerular involvement in adults with sickle cell hemoglobinopathies: prevalence and clinical correlates of progressive renal failure. *J Am Soc Nephrol* 2006;17:2228–35.
28. Kabir OO, Allegretti AS, Zhao SH, Achebe MM, Eneanya ND, Thadhani RI, et al. Kidney function decline among black patients with sickle cell trait and sickle cell disease: an observational cohort study. *J Am Soc Nephrol* 2020;3:393-404.

29. Silva GBJ, Libório AB, Vieira AP, Bem AX, Lopes ASF, Figueiredo ACF, et al. Evaluation of renal function in sickle cell disease patients in Brazil. *Braz J Med Biol Res* 2012;45:652-5.
30. Drawz P, Ayyappan S, Nourai M, Saraf S, Gordeuk V, Hostetter T, et al. Kidney disease among patients with sickle cell disease, hemoglobin SS and SC. *Clin J Am Soc Nephrol* 2016;11:207–15.
31. Solarin AU, Njokanma FO, Kehinde O. Prevalence and clinical correlates of microalbuminuria among children with sickle cell anaemia attending Lagos State University Teaching Hospital, Ikeja. *Afr J Paediatr Nephrol* 2014;1:37-45.
32. Bökenkamp A. Proteinuria—take a closer look! *Pediatr Nephrol* 2020;35:533–41.
33. Viteri B, Reid-Adam J. Hematuria and proteinuria in children. *Pediatr Rev* 2018;39:573–87.
34. Aleem A. Renal abnormalities in patients with sickle cell disease: a single center report from Saudi Arabia. *Saudi J Kidney Dis Transpl* 2008;19:194–99.
35. Marsenic O, Couloures KG, Wiley JM. Proteinuria in children with sickle cell disease. *Nephrol Dial Transplant* 2008;23:715–20.
36. Ohisa N, Yoshida K, Matsuki R, Suzuki H, Miura H, Ohisa Y, et al. A comparison of urinary albumin-total protein ratio to phase-contrast microscopic examination of urine sediment for differentiating glomerular and nonglomerular bleeding. *Am J Kidney Dis* 2008;52:235–41.

37. Eshbach ML, Kaur A, Rbaibi Y, Tejero J, Weisz OA. Hemoglobin inhibits albumin uptake by proximal tubule cells: implications for sickle cell disease. *Am J Physiol Cell Physiol* 2017;312:C733–40.

38. Gonzalez-Michaca L, Farrugia G, Croatt AJ, Alam J, Nath KA. Heme: a determinant of life and death in renal tubular epithelial cells. *Am J Physiol Renal Physiol* 2004;286:F370 –F377.

311

39. Schwartz GJ, Munoz A, Scheider MF, Mak RH, Kaskel F, Warady BA, Furth SL. New Equations to Estimate GFR in Children with CKD. *J Am Soc Nephrol* 2009;20:629–37.

40. Levey AS, Stevens LA, Schmid CH, Zhang YL, Castro AF, Feldman HI, et al. A new equation to estimate glomerular filtration rate. *Ann Intern Med* 2009;150:604–12.

312

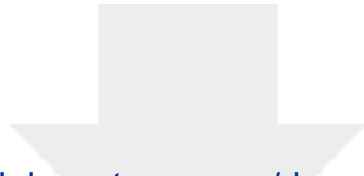

Click here to access/download  
**Supporting Information**  
renamed\_e56d3.pdf

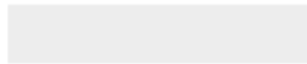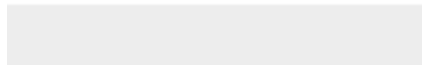

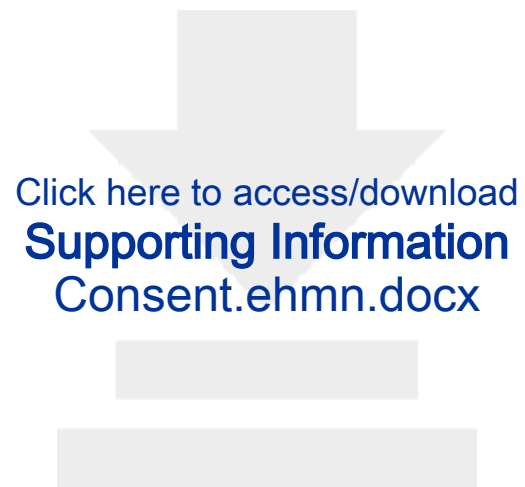

Click here to access/download  
**Supporting Information**  
Consent.ehmn.docx



Click here to access/download

**Supporting Information**

Formulaire de consentement.ehmn.docx

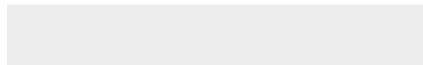



Click here to access/download  
**Supporting Information**  
Base AA non DT versus SS  
globale.01.02.2020.ehmn.ac.xlsx

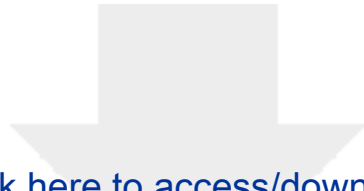

Click here to access/download  
**Supporting Information**  
Base AS.ehmn.plosone..xlsx

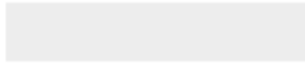

Supplement: pone.0273745.s006.pdf [file pone.0273745.s006.pdf]
