# Supplementary material for: Biomarkers of sickle cell nephropathy in Senegal
Source: PubMed Central journal article supplement (PMC9678278; doi:10.1371/journal.pone.0273745), 2022-11-21
Supplement: pone.0273745.s001.pdf [file pone.0273745.s001.pdf]

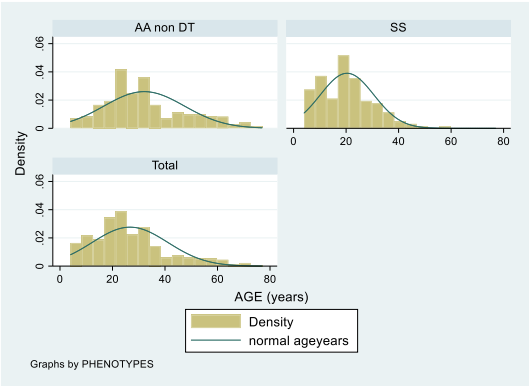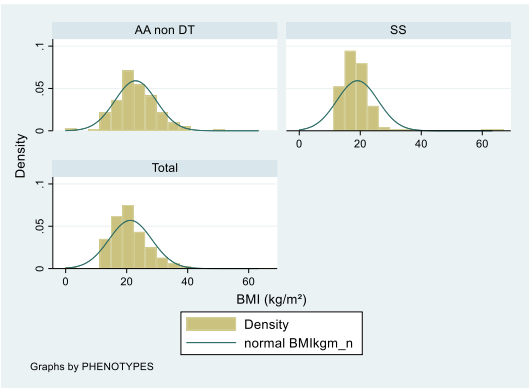

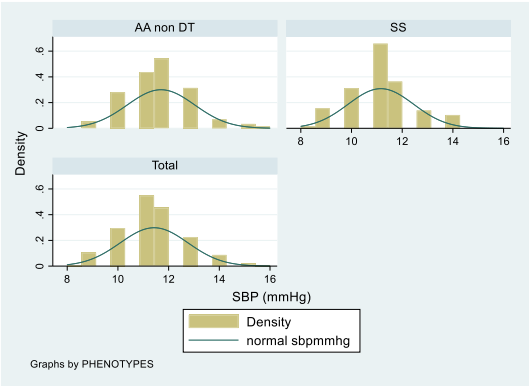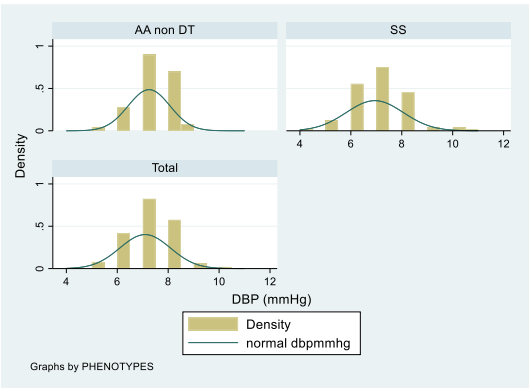

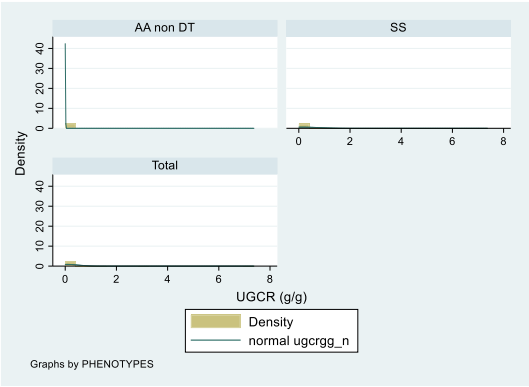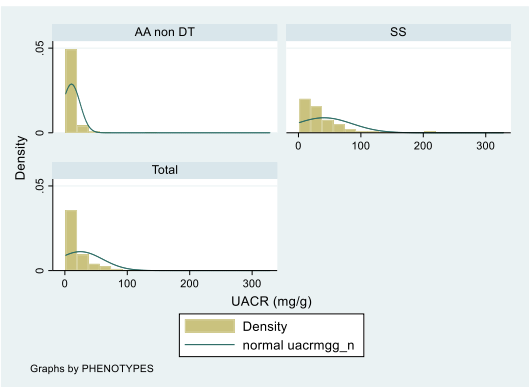

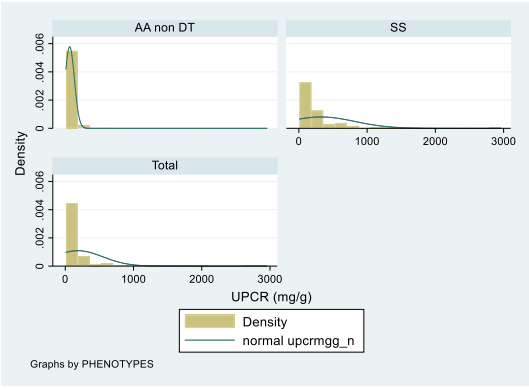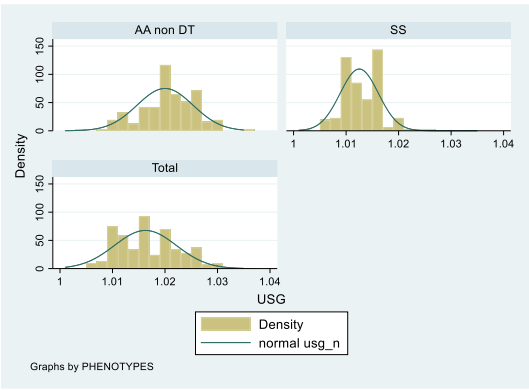

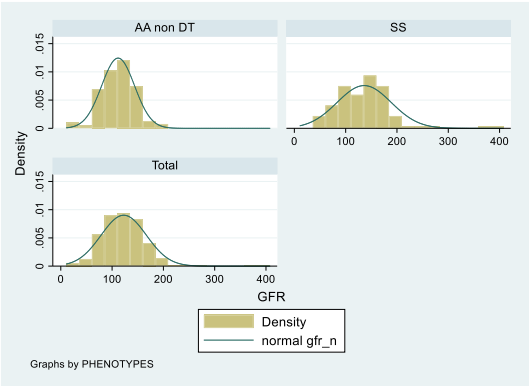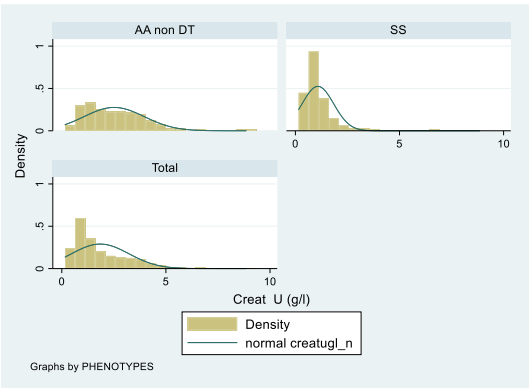

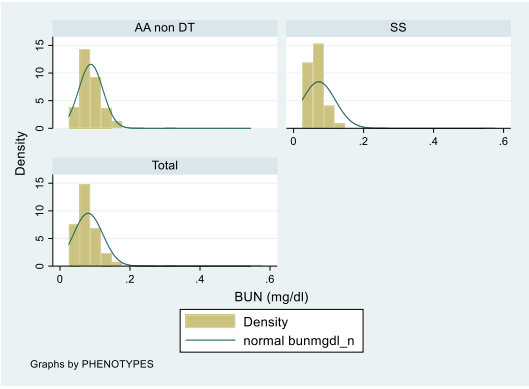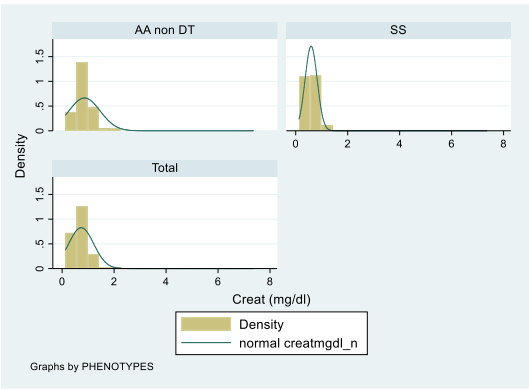

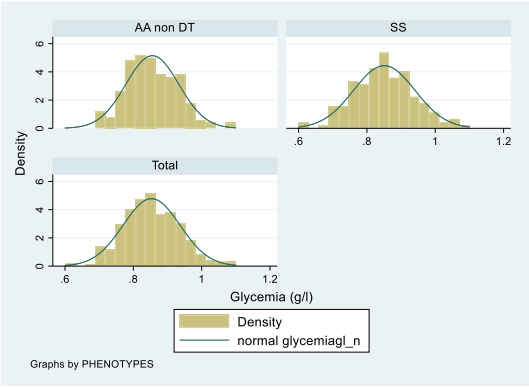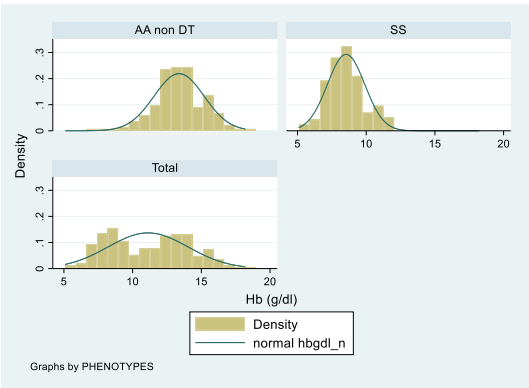

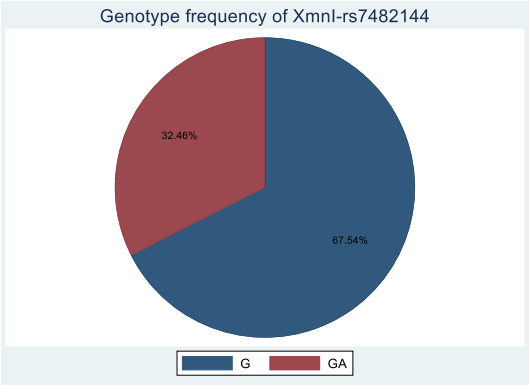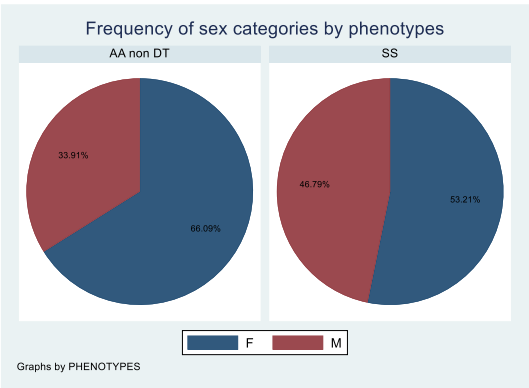



. summarize ageyears BMIkgm\_n sbpmmhg dbpmmhg ugcragg\_n uacrmgg\_n upcrmgg\_n usg\_> n gfr\_n creatugl\_n bunmgdl\_n creatmgdl\_n glycemiasi\_n hbgdl\_n, detail

AGE (years)

| Percentiles | Smallest  |          |             |          |
|-------------|-----------|----------|-------------|----------|
| 1%          | 5         | 4        |             |          |
| 5%          | 8         | 4        |             |          |
| 10%         | 10        | 4        | Obs         | 312      |
| 25%         | 17        | 5        | Sum of Wgt. | 312      |
| 50%         | 24        |          | Mean        | 26.68269 |
| Largest     | Std. Dev. | 14.44844 |             |          |
| 75%         | 32        | 69       |             |          |
| 90%         | 49        | 70       | Variance    | 208.7575 |
| 95%         | 58        | 71       | Skewness    | .9439906 |
| 99%         | 69        | 77       | Kurtosis    | 3.740819 |

BMI (kg/m<sup>2</sup>)

| Percentiles | Smallest  |          |             |          |
|-------------|-----------|----------|-------------|----------|
| 1%          | 10.56285  | 0        |             |          |
| 5%          | 13.20018  | 0        |             |          |
| 10%         | 14.1146   | 10.56285 | Obs         | 290      |
| 25%         | 16.89624  | 11.2367  | Sum of Wgt. | 290      |
| 50%         | 19.93319  |          | Mean        | 21.23138 |
| Largest     | Std. Dev. | 7.0038   |             |          |
| 75%         | 24.22145  | 39.54523 |             |          |
| 90%         | 28.89664  | 49.60938 | Variance    | 49.05322 |
| 95%         | 33.33333  | 61.22449 | Skewness    | 1.753236 |
| 99%         | 49.60938  | 63.26531 | Kurtosis    | 11.0602  |

SBP (mmHg)

| Percentiles |    | Smallest |             |          |
|-------------|----|----------|-------------|----------|
| 1%          | 9  | 8        |             |          |
| 5%          | 9  | 9        |             |          |
| 10%         | 10 | 9        | Obs         | 201      |
| 25%         | 11 | 9        | Sum of Wgt. | 201      |
| 50%         | 11 |          | Mean        | 11.42786 |
| Largest     |    |          | Std. Dev.   | 1.336421 |
| 75%         | 12 | 14       |             |          |
| 90%         | 13 | 15       | Variance    | 1.78602  |
| 95%         | 14 | 15       | Skewness    | .3186903 |
| 99%         | 15 | 16       | Kurtosis    | 3.250151 |

DBP (mmHg)

| Percentiles |    | Smallest |             |          |
|-------------|----|----------|-------------|----------|
| 1%          | 5  | 4        |             |          |
| 5%          | 6  | 5        |             |          |
| 10%         | 6  | 5        | Obs         | 201      |
| 25%         | 6  | 5        | Sum of Wgt. | 201      |
| 50%         | 7  |          | Mean        | 7.094527 |
| Largest     |    |          | Std. Dev.   | .9929853 |
| 75%         | 8  | 9        |             |          |
| 90%         | 8  | 10       | Variance    | .9860199 |
| 95%         | 8  | 10       | Skewness    | .1787037 |
| 99%         | 10 | 11       | Kurtosis    | 4.130733 |

UGCR (g/g)

| Percentiles | Smallest  |          |             |          |
|-------------|-----------|----------|-------------|----------|
| 1%          | 0         | 0        |             |          |
| 5%          | 0         | 0        |             |          |
| 10%         | 0         | 0        | Obs         | 327      |
| 25%         | 0         | 0        | Sum of Wgt. | 327      |
| 50%         | 0         |          | Mean        | .0530973 |
| Largest     | Std. Dev. | .4555013 |             |          |
| 75%         | .0111732  | .9345794 |             |          |
| 90%         | .0265306  | 1.315789 | Variance    | .2074814 |
| 95%         | .045977   | 3.184713 | Skewness    | 13.85904 |
| 99%         | .9345794  | 7.373272 | Kurtosis    | 212.3613 |

UACR (mg/g)

| Percentiles | Smallest  |          |             |          |
|-------------|-----------|----------|-------------|----------|
| 1%          | 2.264541  | 1.284553 |             |          |
| 5%          | 2.902857  | 2.212634 |             |          |
| 10%         | 3.74145   | 2.217795 | Obs         | 324      |
| 25%         | 5.977987  | 2.264541 | Sum of Wgt. | 324      |
| 50%         | 13.28253  |          | Mean        | 24.73155 |
| Largest     | Std. Dev. | 35.67064 |             |          |
| 75%         | 27.94813  | 208.2902 |             |          |
| 90%         | 56.64122  | 209.7872 | Variance    | 1272.394 |
| 95%         | 77.70492  | 233.7209 | Skewness    | 4.133535 |
| 99%         | 208.2902  | 328.6486 | Kurtosis    | 26.68751 |

UPCR (mg/g)

Percentiles Smallest

|         |           |          |             |          |
|---------|-----------|----------|-------------|----------|
| 1%      | 11.22941  | 9.212985 |             |          |
| 5%      | 17.01247  | 10.35513 |             |          |
| 10%     | 21.30393  | 10.88977 | Obs         | 323      |
| 25%     | 37.23641  | 11.22941 | Sum of Wgt. | 323      |
| 50%     | 69.10204  |          | Mean        | 184.96   |
| Largest | Std. Dev. | 365.3178 |             |          |
| 75%     | 167.3077  | 1920.784 |             |          |
| 90%     | 401.6279  | 2716.279 | Variance    | 133457.1 |
| 95%     | 656.5217  | 2804.145 | Skewness    | 4.856734 |
| 99%     | 1920.784  | 2957.838 | Kurtosis    | 30.84439 |

USG

|             |           |          |             |          |
|-------------|-----------|----------|-------------|----------|
| Percentiles | Smallest  |          |             |          |
| 1%          | 1.005     | 1.001    |             |          |
| 5%          | 1.008     | 1.004    |             |          |
| 10%         | 1.01      | 1.005    | Obs         | 307      |
| 25%         | 1.011     | 1.005    | Sum of Wgt. | 307      |
| 50%         | 1.015     |          | Mean        | 1.016274 |
| Largest     | Std. Dev. | .0059009 |             |          |
| 75%         | 1.02      | 1.03     |             |          |
| 90%         | 1.025     | 1.03     | Variance    | .0000348 |
| 95%         | 1.026     | 1.03     | Skewness    | .3383956 |
| 99%         | 1.03      | 1.035    | Kurtosis    | 2.559198 |

## GFR

Percentiles    Smallest

|     |          |          |             |     |
|-----|----------|----------|-------------|-----|
| 1%  | 31.65795 | 10.85409 |             |     |
| 5%  | 64.76591 | 20.45519 |             |     |
| 10% | 73.62174 | 31.65795 | Obs         | 286 |
| 25% | 94.91754 | 34.89279 | Sum of Wgt. | 286 |

|     |          |  |      |          |
|-----|----------|--|------|----------|
| 50% | 123.0369 |  | Mean | 122.7038 |
|-----|----------|--|------|----------|

|         |           |          |  |  |
|---------|-----------|----------|--|--|
| Largest | Std. Dev. | 44.23484 |  |  |
|---------|-----------|----------|--|--|

|     |          |          |          |          |
|-----|----------|----------|----------|----------|
| 75% | 146.0028 | 241.192  |          |          |
| 90% | 170.6647 | 265.972  | Variance | 1956.721 |
| 95% | 186.2326 | 358.9923 | Skewness | 1.505499 |
| 99% | 265.972  | 407.8375 | Kurtosis | 10.89663 |

## Creat U (g/l)

Percentiles    Smallest

|     |      |      |             |     |
|-----|------|------|-------------|-----|
| 1%  | .235 | .155 |             |     |
| 5%  | .49  | .185 |             |     |
| 10% | .58  | .221 | Obs         | 326 |
| 25% | .835 | .235 | Sum of Wgt. | 326 |

|     |       |  |      |         |
|-----|-------|--|------|---------|
| 50% | 1.359 |  | Mean | 1.84592 |
|-----|-------|--|------|---------|

|         |           |          |  |  |
|---------|-----------|----------|--|--|
| Largest | Std. Dev. | 1.376243 |  |  |
|---------|-----------|----------|--|--|

|     |        |        |          |          |
|-----|--------|--------|----------|----------|
| 75% | 2.585  | 6.4535 |          |          |
| 90% | 3.8505 | 6.785  | Variance | 1.894044 |
| 95% | 4.383  | 8.54   | Skewness | 1.61467  |
| 99% | 6.4535 | 8.86   | Kurtosis | 6.572314 |

BUN (mg/dl)

| Percentiles |      | Smallest |             |          |
|-------------|------|----------|-------------|----------|
| 1%          | .03  | .025     |             |          |
| 5%          | .04  | .025     |             |          |
| 10%         | .05  | .03      | Obs         | 305      |
| 25%         | .06  | .03      | Sum of Wgt. | 305      |
| 50%         | .075 |          | Mean        | .080541  |
| Largest     |      |          | Std. Dev.   | .0417399 |
| 75%         | .095 | .21      |             |          |
| 90%         | .12  | .25      | Variance    | .0017422 |
| 95%         | .135 | .315     | Skewness    | 5.559692 |
| 99%         | .21  | .545     | Kurtosis    | 55.60227 |

Creat (mg/dl)

| Percentiles |       | Smallest |             |          |
|-------------|-------|----------|-------------|----------|
| 1%          | .23   | .13      |             |          |
| 5%          | .31   | .16      |             |          |
| 10%         | .362  | .22      | Obs         | 317      |
| 25%         | .52   | .23      | Sum of Wgt. | 317      |
| 50%         | .67   |          | Mean        | .7333312 |
| Largest     |       |          | Std. Dev.   | .4822367 |
| 75%         | .86   | 1.945    |             |          |
| 90%         | 1.09  | 2.11     | Variance    | .2325522 |
| 95%         | 1.27  | 2.12     | Skewness    | 8.512614 |
| 99%         | 1.945 | 7.36     | Kurtosis    | 114.1765 |

### Glycemia (g/l)

Percentiles    Smallest

1%        .7        .6

5%        .72       .62

10%       .75       .66    Obs        322

25%       .8        .7    Sum of Wgt.    322

50%       .85                    Mean        .8533416

Largest    Std. Dev.   .0834919

75%       .91       1.06

90%       .96       1.08    Variance    .0069709

95%       .99       1.09    Skewness    .1530377

99%       1.06       1.1    Kurtosis    3.020297

### Hb (g/dl)

Percentiles    Smallest

1%        5.9       5.1

5%        7        5.5

10%       7.5       5.7    Obs        318

25%       8.5       5.9    Sum of Wgt.    318

50%       11.2                    Mean        11.12673

Largest    Std. Dev.   2.914731

75%       13.5       16.9

90%       15.2       17    Variance    8.495656

95%       15.8       17.9    Skewness    .1203603

99%       16.9       18.2    Kurtosis    1.913712

```
. by phenotypes, sort : summarize ageyears BMIkgm_n sbpmmhg dbpmmhg ugcragg_n ua
> crmagg_n upcrmagg_n usg_n gfr_n creatugl_n bunmgdl_n creatmgdl_n glyceciagl_n
> hbhdl_n, detail
```

-> phenotypes = AA non DT

AGE (years)

| Percentiles | Smallest  |          |                   |
|-------------|-----------|----------|-------------------|
| 1%          | 5         | 4        |                   |
| 5%          | 10        | 5        |                   |
| 10%         | 15        | 5        | Obs 168           |
| 25%         | 22        | 8        | Sum of Wgt. 168   |
| 50%         | 29        |          | Mean 32.08929     |
| Largest     | Std. Dev. | 15.34546 |                   |
| 75%         | 40        | 69       |                   |
| 90%         | 57        | 70       | Variance 235.483  |
| 95%         | 61        | 71       | Skewness .7224162 |
| 99%         | 71        | 77       | Kurtosis 3.001759 |

BMI (kg/m<sup>2</sup>)

| Percentiles | Smallest  |          |                   |
|-------------|-----------|----------|-------------------|
| 1%          | 0         | 0        |                   |
| 5%          | 13.51644  | 0        |                   |
| 10%         | 15.427    | 10.56285 | Obs 162           |
| 25%         | 18.87755  | 12.04411 | Sum of Wgt. 162   |
| 50%         | 22.3847   |          | Mean 22.92112     |
| Largest     | Std. Dev. | 6.754727 |                   |
| 75%         | 26.72993  | 37.87755 |                   |
| 90%         | 31.2213   | 38.30317 | Variance 45.62634 |



|     |          |          |          |          |
|-----|----------|----------|----------|----------|
| 95% | 34.02035 | 39.54523 | Skewness | .1915183 |
| 99% | 39.54523 | 49.60938 | Kurtosis | 4.875264 |

SBP (mmHg)

| Percentiles | Smallest  |         |             |          |
|-------------|-----------|---------|-------------|----------|
| 1%          | 9         | 9       |             |          |
| 5%          | 10        | 9       |             |          |
| 10%         | 10        | 9       | Obs         | 100      |
| 25%         | 11        | 10      | Sum of Wgt. | 100      |
| 50%         | 12        |         | Mean        | 11.7     |
| Largest     | Std. Dev. | 1.32954 |             |          |
| 75%         | 12.5      | 14      |             |          |
| 90%         | 13        | 15      | Variance    | 1.767677 |
| 95%         | 14        | 15      | Skewness    | .4069058 |
| 99%         | 15.5      | 16      | Kurtosis    | 3.401567 |

DBP (mmHg)

| Percentiles | Smallest  |          |             |           |
|-------------|-----------|----------|-------------|-----------|
| 1%          | 5         | 5        |             |           |
| 5%          | 6         | 5        |             |           |
| 10%         | 6         | 6        | Obs         | 100       |
| 25%         | 7         | 6        | Sum of Wgt. | 100       |
| 50%         | 7         |          | Mean        | 7.25      |
| Largest     | Std. Dev. | .8211227 |             |           |
| 75%         | 8         | 9        |             |           |
| 90%         | 8         | 9        | Variance    | .6742424  |
| 95%         | 8         | 9        | Skewness    | -.2681754 |
| 99%         | 9         | 9        | Kurtosis    | 3.012036  |

UGCR (g/g)

| Percentiles | Smallest  |          |             |          |
|-------------|-----------|----------|-------------|----------|
| 1%          | 0         | 0        |             |          |
| 5%          | 0         | 0        |             |          |
| 10%         | 0         | 0        | Obs         | 176      |
| 25%         | 0         | 0        | Sum of Wgt. | 176      |
| 50%         | 0         |          | Mean        | .0043793 |
| Largest     | Std. Dev. | .0081416 |             |          |
| 75%         | .0067975  | .0363636 |             |          |
| 90%         | .0128205  | .0365059 | Variance    | .0000663 |
| 95%         | .0200501  | .0442804 | Skewness    | 2.944001 |
| 99%         | .0442804  | .0519481 | Kurtosis    | 13.89307 |

UACR (mg/g)

| Percentiles | Smallest  |          |             |          |
|-------------|-----------|----------|-------------|----------|
| 1%          | 2.212634  | 1.284553 |             |          |
| 5%          | 2.619808  | 2.212634 |             |          |
| 10%         | 2.996755  | 2.217795 | Obs         | 173      |
| 25%         | 4.194122  | 2.264541 | Sum of Wgt. | 173      |
| 50%         | 6.521739  |          | Mean        | 10.58006 |
| Largest     | Std. Dev. | 13.87203 |             |          |
| 75%         | 12.16179  | 48.48485 |             |          |
| 90%         | 20.23468  | 48.67188 | Variance    | 192.4332 |
| 95%         | 32.42604  | 69.20924 | Skewness    | 5.578316 |
| 99%         | 69.20924  | 139.0698 | Kurtosis    | 46.22677 |

UPCR (mg/g)

Percentiles Smallest

|         |           |          |             |          |
|---------|-----------|----------|-------------|----------|
| 1%      | 10.35513  | 9.212985 |             |          |
| 5%      | 15.07112  | 10.35513 |             |          |
| 10%     | 17.44239  | 10.88977 | Obs         | 173      |
| 25%     | 25.54288  | 11.22941 | Sum of Wgt. | 173      |
| 50%     | 44.74194  |          | Mean        | 64.79121 |
| Largest | Std. Dev. | 68.94344 |             |          |
| 75%     | 73.72668  | 297.485  |             |          |
| 90%     | 126.7181  | 309.2105 | Variance    | 4753.198 |
| 95%     | 181.4847  | 401.6279 | Skewness    | 3.399907 |
| 99%     | 401.6279  | 530.2738 | Kurtosis    | 18.43167 |

USG

Percentiles Smallest

|         |           |          |             |           |
|---------|-----------|----------|-------------|-----------|
| 1%      | 1.007     | 1.004    |             |           |
| 5%      | 1.01      | 1.007    |             |           |
| 10%     | 1.012     | 1.009    | Obs         | 154       |
| 25%     | 1.017     | 1.009    | Sum of Wgt. | 154       |
| 50%     | 1.02      |          | Mean        | 1.020006  |
| Largest | Std. Dev. | .0053192 |             |           |
| 75%     | 1.024     | 1.03     |             |           |
| 90%     | 1.026     | 1.03     | Variance    | .0000283  |
| 95%     | 1.028     | 1.03     | Skewness    | -.2985073 |
| 99%     | 1.03      | 1.035    | Kurtosis    | 3.124557  |

## GFR

### Percentiles Smallest

|     |          |          |             |     |
|-----|----------|----------|-------------|-----|
| 1%  | 20.45519 | 10.85409 |             |     |
| 5%  | 68.27573 | 20.45519 |             |     |
| 10% | 73.94323 | 31.65795 | Obs         | 157 |
| 25% | 88.91493 | 34.89279 | Sum of Wgt. | 157 |

|     |          |  |      |          |
|-----|----------|--|------|----------|
| 50% | 114.4124 |  | Mean | 111.7363 |
|-----|----------|--|------|----------|

|         |           |          |  |  |
|---------|-----------|----------|--|--|
| Largest | Std. Dev. | 32.06331 |  |  |
|---------|-----------|----------|--|--|

|     |          |          |          |           |
|-----|----------|----------|----------|-----------|
| 75% | 134.0415 | 168.7913 |          |           |
| 90% | 149.0465 | 186.2326 | Variance | 1028.056  |
| 95% | 160.5992 | 198.4262 | Skewness | -.2215852 |
| 99% | 198.4262 | 200.3695 | Kurtosis | 3.578274  |

## Creat U (g/l)

### Percentiles Smallest

|     |        |      |             |     |
|-----|--------|------|-------------|-----|
| 1%  | .495   | .221 |             |     |
| 5%  | .76    | .495 |             |     |
| 10% | .895   | .526 | Obs         | 174 |
| 25% | 1.3795 | .535 | Sum of Wgt. | 174 |

|     |       |  |      |         |
|-----|-------|--|------|---------|
| 50% | 2.271 |  | Mean | 2.51379 |
|-----|-------|--|------|---------|

|         |           |          |  |  |
|---------|-----------|----------|--|--|
| Largest | Std. Dev. | 1.446276 |  |  |
|---------|-----------|----------|--|--|

|     |       |        |          |          |
|-----|-------|--------|----------|----------|
| 75% | 3.44  | 5.8885 |          |          |
| 90% | 4.33  | 6.4535 | Variance | 2.091714 |
| 95% | 4.856 | 8.54   | Skewness | 1.18674  |
| 99% | 8.54  | 8.86   | Kurtosis | 5.529523 |

BUN (mg/dl)

| Percentiles |           | Smallest |             |          |
|-------------|-----------|----------|-------------|----------|
| 1%          | .03       | .025     |             |          |
| 5%          | .05       | .03      |             |          |
| 10%         | .055      | .04      | Obs         | 162      |
| 25%         | .065      | .04      | Sum of Wgt. | 162      |
| 50%         | .08       |          | Mean        | .0880864 |
| Largest     | Std. Dev. | .0344574 |             |          |
| 75%         | .105      | .165     |             |          |
| 90%         | .125      | .17      | Variance    | .0011873 |
| 95%         | .14       | .21      | Skewness    | 2.24408  |
| 99%         | .21       | .315     | Kurtosis    | 13.98454 |

Creat (mg/dl)

| Percentiles |           | Smallest |             |          |
|-------------|-----------|----------|-------------|----------|
| 1%          | .24       | .23      |             |          |
| 5%          | .383      | .24      |             |          |
| 10%         | .497      | .247     | Obs         | 166      |
| 25%         | .62       | .25      | Sum of Wgt. | 166      |
| 50%         | .777      |          | Mean        | .8609157 |
| Largest     | Std. Dev. | .6013865 |             |          |
| 75%         | .98       | 1.945    |             |          |
| 90%         | 1.23      | 2.11     | Variance    | .3616657 |
| 95%         | 1.4       | 2.12     | Skewness    | 7.824569 |
| 99%         | 2.12      | 7.36     | Kurtosis    | 83.63363 |

### Glycemia (g/l)

Percentiles    Smallest

1%        .7        .7

5%        .73       .7

10%       .76       .7    Obs        170

25%       .8        .7    Sum of Wgt.    170

50%       .84                    Mean        .8556471

Largest    Std. Dev.    .0775352

75%       .91        1.02

90%       .95        1.02    Variance    .0060117

95%       .98        1.09    Skewness    .3215538

99%       1.09       1.1    Kurtosis    2.968592

### Hb (g/dl)

Percentiles    Smallest

1%        8        7.4

5%        10.2       8

10%       11.2       8.8    Obs        170

25%       12.4       9.1    Sum of Wgt.    170

50%       13.3                    Mean        13.38294

Largest    Std. Dev.    1.821763

75%       14.5        16.9

90%       15.8        17    Variance    3.31882

95%       16.2        17.9    Skewness    -.2397847

99%       17.9        18.2    Kurtosis    3.551123

-> phenotypes = SS

AGE (years)

| Percentiles | Smallest  |         |                   |
|-------------|-----------|---------|-------------------|
| 1%          | 4         | 4       |                   |
| 5%          | 6         | 4       |                   |
| 10%         | 8         | 5       | Obs 144           |
| 25%         | 12        | 6       | Sum of Wgt. 144   |
| 50%         | 20        |         | Mean 20.375       |
| Largest     | Std. Dev. | 10.2274 |                   |
| 75%         | 26        | 43      |                   |
| 90%         | 34        | 45      | Variance 104.5997 |
| 95%         | 38        | 49      | Skewness .683576  |
| 99%         | 49        | 57      | Kurtosis 3.408119 |

BMI (kg/m<sup>2</sup>)

| Percentiles | Smallest  |          |                   |
|-------------|-----------|----------|-------------------|
| 1%          | 11.96775  | 11.2367  |                   |
| 5%          | 13.15193  | 11.96775 |                   |
| 10%         | 13.55529  | 11.96775 | Obs 128           |
| 25%         | 15.74317  | 12.3452  | Sum of Wgt. 128   |
| 50%         | 18.00952  |          | Mean 19.09281     |
| Largest     | Std. Dev. | 6.747755 |                   |
| 75%         | 20.9527   | 33.33333 |                   |
| 90%         | 24.00549  | 33.71488 | Variance 45.53219 |
| 95%         | 26.03749  | 61.22449 | Skewness 4.235867 |
| 99%         | 61.22449  | 63.26531 | Kurtosis 27.16522 |

SBP (mmHg)

| Percentiles |    | Smallest |             |          |
|-------------|----|----------|-------------|----------|
| 1%          | 9  | 8        |             |          |
| 5%          | 9  | 9        |             |          |
| 10%         | 10 | 9        | Obs         | 101      |
| 25%         | 10 | 9        | Sum of Wgt. | 101      |
| 50%         | 11 |          | Mean        | 11.15842 |
| Largest     |    |          | Std. Dev.   | 1.294084 |
| 75%         | 12 | 14       |             |          |
| 90%         | 13 | 14       | Variance    | 1.674653 |
| 95%         | 14 | 14       | Skewness    | .2319202 |
| 99%         | 14 | 14       | Kurtosis    | 2.95686  |

DBP (mmHg)

| Percentiles |    | Smallest |             |          |
|-------------|----|----------|-------------|----------|
| 1%          | 5  | 4        |             |          |
| 5%          | 5  | 5        |             |          |
| 10%         | 6  | 5        | Obs         | 101      |
| 25%         | 6  | 5        | Sum of Wgt. | 101      |
| 50%         | 7  |          | Mean        | 6.940594 |
| Largest     |    |          | Std. Dev.   | 1.120908 |
| 75%         | 8  | 9        |             |          |
| 90%         | 8  | 10       | Variance    | 1.256436 |
| 95%         | 8  | 10       | Skewness    | .5452782 |
| 99%         | 10 | 11       | Kurtosis    | 4.436952 |



UGCR (g/g)

| Percentiles | Smallest  |          |                   |
|-------------|-----------|----------|-------------------|
| 1%          | 0         | 0        |                   |
| 5%          | 0         | 0        |                   |
| 10%         | 0         | 0        | Obs 151           |
| 25%         | 0         | 0        | Sum of Wgt. 151   |
| 50%         | .0051813  | Mean     | .1098812          |
| Largest     | Std. Dev. | .666947  |                   |
| 75%         | .017094   | .9345794 |                   |
| 90%         | .045977   | 1.315789 | Variance .4448183 |
| 95%         | .1935484  | 3.184713 | Skewness 9.356007 |
| 99%         | 3.184713  | 7.373272 | Kurtosis 97.53371 |

UACR (mg/g)

| Percentiles | Smallest  |          |                   |
|-------------|-----------|----------|-------------------|
| 1%          | 4.465733  | 2.635659 |                   |
| 5%          | 6.857143  | 4.465733 |                   |
| 10%         | 9.325018  | 4.697987 | Obs 151           |
| 25%         | 16.25468  | 4.958184 | Sum of Wgt. 151   |
| 50%         | 25.66845  | Mean     | 40.94486          |
| Largest     | Std. Dev. | 44.98485 |                   |
| 75%         | 48.57143  | 208.2902 |                   |
| 90%         | 77.70492  | 209.7872 | Variance 2023.637 |
| 95%         | 122.6316  | 233.7209 | Skewness 3.265169 |
| 99%         | 233.7209  | 328.6486 | Kurtosis 16.9563  |

UPCR (mg/g)

Percentiles Smallest

|     |          |          |             |     |
|-----|----------|----------|-------------|-----|
| 1%  | 19.72973 | 17.24138 |             |     |
| 5%  | 29.40767 | 19.72973 |             |     |
| 10% | 45.18859 | 20.42194 | Obs         | 150 |
| 25% | 70.74334 | 21.70213 | Sum of Wgt. | 150 |

|     |          |  |      |          |
|-----|----------|--|------|----------|
| 50% | 156.6704 |  | Mean | 323.5547 |
|-----|----------|--|------|----------|

|         |           |          |  |  |
|---------|-----------|----------|--|--|
| Largest | Std. Dev. | 496.8096 |  |  |
|---------|-----------|----------|--|--|

|     |          |          |          |          |
|-----|----------|----------|----------|----------|
| 75% | 303.5294 | 1920.784 |          |          |
| 90% | 707.2093 | 2716.279 | Variance | 246819.8 |
| 95% | 1388.767 | 2804.145 | Skewness | 3.341108 |
| 99% | 2804.145 | 2957.838 | Kurtosis | 15.3316  |

USG

Percentiles Smallest

|     |       |       |             |     |
|-----|-------|-------|-------------|-----|
| 1%  | 1.005 | 1.001 |             |     |
| 5%  | 1.007 | 1.005 |             |     |
| 10% | 1.009 | 1.005 | Obs         | 153 |
| 25% | 1.01  | 1.005 | Sum of Wgt. | 153 |

|     |       |  |      |          |
|-----|-------|--|------|----------|
| 50% | 1.012 |  | Mean | 1.012516 |
|-----|-------|--|------|----------|

|         |           |          |  |  |
|---------|-----------|----------|--|--|
| Largest | Std. Dev. | .0036457 |  |  |
|---------|-----------|----------|--|--|

|     |       |       |          |          |
|-----|-------|-------|----------|----------|
| 75% | 1.015 | 1.02  |          |          |
| 90% | 1.015 | 1.021 | Variance | .0000133 |
| 95% | 1.02  | 1.024 | Skewness | .3392769 |
| 99% | 1.024 | 1.025 | Kurtosis | 4.216059 |

GFR

| Percentiles | Smallest  |          |             |          |
|-------------|-----------|----------|-------------|----------|
| 1%          | 47.36239  | 38.30725 |             |          |
| 5%          | 58.50642  | 47.36239 |             |          |
| 10%         | 69.3      | 51.625   | Obs         | 129      |
| 25%         | 102.8286  | 55.70698 | Sum of Wgt. | 129      |
| 50%         | 136.9561  |          | Mean        | 136.0517 |
| Largest     | Std. Dev. | 52.69461 |             |          |
| 75%         | 163.924   | 241.192  |             |          |
| 90%         | 184.0071  | 265.972  | Variance    | 2776.722 |
| 95%         | 196.7909  | 358.9923 | Skewness    | 1.562687 |
| 99%         | 358.9923  | 407.8375 | Kurtosis    | 9.34806  |

Creat U (g/l)

| Percentiles | Smallest  |         |             |          |
|-------------|-----------|---------|-------------|----------|
| 1%          | .185      | .155    |             |          |
| 5%          | .37       | .185    |             |          |
| 10%         | .49       | .235    | Obs         | 152      |
| 25%         | .684      | .25     | Sum of Wgt. | 152      |
| 50%         | .875      |         | Mean        | 1.081385 |
| Largest     | Std. Dev. | .760092 |             |          |
| 75%         | 1.23225   | 3.26    |             |          |
| 90%         | 1.815     | 3.415   | Variance    | .5777399 |
| 95%         | 2.33      | 3.565   | Skewness    | 3.595538 |
| 99%         | 3.565     | 6.785   | Kurtosis    | 23.74932 |

BUN (mg/dl)

| Percentiles |           | Smallest |             |          |
|-------------|-----------|----------|-------------|----------|
| 1%          | .03       | .025     |             |          |
| 5%          | .04       | .03      |             |          |
| 10%         | .045      | .035     | Obs         | 143      |
| 25%         | .055      | .04      | Sum of Wgt. | 143      |
| 50%         | .065      |          | Mean        | .071993  |
| Largest     | Std. Dev. | .0473827 |             |          |
| 75%         | .08       | .135     |             |          |
| 90%         | .1        | .14      | Variance    | .0022451 |
| 95%         | .105      | .25      | Skewness    | 7.42966  |
| 99%         | .25       | .545     | Kurtosis    | 71.97552 |

Creat (mg/dl)

| Percentiles |           | Smallest |             |          |
|-------------|-----------|----------|-------------|----------|
| 1%          | .16       | .13      |             |          |
| 5%          | .269      | .16      |             |          |
| 10%         | .323      | .22      | Obs         | 151      |
| 25%         | .426      | .25      | Sum of Wgt. | 151      |
| 50%         | .57       |          | Mean        | .5930728 |
| Largest     | Std. Dev. | .232938  |             |          |
| 75%         | .73       | 1.14     |             |          |
| 90%         | .87       | 1.29     | Variance    | .0542601 |
| 95%         | .99       | 1.38     | Skewness    | 1.00046  |
| 99%         | 1.38      | 1.58     | Kurtosis    | 5.055942 |

### Glycemia (g/l)

| Percentiles |      | Smallest |             |          |
|-------------|------|----------|-------------|----------|
| 1%          | .62  | .6       |             |          |
| 5%          | .71  | .62      |             |          |
| 10%         | .73  | .66      | Obs         | 152      |
| 25%         | .79  | .7       | Sum of Wgt. | 152      |
| 50%         | .85  |          | Mean        | .8507632 |
| Largest     |      |          | Std. Dev.   | .0898773 |
| 75%         | .91  | 1.05     |             |          |
| 90%         | .97  | 1.05     | Variance    | .0080779 |
| 95%         | 1.01 | 1.06     | Skewness    | .0521707 |
| 99%         | 1.06 | 1.08     | Kurtosis    | 2.930605 |

### Hb (g/dl)

| Percentiles |      | Smallest |             |          |
|-------------|------|----------|-------------|----------|
| 1%          | 5.5  | 5.1      |             |          |
| 5%          | 6.6  | 5.5      |             |          |
| 10%         | 7    | 5.7      | Obs         | 148      |
| 25%         | 7.6  | 5.9      | Sum of Wgt. | 148      |
| 50%         | 8.4  |          | Mean        | 8.535135 |
| Largest     |      |          | Std. Dev.   | 1.362364 |
| 75%         | 9.3  | 11.6     |             |          |
| 90%         | 10.7 | 11.6     | Variance    | 1.856036 |
| 95%         | 11   | 11.6     | Skewness    | .3673008 |
| 99%         | 11.6 | 12       | Kurtosis    | 2.951026 |

```
. by phenotypes, sort : summarize ageyears BMIkgm_n sbpmmhg dbpmmhg creatugl_n
> bunmgdl_n creatmgdl_n glyceciagl_n hbgdl_n
```

---

```
-> phenotypes = AA non DT
```

| Variable     | Obs | Mean     | Std. Dev. | Min  | Max      |
|--------------|-----|----------|-----------|------|----------|
| ageyears     | 168 | 32.08929 | 15.34546  | 4    | 77       |
| BMIkgm_n     | 162 | 22.92112 | 6.754727  | 0    | 49.60938 |
| sbpmmhg      | 100 | 11.7     | 1.32954   | 9    | 16       |
| dbpmmhg      | 100 | 7.25     | .8211227  | 5    | 9        |
| creatugl_n   | 174 | 2.51379  | 1.446276  | .221 | 8.86     |
| bunmgdl_n    | 162 | .0880864 | .0344574  | .025 | .315     |
| creatmgdl_n  | 166 | .8609157 | .6013865  | .23  | 7.36     |
| glyceciagl_n | 170 | .8556471 | .0775352  | .7   | 1.1      |
| hbgdl_n      | 170 | 13.38294 | 1.821763  | 7.4  | 18.2     |

---

```
-> phenotypes = SS
```

| Variable     | Obs | Mean     | Std. Dev. | Min     | Max      |
|--------------|-----|----------|-----------|---------|----------|
| ageyears     | 144 | 20.375   | 10.2274   | 4       | 57       |
| BMIkgm_n     | 128 | 19.09281 | 6.747755  | 11.2367 | 63.26531 |
| sbpmmhg      | 101 | 11.15842 | 1.294084  | 8       | 14       |
| dbpmmhg      | 101 | 6.940594 | 1.120908  | 4       | 11       |
| creatugl_n   | 152 | 1.081385 | .760092   | .155    | 6.785    |
| bunmgdl_n    | 143 | .071993  | .0473827  | .025    | .545     |
| creatmgdl_n  | 151 | .5930728 | .232938   | .13     | 1.58     |
| glyceciagl_n | 152 | .8507632 | .0898773  | .6      | 1.08     |
| hbgdl_n      | 148 | 8.535135 | 1.362364  | 5.1     | 12       |

```
.
```

```
ranksum ageyears, by(phenotypes)
```

Two-sample Wilcoxon rank-sum (Mann-Whitney) test

```
. ranksum ageyears, by(phenotypes)
```

Two-sample Wilcoxon rank-sum (Mann-Whitney) test

```
phenotypes  obs  rank sum  expected
```

```
AA non DT   168   32047   26292
```

```
SS    144   16781   22536
```

```
combined   312   48828   48828
```

```
unadjusted variance  631008.00
```

```
adjustment for ties  -549.25
```

```
adjusted variance   630458.75
```

```
Ho: ageyears(phenot~s==AA non DT) = ageyears(phenot~s==SS)
```

```
z = 7.248
```

```
Prob > z = 0.0000
```

```
. ranksum BMIkgm_n, by(phenotypes)
```

Two-sample Wilcoxon rank-sum (Mann-Whitney) test

| phenotypes | obs | rank sum | expected |
|------------|-----|----------|----------|
|------------|-----|----------|----------|

|           |     |       |       |
|-----------|-----|-------|-------|
| AA non DT | 162 | 28218 | 23571 |
|-----------|-----|-------|-------|

|    |     |       |       |
|----|-----|-------|-------|
| SS | 128 | 13977 | 18624 |
|----|-----|-------|-------|

|          |     |       |       |
|----------|-----|-------|-------|
| combined | 290 | 42195 | 42195 |
|----------|-----|-------|-------|

unadjusted variance 502848.00

adjustment for ties -3.83

adjusted variance 502844.17

Ho: BMIkgm\_n(phenot~s==AA non DT) = BMIkgm\_n(phenot~s==SS)

z = 6.553

Prob > z = 0.0000

```
. ranksum sbpmmhg, by(phenotypes)
```

Two-sample Wilcoxon rank-sum (Mann-Whitney) test

| phenotypes | obs | rank sum | expected |
|------------|-----|----------|----------|
|------------|-----|----------|----------|

|           |     |       |       |
|-----------|-----|-------|-------|
| AA non DT | 100 | 11250 | 10100 |
|-----------|-----|-------|-------|

|    |     |      |       |
|----|-----|------|-------|
| SS | 101 | 9051 | 10201 |
|----|-----|------|-------|

|          |     |       |       |
|----------|-----|-------|-------|
| combined | 201 | 20301 | 20301 |
|----------|-----|-------|-------|



unadjusted variance 170016.67

adjustment for ties -9423.15

adjusted variance 160593.52

Ho: sbpmmhg(phenot~s==AA non DT) = sbpmmhg(phenot~s==SS)

z = 2.870

Prob > z = 0.0041

. ranksum sbpmmhg, by(phenotypes)

Two-sample Wilcoxon rank-sum (Mann-Whitney) test

| phenotypes | obs | rank sum | expected |
|------------|-----|----------|----------|
|------------|-----|----------|----------|

|           |     |       |       |
|-----------|-----|-------|-------|
| AA non DT | 100 | 11250 | 10100 |
|-----------|-----|-------|-------|

|    |     |      |       |
|----|-----|------|-------|
| SS | 101 | 9051 | 10201 |
|----|-----|------|-------|

|          |     |       |       |
|----------|-----|-------|-------|
| combined | 201 | 20301 | 20301 |
|----------|-----|-------|-------|

unadjusted variance 170016.67

adjustment for ties -9423.15

adjusted variance 160593.52

Ho: sbpmmhg(phenot~s==AA non DT) = sbpmmhg(phenot~s==SS)

z = 2.870

Prob > z = 0.0041

```
. ranksum dbpmmhg, by(phenotypes)
```

Two-sample Wilcoxon rank-sum (Mann-Whitney) test

| phenotypes | obs | rank sum | expected |
|------------|-----|----------|----------|
|------------|-----|----------|----------|

|           |     |         |       |
|-----------|-----|---------|-------|
| AA non DT | 100 | 11127.5 | 10100 |
|-----------|-----|---------|-------|

|    |     |        |       |
|----|-----|--------|-------|
| SS | 101 | 9173.5 | 10201 |
|----|-----|--------|-------|

|          |     |       |       |
|----------|-----|-------|-------|
| combined | 201 | 20301 | 20301 |
|----------|-----|-------|-------|

unadjusted variance 170016.67

adjustment for ties -17618.97

adjusted variance 152397.69

Ho: dbpmmhg(phenot~s==AA non DT) = dbpmmhg(phenot~s==SS)

z = 2.632

Prob > z = 0.0085

```
. ranksum ugcrgg_n, by(phenotypes)
```

Two-sample Wilcoxon rank-sum (Mann-Whitney) test

| phenotypes | obs | rank sum | expected |
|------------|-----|----------|----------|
|------------|-----|----------|----------|

|           |     |         |       |
|-----------|-----|---------|-------|
| AA non DT | 176 | 25399.5 | 28864 |
|-----------|-----|---------|-------|

|    |     |         |       |
|----|-----|---------|-------|
| SS | 151 | 28228.5 | 24764 |
|----|-----|---------|-------|

|          |     |       |       |
|----------|-----|-------|-------|
| combined | 327 | 53628 | 53628 |
|----------|-----|-------|-------|

unadjusted variance 726410.67

adjustment for ties -117163.68

adjusted variance 609246.98

Ho: ugcrgg\_n(phenot~s==AA non DT) = ugcrgg\_n(phenot~s==SS)

z = -4.439

Prob > z = 0.0000

. ranksum uacrmgg\_n, by(phenotypes)

Two-sample Wilcoxon rank-sum (Mann-Whitney) test

| phenotypes | obs | rank sum | expected |
|------------|-----|----------|----------|
|------------|-----|----------|----------|

|           |     |       |         |
|-----------|-----|-------|---------|
| AA non DT | 173 | 18266 | 28112.5 |
|-----------|-----|-------|---------|

|    |     |       |         |
|----|-----|-------|---------|
| SS | 151 | 34384 | 24537.5 |
|----|-----|-------|---------|

|          |     |       |       |
|----------|-----|-------|-------|
| combined | 324 | 52650 | 52650 |
|----------|-----|-------|-------|

unadjusted variance 707497.92

adjustment for ties -0.12

adjusted variance 707497.79

Ho: uacrmg~n(phenot~s==AA non DT) = uacrmg~n(phenot~s==SS)

z = -11.706

Prob > z = 0.0000

```
. ranksum upcrmgg_n, by(phenotypes)
```

Two-sample Wilcoxon rank-sum (Mann-Whitney) test

| phenotypes | obs | rank sum | expected |
|------------|-----|----------|----------|
|------------|-----|----------|----------|

|           |     |       |       |
|-----------|-----|-------|-------|
| AA non DT | 173 | 19447 | 28026 |
|-----------|-----|-------|-------|

|    |     |       |       |
|----|-----|-------|-------|
| SS | 150 | 32879 | 24300 |
|----|-----|-------|-------|

|          |     |       |       |
|----------|-----|-------|-------|
| combined | 323 | 52326 | 52326 |
|----------|-----|-------|-------|

unadjusted variance 700650.00

adjustment for ties 0.00

adjusted variance 700650.00

Ho: upcrmg~n(phenot~s==AA non DT) = upcrmg~n(phenot~s==SS)

z = -10.249

Prob > z = 0.0000

```
. ranksum usg_n, by(phenotypes)
```

Two-sample Wilcoxon rank-sum (Mann-Whitney) test

| phenotypes | obs | rank sum | expected |
|------------|-----|----------|----------|
|------------|-----|----------|----------|

|           |     |       |       |
|-----------|-----|-------|-------|
| AA non DT | 154 | 32480 | 23716 |
|-----------|-----|-------|-------|

|    |     |       |       |
|----|-----|-------|-------|
| SS | 153 | 14798 | 23562 |
|----|-----|-------|-------|

|          |     |       |       |
|----------|-----|-------|-------|
| combined | 307 | 47278 | 47278 |
|----------|-----|-------|-------|

unadjusted variance 604758.00

adjustment for ties -4756.94

adjusted variance 600001.06

Ho: usg\_n(phenot~s==AA non DT) = usg\_n(phenot~s==SS)

z = 11.314

Prob > z = 0.0000

. ranksum gfr\_n, by(phenotypes)

Two-sample Wilcoxon rank-sum (Mann-Whitney) test

| phenotypes | obs | rank sum | expected |
|------------|-----|----------|----------|
|------------|-----|----------|----------|

|           |     |         |         |
|-----------|-----|---------|---------|
| AA non DT | 157 | 19370.5 | 22529.5 |
|-----------|-----|---------|---------|

|    |     |         |         |
|----|-----|---------|---------|
| SS | 129 | 21670.5 | 18511.5 |
|----|-----|---------|---------|

|          |     |       |       |
|----------|-----|-------|-------|
| combined | 286 | 41041 | 41041 |
|----------|-----|-------|-------|

unadjusted variance 484384.25

adjustment for ties -0.62

adjusted variance 484383.63

Ho: gfr\_n(phenot~s==AA non DT) = gfr\_n(phenot~s==SS)

z = -4.539

Prob > z = 0.0000

```
. ranksum creatugl_n, by(phenotypes)
```

Two-sample Wilcoxon rank-sum (Mann-Whitney) test

| phenotypes | obs | rank sum | expected |
|------------|-----|----------|----------|
|------------|-----|----------|----------|

|           |     |         |       |
|-----------|-----|---------|-------|
| AA non DT | 174 | 37568.5 | 28449 |
|-----------|-----|---------|-------|

|    |     |         |       |
|----|-----|---------|-------|
| SS | 152 | 15732.5 | 24852 |
|----|-----|---------|-------|

|          |     |       |       |
|----------|-----|-------|-------|
| combined | 326 | 53301 | 53301 |
|----------|-----|-------|-------|

unadjusted variance 720708.00

adjustment for ties -9.49

adjusted variance 720698.51

Ho:  $\text{creatu} \sim \text{n}(\text{phenot} \sim \text{s} == \text{AA non DT}) = \text{creatu} \sim \text{n}(\text{phenot} \sim \text{s} == \text{SS})$

z = 10.742

Prob > z = 0.0000

```
. ranksum bunmgdl_n, by(phenotypes)
```

Two-sample Wilcoxon rank-sum (Mann-Whitney) test

| phenotypes | obs | rank sum | expected |
|------------|-----|----------|----------|
|------------|-----|----------|----------|

|           |     |         |       |
|-----------|-----|---------|-------|
| AA non DT | 162 | 29446.5 | 24786 |
|-----------|-----|---------|-------|

|    |     |         |       |
|----|-----|---------|-------|
| SS | 143 | 17218.5 | 21879 |
|----|-----|---------|-------|

|          |     |       |       |
|----------|-----|-------|-------|
| combined | 305 | 46665 | 46665 |
|----------|-----|-------|-------|

unadjusted variance 590733.00

adjustment for ties -2732.22

adjusted variance 588000.78

Ho: bunmgd~n(phenot~s==AA non DT) = bunmgd~n(phenot~s==SS)

z = 6.078

Prob > z = 0.0000

. ranksum creatmgdl\_n, by(phenotypes)

Two-sample Wilcoxon rank-sum (Mann-Whitney) test

| phenotypes | obs | rank sum | expected |
|------------|-----|----------|----------|
|------------|-----|----------|----------|

|           |     |       |       |
|-----------|-----|-------|-------|
| AA non DT | 166 | 32277 | 26394 |
|-----------|-----|-------|-------|

|    |     |       |       |
|----|-----|-------|-------|
| SS | 151 | 18126 | 24009 |
|----|-----|-------|-------|

|          |     |       |       |
|----------|-----|-------|-------|
| combined | 317 | 50403 | 50403 |
|----------|-----|-------|-------|

unadjusted variance 664249.00

adjustment for ties -85.70

adjusted variance 664163.30

Ho: creatm~n(phenot~s==AA non DT) = creatm~n(phenot~s==SS)

z = 7.219

Prob > z = 0.0000

```
. ranksum glycehiagl_n, by(phenotypes)
```

Two-sample Wilcoxon rank-sum (Mann-Whitney) test

| phenotypes | obs | rank sum | expected |
|------------|-----|----------|----------|
|------------|-----|----------|----------|

|           |     |       |       |
|-----------|-----|-------|-------|
| AA non DT | 170 | 27766 | 27455 |
|-----------|-----|-------|-------|

|    |     |       |       |
|----|-----|-------|-------|
| SS | 152 | 24237 | 24548 |
|----|-----|-------|-------|

|          |     |       |       |
|----------|-----|-------|-------|
| combined | 322 | 52003 | 52003 |
|----------|-----|-------|-------|

unadjusted variance 695526.67

adjustment for ties -1138.73

adjusted variance 694387.94

Ho: glycem~n(phenot~s==AA non DT) = glycem~n(phenot~s==SS)

z = 0.373

Prob > z = 0.7090

```
. ranksum hbgdl_n, by(phenotypes)
```

Two-sample Wilcoxon rank-sum (Mann-Whitney) test

| phenotypes | obs | rank sum | expected |
|------------|-----|----------|----------|
|------------|-----|----------|----------|

|           |     |       |       |
|-----------|-----|-------|-------|
| AA non DT | 170 | 39132 | 27115 |
|-----------|-----|-------|-------|

|    |     |       |       |
|----|-----|-------|-------|
| SS | 148 | 11589 | 23606 |
|----|-----|-------|-------|

|          |     |       |       |
|----------|-----|-------|-------|
| combined | 318 | 50721 | 50721 |
|----------|-----|-------|-------|



unadjusted variance 668836.67

adjustment for ties -151.13

adjusted variance 668685.54

Ho: hbgdl\_n(phenot~s==AA non DT) = hbgdl\_n(phenot~s==SS)

z = 14.696

Prob > z = 0.0000

```
. tabulate sex phenotypes, chi2 column row
```

|                          |
|--------------------------|
| Key                      |
| <i>frequency</i>         |
| <i>row percentage</i>    |
| <i>column percentage</i> |

| SEX   | PHENOTYPES |        | Total  |
|-------|------------|--------|--------|
|       | AA non DT  | SS     |        |
| F     | 115        | 83     | 198    |
|       | 58.08      | 41.92  | 100.00 |
|       | 66.09      | 53.21  | 60.00  |
| M     | 59         | 73     | 132    |
|       | 44.70      | 55.30  | 100.00 |
|       | 33.91      | 46.79  | 40.00  |
| Total | 174        | 156    | 330    |
|       | 52.73      | 47.27  | 100.00 |
|       | 100.00     | 100.00 | 100.00 |

Pearson chi2(1) = 5.6917 Pr = 0.017

.

. tabulate ugcrmvg2g phenotypes, chi2 column row

|                          |
|--------------------------|
| Key                      |
| <i>frequency</i>         |
| <i>row percentage</i>    |
| <i>column percentage</i> |

| UGCR(mg/g) 2G | PHENOTYPES |        | Total  |
|---------------|------------|--------|--------|
|               | AA non DT  | SS     |        |
| UGCR<0,020    | 167        | 117    | 284    |
|               | 58.80      | 41.20  | 100.00 |
|               | 94.89      | 77.48  | 86.85  |
| UGCR≥0,020    | 9          | 34     | 43     |
|               | 20.93      | 79.07  | 100.00 |
|               | 5.11       | 22.52  | 13.15  |
| Total         | 176        | 151    | 327    |
|               | 53.82      | 46.18  | 100.00 |
|               | 100.00     | 100.00 | 100.00 |

Pearson chi2(1) = 21.5524 Pr = 0.000

. tabulate UACRmgg03030 2G phenotypes, chi2 column row

|                          |
|--------------------------|
| Key                      |
| <i>frequency</i>         |
| <i>row percentage</i>    |
| <i>column percentage</i> |

| UACR (mg/g) | PHENOTYPES             |                        | Total                   |
|-------------|------------------------|------------------------|-------------------------|
|             | AA non DT              | SS                     |                         |
| UACR < 30   | 163<br>65.20<br>94.22  | 87<br>34.80<br>57.62   | 250<br>100.00<br>77.16  |
| UACR ≥ 30   | 10<br>13.51<br>5.78    | 64<br>86.49<br>42.38   | 74<br>100.00<br>22.84   |
| Total       | 173<br>53.40<br>100.00 | 151<br>46.60<br>100.00 | 324<br>100.00<br>100.00 |

Pearson chi2(1) = 61.2982 Pr = 0.000

. tabulate upcrmvg200mgg2g phenotypes, chi2 column row

|                          |
|--------------------------|
| Key                      |
| <i>frequency</i>         |
| <i>row percentage</i>    |
| <i>column percentage</i> |

| UPCR (mg/g)<br>200mg/g 2G | PHENOTYPES |        | Total  |
|---------------------------|------------|--------|--------|
|                           | AA non DT  | SS     |        |
| UPCR > 200                | 8          | 59     | 67     |
|                           | 11.94      | 88.06  | 100.00 |
|                           | 4.62       | 39.33  | 20.74  |
| UPCR ≤ 200                | 165        | 91     | 256    |
|                           | 64.45      | 35.55  | 100.00 |
|                           | 95.38      | 60.67  | 79.26  |
| Total                     | 173        | 150    | 323    |
|                           | 53.56      | 46.44  | 100.00 |
|                           | 100.00     | 100.00 | 100.00 |

Pearson chi2(1) = 58.8723 Pr = 0.000

. tabulate glomerularproteinuriauacrupcrou5 phenotypes, chi2 column row

|                          |
|--------------------------|
| Key                      |
| <i>frequency</i>         |
| <i>row percentage</i>    |
| <i>column percentage</i> |

| Glomerular proteinuria (UACR/UPCR > ou = 59 %); physio ou patho (UPCR <, = ou > | PHENOTYPES           |                      | Total                  |
|---------------------------------------------------------------------------------|----------------------|----------------------|------------------------|
|                                                                                 | AA non DT            | SS                   |                        |
| PHYSIOLOGICAL                                                                   | 4<br>40.00<br>100.00 | 6<br>60.00<br>100.00 | 10<br>100.00<br>100.00 |
| Total                                                                           | 4<br>40.00<br>100.00 | 6<br>60.00<br>100.00 | 10<br>100.00<br>100.00 |

. tabulate tubularproteinuriauacrupcr59phys phenotypes, chi2 column row

|                          |
|--------------------------|
| Key                      |
| <i>frequency</i>         |
| <i>row percentage</i>    |
| <i>column percentage</i> |

| Tubular proteinuria (UACR/UPCR < 59%; physio ou patho (UPCR <, = ou > 200 mg/g) | PHENOTYPES             |                        | Total                   |
|---------------------------------------------------------------------------------|------------------------|------------------------|-------------------------|
|                                                                                 | AA non DT              | SS                     |                         |
| PATHOLOGICAL                                                                    | 8<br>11.94<br>4.73     | 59<br>88.06<br>40.97   | 67<br>100.00<br>21.41   |
| PHYSIOLOGICAL                                                                   | 161<br>65.45<br>95.27  | 85<br>34.55<br>59.03   | 246<br>100.00<br>78.59  |
| Total                                                                           | 169<br>53.99<br>100.00 | 144<br>46.01<br>100.00 | 313<br>100.00<br>100.00 |

Pearson chi2(1) = 60.6909 Pr = 0.000

. tabulate usg10102g phenotypes, chi2 column row

|                          |
|--------------------------|
| Key                      |
| <i>frequency</i>         |
| <i>row percentage</i>    |
| <i>column percentage</i> |

| USG 1,010 2G | PHENOTYPES |        | Total  |
|--------------|------------|--------|--------|
|              | AA non DT  | SS     |        |
| USG > 1,010  | 146        | 99     | 245    |
|              | 59.59      | 40.41  | 100.00 |
|              | 94.81      | 64.71  | 79.80  |
| USG ≤ 1,010  | 8          | 54     | 62     |
|              | 12.90      | 87.10  | 100.00 |
|              | 5.19       | 35.29  | 20.20  |
| Total        | 154        | 153    | 307    |
|              | 50.16      | 49.84  | 100.00 |
|              | 100.00     | 100.00 | 100.00 |

Pearson chi2(1) = 43.1426 Pr = 0.000

. tabulate gfr4g phenotypes, chi2 column row

|                          |
|--------------------------|
| Key                      |
| <i>frequency</i>         |
| <i>row percentage</i>    |
| <i>column percentage</i> |

| GFR 4G        | PHENOTYPES |        | Total  |
|---------------|------------|--------|--------|
|               | AA non DT  | SS     |        |
| GFR < 60      | 6          | 7      | 13     |
|               | 46.15      | 53.85  | 100.00 |
|               | 3.82       | 5.47   | 4.56   |
| GFR > 140     | 31         | 61     | 92     |
|               | 33.70      | 66.30  | 100.00 |
|               | 19.75      | 47.66  | 32.28  |
| GFR [60; 90[  | 35         | 14     | 49     |
|               | 71.43      | 28.57  | 100.00 |
|               | 22.29      | 10.94  | 17.19  |
| GFR [90; 140] | 85         | 46     | 131    |
|               | 64.89      | 35.11  | 100.00 |
|               | 54.14      | 35.94  | 45.96  |
| Total         | 157        | 128    | 285    |
|               | 55.09      | 44.91  | 100.00 |
|               | 100.00     | 100.00 | 100.00 |

Pearson chi2(3) = 27.8073 Pr = 0.000

Odds ratio

UGCR

. cci 34 9 117 167

|                 | Exposed        | Unexposed | Total                | Proportion Exposed |
|-----------------|----------------|-----------|----------------------|--------------------|
| Cases           | 34             | 9         | 43                   | 0.7907             |
| Controls        | 117            | 167       | 284                  | 0.4120             |
| Total           | 151            | 176       | 327                  | 0.4618             |
|                 | Point estimate |           | [95% Conf. Interval] |                    |
| Odds ratio      | 5.392213       |           | 2.407055             | 13.2154 (exact)    |
| Attr. frac. ex. | .8145474       |           | .5845546             | .9243307 (exact)   |
| Attr. frac. pop | .6440607       |           |                      |                    |

chi2(1) = 21.55 Pr>chi2 = 0.0000

UACR

. cci 64 10 87 163

|                 | Exposed        | Unexposed | Total                | Proportion Exposed |
|-----------------|----------------|-----------|----------------------|--------------------|
| Cases           | 64             | 10        | 74                   | 0.8649             |
| Controls        | 87             | 163       | 250                  | 0.3480             |
| Total           | 151            | 173       | 324                  | 0.4660             |
|                 | Point estimate |           | [95% Conf. Interval] |                    |
| Odds ratio      | 11.9908        |           | 5.707243             | 27.32816 (exact)   |
| Attr. frac. ex. | .9166028       |           | .824784              | .9634077 (exact)   |
| Attr. frac. pop | .7927375       |           |                      |                    |

chi2(1) = 61.30 Pr>chi2 = 0.0000

## UPCR

. cci 59 8 91 165

|                 | Exposed        | Unexposed | Total                | Proportion Exposed |
|-----------------|----------------|-----------|----------------------|--------------------|
| Cases           | 59             | 8         | 67                   | 0.8806             |
| Controls        | 91             | 165       | 256                  | 0.3555             |
| Total           | 150            | 173       | 323                  | 0.4644             |
|                 | Point estimate |           | [95% Conf. Interval] |                    |
| Odds ratio      | 13.37225       |           | 5.971085             | 33.58871 (exact)   |
| Attr. frac. ex. | .9252183       |           | .8325262             | .9702281 (exact)   |
| Attr. frac. pop | .8147445       |           |                      |                    |

chi2(1) = 58.87 Pr>chi2 = 0.0000

## Tubular proteinuria

. cci 59 8 85 161

|                 | Exposed        | Unexposed | Total                | Proportion Exposed |
|-----------------|----------------|-----------|----------------------|--------------------|
| Cases           | 59             | 8         | 67                   | 0.8806             |
| Controls        | 85             | 161       | 246                  | 0.3455             |
| Total           | 144            | 169       | 313                  | 0.4601             |
|                 | Point estimate |           | [95% Conf. Interval] |                    |
| Odds ratio      | 13.96912       |           | 6.216634             | 35.15126 (exact)   |
| Attr. frac. ex. | .9284135       |           | .8391412             | .9715515 (exact)   |
| Attr. frac. pop | .8175582       |           |                      |                    |

chi2(1) = 60.69 Pr>chi2 = 0.0000



USG

. cci 54 8 99 146

|                 | Exposed        | Unexposed | Total                | Proportion Exposed |
|-----------------|----------------|-----------|----------------------|--------------------|
| Cases           | 54             | 8         | 62                   | 0.8710             |
| Controls        | 99             | 146       | 245                  | 0.4041             |
| Total           | 153            | 154       | 307                  | 0.4984             |
|                 | Point estimate |           | [95% Conf. Interval] |                    |
| Odds ratio      | 9.954545       |           | 4.425615             | 25.11649 (exact)   |
| Attr. frac. ex. | .8995434       |           | .7740427             | .9601855 (exact)   |
| Attr. frac. pop | .7834733       |           |                      |                    |

chi2(1) = 43.14 Pr>chi2 = 0.0000

.

GFR < 60 ml/min/1.73m<sup>2</sup>

. cci 7 6 46 85

|                 | Exposed        | Unexposed | Total                | Proportion Exposed |
|-----------------|----------------|-----------|----------------------|--------------------|
| Cases           | 7              | 6         | 13                   | 0.5385             |
| Controls        | 46             | 85        | 131                  | 0.3511             |
| Total           | 53             | 91        | 144                  | 0.3681             |
|                 | Point estimate |           | [95% Conf. Interval] |                    |
| Odds ratio      | 2.155797       |           | .5787823             | 8.217766 (exact)   |
| Attr. frac. ex. | .5361345       |           | -.7277654            | .8783124 (exact)   |
| Attr. frac. pop | .2886878       |           |                      |                    |

chi2(1) = 1.78 Pr>chi2 = 0.1817

60 ≤ GFR < 90 ml/min/1.73m<sup>2</sup>

. cci 14 35 46 85

|                 | Exposed        | Unexposed | Total                | Proportion Exposed |
|-----------------|----------------|-----------|----------------------|--------------------|
| Cases           | 14             | 35        | 49                   | 0.2857             |
| Controls        | 46             | 85        | 131                  | 0.3511             |
| Total           | 60             | 120       | 180                  | 0.3333             |
|                 | Point estimate |           | [95% Conf. Interval] |                    |
| Odds ratio      | .7391304       |           | .3325266             | 1.58498 (exact)    |
| Prev. frac. ex. | .2608696       |           | -.5849803            | .6674734 (exact)   |
| Prev. frac. pop | .0916031       |           |                      |                    |

chi2(1) = 0.69 Pr>chi2 = 0.4072

GFR ≥ 140 ml/min/1.73m<sup>2</sup>

. cci 61 31 46 85

|                 | Exposed        | Unexposed | Total                | Proportion Exposed |
|-----------------|----------------|-----------|----------------------|--------------------|
| Cases           | 61             | 31        | 92                   | 0.6630             |
| Controls        | 46             | 85        | 131                  | 0.3511             |
| Total           | 107            | 116       | 223                  | 0.4798             |
|                 | Point estimate |           | [95% Conf. Interval] |                    |
| Odds ratio      | 3.636045       |           | 1.998956             | 6.640535 (exact)   |
| Attr. frac. ex. | .7249759       |           | .4997388             | .8494097 (exact)   |
| Attr. frac. pop | .4806905       |           |                      |                    |

chi2(1) = 21.06 Pr>chi2 = 0.0000

SS (n = 163)

| Variables                      | Median (min - max) or % (n) | 5 – 95eme percentiles | observations |
|--------------------------------|-----------------------------|-----------------------|--------------|
| <b>Anthropometric</b>          |                             |                       |              |
| Age (years)                    | 20 (4 - 57)                 | 6 - 38                | 144          |
| Female sex                     | 53.21% (83)                 |                       | 156          |
| BMI (kg/m <sup>2</sup> )       | 18 (11.24 – 33.71)          | 13.15 – 26.04         | 128          |
| SBP (mmHg)                     | 11 (8 - 14 )                | 9 - 14                | 101          |
| DBP (mmHg)                     | 7 (4 - 11)                  | 5 - 8                 | 101          |
| <b>Biochemical</b>             |                             |                       |              |
| Hb (g/dl)                      | 8.4 (5.1 – 13.6)            | 6.6 - 11              | 148          |
| Glucose Se, g/dl               | 85 (60 - 108)               | 71 - 101              | 152          |
| BUN, mg/dl                     | 6.5 (2.5 – 54.5)            | 4 – 10.5              | 143          |
| Creatinin Se, mg/dl            | 0.57 (0.13 – 1.58)          | 0.27 – 0.99           | 151          |
| Creatinine U, mg/dl            | 88 (16 - 679)               | 37 - 233              | 152          |
| GFR, ml/min/1.73m <sup>2</sup> | 136.96 (38.31 – 407.84)     | 58.51 -196.80         | 129          |
| UACR, mg/g                     | 25.67 (2.64 – 328.65)       | 6.86 – 122.63         | 151          |
| UPCR, mg/g                     | 156.67 (17.24 – 2957.84)    | 29.41 – 1388.76       | 150          |
| UGCR, g/g                      | 0.005 (0 – 7.37)            | 0 – 0.193             | 151          |
| USG                            | 1.012 (1.001 – 1.025)       | 1.007 - 1.020         | 153          |

AA non DT (n = 177)

| Variables                      | Median (min – max)or % (n) | 5 - 95eme percentiles | observations |
|--------------------------------|----------------------------|-----------------------|--------------|
| <b>Anthropometric</b>          |                            |                       |              |
| Age (years)                    | 29 (4 - 77)                | 10 - 61               | 168          |
| Female sex                     | 66.09% (115)               |                       | 174          |
| BMI (kg/m <sup>2</sup> )       | 22,38 (10.56 – 49.61)      | 13.52 – 34.02         | 162          |
| SBP (mmHg)                     | 12 (9 -16)                 | 10 - 14               | 100          |
| DBP (mmHg)                     | 7 (5 - 9)                  | 6 - 8                 | 100          |
| <b>Biochemical</b>             |                            |                       |              |
| Hb, g/dl                       | 13.3 (7.4 – 18.2)          | 10.2 – 16.2           | 170          |
| Glucose Se, g/dl               | 84 (70 - 110)              | 73 - 98               | 170          |
| BUN, mg/dl                     | 8 (2.5 – 31.5)             | 5 - 14                | 162          |
| Créatinine Se, mg/dl           | 0.78 (0.23 – 7.36)         | 0.38 – 1.4            | 166          |
| Créatinine U, mg/dl            | 227 (22 - 886)             | 76 - 486              | 174          |
| GFR, ml/min/1.73m <sup>2</sup> | 114.41 (10.85 – 200.37)    | 68.28 – 160.60        | 157          |
| UACR, mg/g                     | 6.52 (1.28 - 139.07)       | 2.62 – 32.43          | 173          |
| UPCR, mg/g                     | 44.74 (9.21 – 530.27)      | 15.07 - 181.48        | 173          |
| UGCR, g/g                      | 0 (0 – 0.052)              | 0 – 0.020             | 176          |
| USG                            | 1.02 (1.004 – 1.035)       | 1.010 – 1.028         | 154          |

|                          | SS (163)      | AA non DT (177) |         | SS (n = 45)  | AA non DT (n = 45) |         |
|--------------------------|---------------|-----------------|---------|--------------|--------------------|---------|
| Variables                | M±SD ou %(n)  | M±SD ou %(n)    | p-value | M±SD ou %(n) | M±SD ou %(n)       | p-value |
| <b>Anthropometric</b>    |               |                 |         |              |                    |         |
| Age (years)              | 20.375±10.227 | 32.089±15.345   | < 0.001 | 21.38±10.36  | 21.38±10.36        | 1       |
| Female sex               | 53.21%(83)    | 66.09%(115)     |         | 64.44%(29)   | 64.44%(29)         |         |
| Male sex                 | 46.79%(73)    | 33.91% (59)     | 0.017   | 35.56%(16)   | 35.56%(16)         | 1       |
| BMI (kg/m <sup>2</sup> ) | 19.09± 6.75   | 22.92±6.75      | < 0.001 | 19,63±7,48   | 21.50±6,76         | 0.079   |
| SBP (mmHg)               | 11.16±1,29    | 11.7±1.33       | 0.0041  | 11,23±1,16   | 11.82±1.01         | 0.076   |
| DBP (mmHg)               | 6.94±1.12     | 7.25±0.82       | 0.0085  | 7,23±1,06    | 7,35±0,79          | 0.396   |
| <b>Biochemical</b>       |               |                 |         |              |                    |         |
| Hb (g/dl)                | 8.57±1.47     | 13.38±1.82      | < 0.001 | 8,69±1,43    | 13.05±1.87         | < 0.001 |
| Glucose Se, g/dl         | 85±9          | 86±8            | 0.709   | 85±7         | 86±10              | 0.447   |
| BUN, mg/dl               | 7±4.5         | 9±3.5           | < 0.001 | 6.5±2        | 8.5±2.5            | 0.0003  |
| Créatinine Se, mg/dl     | 0.59±0.23     | 0.86±0.60       | < 0.001 | 0.58±0.21    | 0.75±0.32          | 0.0095  |

|                                        | SS (n = 163) | AA non DT (n = 177) |         |                     |
|----------------------------------------|--------------|---------------------|---------|---------------------|
| Variables                              | % (n)        | % (n)               | p-value | Odds ratio          |
| USG ≤ 1.010                            | 35.29% (54)  | 5.19% (8)           |         |                     |
| USG > 1.010                            | 64.71% (99)  | 94.81% (146)        | < 0.001 | 9.95 [4.43 – 25.12] |
| GFR ≥ 140 ml/min/1.73m <sup>2</sup>    | 47.66% (61)  | 19.75% (31)         | < 0.001 | 3.64 [2 – 6.64]     |
| GFR < 60 ml/min/1.73m <sup>2</sup>     | 5.47% (7)    | 3.82% (6)           | 0.182   |                     |
| GFR 60; 90[ ml/min/1.73m <sup>2</sup>  | 10.94 (14)   | 22.29% (35)         |         |                     |
| GFR 90; 140[ ml/min/1.73m <sup>2</sup> | 35.66% (46)  | 54.14% (85)         |         |                     |
| UACR ≥ 30 (mg/g)                       | 42.38% (64)  | 5.78% (10)          |         |                     |
| UACR < 30 (mg/g)                       | 57.62% (87)  | 94.22% (163)        |         | 11.99 [5.71; 27.33] |
| UPCR > 200 (mg/g)                      | 39.33% (59)  | 4.62% (8)           |         |                     |
| UPCR ≤ 200 (mg/g)                      | 60.67% (91)  | 95.38% (165)        | < 0.001 | 13.37 [5.97; 33.59] |
| Presence glomerular PU                 | 0            | 0                   |         |                     |
| Absence glomrular PU                   | 6            | 4                   | NA      | NA                  |
| Presence tubular PU                    | 40.97% (59)  | 4.73% (8)           |         |                     |
| Absence tubular PU                     | 59.03% (85)  | 95.27% (161)        | < 0.001 | 13.97 [6.22; 35.15] |
| UGCR ≥ 20 (mg/g)                       | 22.52% (34)  | 5.11% (9)           |         |                     |
| UGCR < 20 (g/g)                        | 77.48% (117) | 94.89% (167)        | < 0.001 | 5.39 [2.41 – 13.21] |

|                                         | SS (n = 45) | AA non DT (n = 45) |         |                        |
|-----------------------------------------|-------------|--------------------|---------|------------------------|
| Variables                               | % (n)       | % (n)              | p-value | Odds ratio             |
| USG ≤ 1.010                             | 35.71% (15) | 2.44 % (1)         |         |                        |
| USG > 1.010                             | 64.29% (27) | 97.56% (40)        | < 0.001 | 22.22 [2.98 - 958.10]  |
| GFR ≥ 140 ml/min/1.73m <sup>2</sup>     | 45.24% (19) | 21.43% (9)         | 0.049   | 2.73 [0.89 – 8.61]     |
| GFR < 60 ml/min/1.73m <sup>2</sup>      | 2,38% (1)   | 2,38% (1)          | 0,859   |                        |
| GFR [60; 90[ ml/min/1.73m <sup>2</sup>  | 11.90% (5)  | 23.81% (10)        |         |                        |
| GFR [90; 140[ ml/min/1.73m <sup>2</sup> | 40.48% (17) | 52.38% (22)        | 0.118   |                        |
| UACR ≥ 30 (mg/g)                        | 47.73% (21) | 8.89% (4)          |         |                        |
| UACR < 30 (mg/g)                        | 52.27% (23) | 91.11% (41)        | < 0.001 | 9.36 [2.64 – 41.02]    |
| UPCR > 200 (mg/g)                       | 37.21% (16) | 2.22% (1)          |         |                        |
| UPCR ≤ 200 (mg/g)                       | 62.79% (27) | 97.78% (44)        | <0.001  | 26.07 [3.54 – 1117.37] |
| Presence glomerular PU                  | 2           | 0                  |         |                        |
| Absence glomerular PU                   | 0           | 0                  | NA      | NA                     |
| Presence tubular PU                     | 39.02% (16) | 2.22% (1)          |         |                        |
| Absence tubular PU                      | 60.98% (25) | 97.78% (44)        | < 0.001 | 28.16 [3.80 – 1206.73] |
| UGCR ≥ 20 (mg/g)                        | 25% (11)    | 6.67% (3)          |         |                        |
| UGCR < 20 (mg/g)                        | 75% (33)    | 93.33% (42)        | 0.018   | 4.67 [1.09 – 27.69]    |
