# Supplementary material for: Biomarkers of sickle cell nephropathy in Senegal
Source: PubMed Central journal article supplement (PMC9678278; doi:10.1371/journal.pone.0273745), 2022-11-21
Supplement: pone.0273745.s003.pdf [file pone.0273745.s003.pdf]

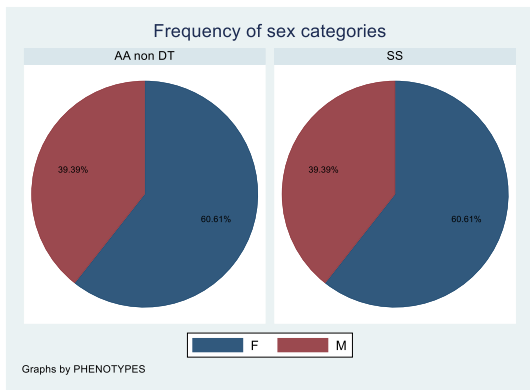

```
. by phenotypes, sort : summarize ageyears BMIkgm_n sbpmmhg dbpmmhg ugcrgg_n ua
> crmgg_n upcrmgg_n usg_n gfr_n creatugl_n bunmgdl_n creatmgdl_n glyceciagl_n h
> bgdl_n, detail
-> phenotypes = AA non DT
```

AGE (years)

| Percentiles | Smallest  |          |                     |
|-------------|-----------|----------|---------------------|
| 1%          | 9         | 9        |                     |
| 5%          | 10        | 10       |                     |
| 10%         | 11        | 10       | Obs      33         |
| 25%         | 18        | 11       | Sum of Wgt.      33 |
| 50%         | 23        |          | Mean      22.54545  |
| Largest     | Std. Dev. | 8.008163 |                     |

|     |    |    |          |          |
|-----|----|----|----------|----------|
| 75% | 28 | 33 |          |          |
| 90% | 33 | 34 | Variance | 64.13068 |
| 95% | 38 | 38 | Skewness | .0943275 |
| 99% | 38 | 38 | Kurtosis | 2.278591 |

BMI (kg/m<sup>2</sup>)

Percentiles Smallest

|     |          |          |             |    |
|-----|----------|----------|-------------|----|
| 1%  | 12.43512 | 12.43512 |             |    |
| 5%  | 13.51644 | 13.51644 |             |    |
| 10% | 14.75797 | 14.71607 | Obs         | 33 |
| 25% | 18.25632 | 14.75797 | Sum of Wgt. | 33 |

|     |          |  |      |          |
|-----|----------|--|------|----------|
| 50% | 20.08507 |  | Mean | 20.39841 |
|-----|----------|--|------|----------|

Largest Std. Dev. 3.836621

|     |          |          |          |          |
|-----|----------|----------|----------|----------|
| 75% | 22.22906 | 25.0995  |          |          |
| 90% | 25.0995  | 25.71101 | Variance | 14.71966 |
| 95% | 27.34375 | 27.34375 | Skewness | .0328783 |
| 99% | 28.76397 | 28.76397 | Kurtosis | 2.728547 |

SBP (mmHg)

Percentiles Smallest

|     |    |    |             |    |
|-----|----|----|-------------|----|
| 1%  | 10 | 10 |             |    |
| 5%  | 10 | 10 |             |    |
| 10% | 10 | 10 | Obs         | 18 |
| 25% | 11 | 11 | Sum of Wgt. | 18 |

|     |      |  |      |      |
|-----|------|--|------|------|
| 50% | 11.5 |  | Mean | 11.5 |
|-----|------|--|------|------|

Largest Std. Dev. 1.043185

|     |    |    |  |  |
|-----|----|----|--|--|
| 75% | 12 | 12 |  |  |
|-----|----|----|--|--|

|     |    |    |          |          |
|-----|----|----|----------|----------|
| 90% | 13 | 12 | Variance | 1.088235 |
| 95% | 14 | 13 | Skewness | .4798673 |
| 99% | 14 | 14 | Kurtosis | 3.162162 |

DBP (mmHg)

|             |           |   |             |           |
|-------------|-----------|---|-------------|-----------|
| Percentiles | Smallest  |   |             |           |
| 1%          | 6         | 6 |             |           |
| 5%          | 6         | 6 |             |           |
| 10%         | 6         | 6 | Obs         | 18        |
| 25%         | 7         | 7 | Sum of Wgt. | 18        |
| 50%         | 7         |   | Mean        | 7.277778  |
| Largest     | Std. Dev. |   |             | .7519039  |
| 75%         | 8         | 8 |             |           |
| 90%         | 8         | 8 | Variance    | .5653595  |
| 95%         | 8         | 8 | Skewness    | -.4834188 |
| 99%         | 8         | 8 | Kurtosis    | 1.990611  |

UGCR (g/g)

|             |           |          |             |          |
|-------------|-----------|----------|-------------|----------|
| Percentiles | Smallest  |          |             |          |
| 1%          | 0         | 0        |             |          |
| 5%          | 0         | 0        |             |          |
| 10%         | 0         | 0        | Obs         | 33       |
| 25%         | 0         | 0        | Sum of Wgt. | 33       |
| 50%         | 0         |          | Mean        | .0031708 |
| Largest     | Std. Dev. |          |             | .0058618 |
| 75%         | .0053677  | .007874  |             |          |
| 90%         | .007874   | .0111732 | Variance    | .0000344 |

|     |          |          |          |          |
|-----|----------|----------|----------|----------|
| 95% | .0169823 | .0169823 | Skewness | 2.454482 |
| 99% | .0265306 | .0265306 | Kurtosis | 9.331335 |

UACR (mg/g)

Percentiles Smallest

|         |          |           |             |          |
|---------|----------|-----------|-------------|----------|
| 1%      | 2.264541 | 2.264541  |             |          |
| 5%      | 2.828077 | 2.828077  |             |          |
| 10%     | 3.960262 | 3.053645  | Obs         | 33       |
| 25%     | 4.652908 | 3.960262  | Sum of Wgt. | 33       |
| 50%     | 6.540037 |           | Mean        | 8.412291 |
| Largest |          | Std. Dev. | 6.386419    |          |
| 75%     | 10.29653 | 15.67753  |             |          |
| 90%     | 15.67753 | 15.79863  | Variance    | 40.78635 |
| 95%     | 15.83182 | 15.83182  | Skewness    | 2.947096 |
| 99%     | 37.23676 | 37.23676  | Kurtosis    | 13.66117 |

UPCR (mg/g)

Percentiles Smallest

|         |          |           |             |          |
|---------|----------|-----------|-------------|----------|
| 1%      | 12.81172 | 12.81172  |             |          |
| 5%      | 14.09593 | 14.09593  |             |          |
| 10%     | 15.52824 | 15.32479  | Obs         | 33       |
| 25%     | 23.92432 | 15.52824  | Sum of Wgt. | 33       |
| 50%     | 44.88189 |           | Mean        | 50.27348 |
| Largest |          | Std. Dev. | 37.55449    |          |
| 75%     | 56.31241 | 78.10909  |             |          |
| 90%     | 78.10909 | 84.64842  | Variance    | 1410.34  |
| 95%     | 168.1685 | 168.1685  | Skewness    | 2.141075 |
| 99%     | 179.7414 | 179.7414  | Kurtosis    | 7.897913 |

## USG

Percentiles    Smallest

1%    1.009    1.009

5%    1.014    1.014

10%   1.0155    1.015    Obs            30

25%   1.019    1.016    Sum of Wgt.    30

50%   1.021            Mean            1.021433

Largest    Std. Dev.    .0050629

75%   1.025    1.028

90%   1.029    1.03    Variance    .0000256

95%   1.03    1.03    Skewness    -.1156152

99%   1.03    1.03    Kurtosis    2.805458

## GFR

Percentiles    Smallest

1%   10.85409    10.85409

5%   69.10343    69.10343

10%   71.64286    70.44782    Obs            31

25%   84.58118    71.64286    Sum of Wgt.    31

50%   118.9363            Mean            111.4806

Largest    Std. Dev.    34.25112

75%   131.9849    151.8054

90%   151.8054    151.8266    Variance    1173.139

95%   156.0566    156.0566    Skewness    -.5373998

99%   186.2326    186.2326    Kurtosis    3.966406

Creat U (g/l)

| Percentiles | Smallest  |         |             |          |
|-------------|-----------|---------|-------------|----------|
| 1%          | .221      | .221    |             |          |
| 5%          | .895      | .895    |             |          |
| 10%         | 1.375     | 1.27    | Obs         | 33       |
| 25%         | 1.7655    | 1.375   | Sum of Wgt. | 33       |
| 50%         | 2.32      |         | Mean        | 2.685621 |
| Largest     | Std. Dev. | 1.37534 |             |          |
| 75%         | 3.6505    | 4.519   |             |          |
| 90%         | 4.519     | 4.9     | Variance    | 1.891559 |
| 95%         | 5.8025    | 5.8025  | Skewness    | .6459609 |
| 99%         | 5.8885    | 5.8885  | Kurtosis    | 2.829917 |

BUN (mg/dl)

| Percentiles | Smallest  |          |             |          |
|-------------|-----------|----------|-------------|----------|
| 1%          | .04       | .04      |             |          |
| 5%          | .04       | .04      |             |          |
| 10%         | .0525     | .05      | Obs         | 30       |
| 25%         | .06       | .055     | Sum of Wgt. | 30       |
| 50%         | .0775     |          | Mean        | .092     |
| Largest     | Std. Dev. | .0519881 |             |          |
| 75%         | .12       | .125     |             |          |
| 90%         | .13       | .135     | Variance    | .0027028 |
| 95%         | .155      | .155     | Skewness    | 2.715881 |
| 99%         | .315      | .315     | Kurtosis    | 12.32795 |

Creat (mg/dl)

| Percentiles | Smallest  |          |             |          |
|-------------|-----------|----------|-------------|----------|
| 1%          | .302      | .302     |             |          |
| 5%          | .37       | .37      |             |          |
| 10%         | .54       | .528     | Obs         | 31       |
| 25%         | .63       | .54      | Sum of Wgt. | 31       |
| 50%         | .764      |          | Mean        | .9789355 |
| Largest     | Std. Dev. | 1.209671 |             |          |
| 75%         | .916      | 1.016    |             |          |
| 90%         | 1.016     | 1.23     | Variance    | 1.463304 |
| 95%         | 1.592     | 1.592    | Skewness    | 4.955128 |
| 99%         | 7.36      | 7.36     | Kurtosis    | 26.68203 |

Glycemia (g/l)

| Percentiles | Smallest  |          |             |          |
|-------------|-----------|----------|-------------|----------|
| 1%          | .71       | .71      |             |          |
| 5%          | .78       | .78      |             |          |
| 10%         | .8        | .79      | Obs         | 32       |
| 25%         | .825      | .8       | Sum of Wgt. | 32       |
| 50%         | .86       |          | Mean        | .8671875 |
| Largest     | Std. Dev. | .0645198 |             |          |
| 75%         | .915      | .94      |             |          |
| 90%         | .94       | .97      | Variance    | .0041628 |
| 95%         | .97       | .97      | Skewness    | .090122  |
| 99%         | 1.02      | 1.02     | Kurtosis    | 3.108538 |

### Hb (g/dl)

| Percentiles |      | Smallest |             |           |
|-------------|------|----------|-------------|-----------|
| 1%          | 8    | 8        |             |           |
| 5%          | 8.8  | 8.8      |             |           |
| 10%         | 11   | 10.5     | Obs         | 33        |
| 25%         | 12.5 | 11       | Sum of Wgt. | 33        |
| 50%         | 13.4 |          | Mean        | 13.42121  |
| Largest     |      |          | Std. Dev.   | 2.067268  |
| 75%         | 14.7 | 15.8     |             |           |
| 90%         | 15.8 | 15.8     | Variance    | 4.273598  |
| 95%         | 16.8 | 16.8     | Skewness    | -.3889819 |
| 99%         | 18.2 | 18.2     | Kurtosis    | 3.89207   |

-> phenotypes = SS

### AGE (years)

| Percentiles |    | Smallest |             |          |
|-------------|----|----------|-------------|----------|
| 1%          | 9  | 9        |             |          |
| 5%          | 10 | 10       |             |          |
| 10%         | 11 | 10       | Obs         | 33       |
| 25%         | 18 | 11       | Sum of Wgt. | 33       |
| 50%         | 23 |          | Mean        | 22.54545 |
| Largest     |    |          | Std. Dev.   | 8.008163 |
| 75%         | 28 | 33       |             |          |
| 90%         | 33 | 34       | Variance    | 64.13068 |
| 95%         | 38 | 38       | Skewness    | .0943275 |
| 99%         | 38 | 38       | Kurtosis    | 2.278591 |



BMI (kg/m<sup>2</sup>)

Percentiles    Smallest

|     |          |          |             |    |
|-----|----------|----------|-------------|----|
| 1%  | 13.41713 | 13.41713 |             |    |
| 5%  | 14.10911 | 14.10911 |             |    |
| 10% | 15.95046 | 15.15063 | Obs         | 32 |
| 25% | 17.01145 | 15.95046 | Sum of Wgt. | 32 |

|     |          |  |      |          |
|-----|----------|--|------|----------|
| 50% | 19.30129 |  | Mean | 19.26732 |
|-----|----------|--|------|----------|

Largest    Std. Dev.    3.157103

|     |          |          |          |          |
|-----|----------|----------|----------|----------|
| 75% | 20.89646 | 22.59814 |          |          |
| 90% | 22.59814 | 24.60938 | Variance | 9.967297 |
| 95% | 26.03749 | 26.03749 | Skewness | .4985016 |
| 99% | 27.0538  | 27.0538  | Kurtosis | 3.159224 |

SBP (mmHg)

Percentiles    Smallest

|     |    |    |             |    |
|-----|----|----|-------------|----|
| 1%  | 9  | 9  |             |    |
| 5%  | 9  | 9  |             |    |
| 10% | 10 | 10 | Obs         | 25 |
| 25% | 10 | 10 | Sum of Wgt. | 25 |

|     |    |  |      |       |
|-----|----|--|------|-------|
| 50% | 11 |  | Mean | 11.24 |
|-----|----|--|------|-------|

Largest    Std. Dev.    1.3

|     |    |    |          |          |
|-----|----|----|----------|----------|
| 75% | 12 | 12 |          |          |
| 90% | 13 | 13 | Variance | 1.69     |
| 95% | 14 | 14 | Skewness | .3571476 |
| 99% | 14 | 14 | Kurtosis | 2.890171 |

DBP (mmHg)

| Percentiles | Smallest  |          |             |          |
|-------------|-----------|----------|-------------|----------|
| 1%          | 6         | 6        |             |          |
| 5%          | 6         | 6        |             |          |
| 10%         | 6         | 6        | Obs         | 25       |
| 25%         | 6         | 6        | Sum of Wgt. | 25       |
| 50%         | 7         |          | Mean        | 7.28     |
| Largest     | Std. Dev. | 1.173314 |             |          |
| 75%         | 8         | 8        |             |          |
| 90%         | 8         | 8        | Variance    | 1.376667 |
| 95%         | 9         | 9        | Skewness    | 1.176777 |
| 99%         | 11        | 11       | Kurtosis    | 5.06675  |

UGCR (g/g)

| Percentiles | Smallest  |          |             |          |
|-------------|-----------|----------|-------------|----------|
| 1%          | 0         | 0        |             |          |
| 5%          | 0         | 0        |             |          |
| 10%         | 0         | 0        | Obs         | 33       |
| 25%         | 0         | 0        | Sum of Wgt. | 33       |
| 50%         | 0         |          | Mean        | .0103467 |
| Largest     | Std. Dev. | .0160249 |             |          |
| 75%         | .0128755  | .04329   |             |          |
| 90%         | .04329    | .0434783 | Variance    | .0002568 |
| 95%         | .045977   | .045977  | Skewness    | 1.419197 |
| 99%         | .0502513  | .0502513 | Kurtosis    | 3.581099 |

UACR (mg/g)

Percentiles    Smallest

|         |           |          |             |          |
|---------|-----------|----------|-------------|----------|
| 1%      | 4.697987  | 4.697987 |             |          |
| 5%      | 7.036011  | 7.036011 |             |          |
| 10%     | 8.887545  | 7.557604 | Obs         | 33       |
| 25%     | 13.56725  | 8.887545 | Sum of Wgt. | 33       |
| 50%     | 29.95671  |          | Mean        | 45.83054 |
| Largest | Std. Dev. | 53.52857 |             |          |
| 75%     | 46.66667  | 106.1943 |             |          |
| 90%     | 106.1943  | 127.4227 | Variance    | 2865.308 |
| 95%     | 208.2902  | 208.2902 | Skewness    | 2.309506 |
| 99%     | 233.7209  | 233.7209 | Kurtosis    | 7.937022 |

UPCR (mg/g)

Percentiles    Smallest

|         |           |          |             |          |
|---------|-----------|----------|-------------|----------|
| 1%      | 22.80702  | 22.80702 |             |          |
| 5%      | 28.73563  | 28.73563 |             |          |
| 10%     | 42.68456  | 34.48276 | Obs         | 33       |
| 25%     | 67.2956   | 42.68456 | Sum of Wgt. | 33       |
| 50%     | 127.9592  |          | Mean        | 305.9612 |
| Largest | Std. Dev. | 645.4784 |             |          |
| 75%     | 193.7736  | 452.2156 |             |          |
| 90%     | 452.2156  | 623.0303 | Variance    | 416642.4 |
| 95%     | 2716.279  | 2716.279 | Skewness    | 3.464901 |
| 99%     | 2804.145  | 2804.145 | Kurtosis    | 13.51046 |

USG

Percentiles    Smallest

|     |       |       |             |    |
|-----|-------|-------|-------------|----|
| 1%  | 1.001 | 1.001 |             |    |
| 5%  | 1.006 | 1.006 |             |    |
| 10% | 1.01  | 1.01  | Obs         | 33 |
| 25% | 1.01  | 1.01  | Sum of Wgt. | 33 |

|     |       |  |      |       |
|-----|-------|--|------|-------|
| 50% | 1.012 |  | Mean | 1.012 |
|-----|-------|--|------|-------|

|         |           |          |  |  |
|---------|-----------|----------|--|--|
| Largest | Std. Dev. | .0036486 |  |  |
|---------|-----------|----------|--|--|

|     |       |       |          |           |
|-----|-------|-------|----------|-----------|
| 75% | 1.015 | 1.016 |          |           |
| 90% | 1.016 | 1.017 | Variance | .0000133  |
| 95% | 1.02  | 1.02  | Skewness | -.1881634 |
| 99% | 1.02  | 1.02  | Kurtosis | 4.659889  |

GFR

Percentiles    Smallest

|     |          |          |             |    |
|-----|----------|----------|-------------|----|
| 1%  | 94.91754 | 94.91754 |             |    |
| 5%  | 102.8286 | 102.8286 |             |    |
| 10% | 114.2953 | 103.4025 | Obs         | 33 |
| 25% | 131.0035 | 114.2953 | Sum of Wgt. | 33 |

|     |          |  |      |          |
|-----|----------|--|------|----------|
| 50% | 154.0836 |  | Mean | 156.7991 |
|-----|----------|--|------|----------|

|         |           |          |  |  |
|---------|-----------|----------|--|--|
| Largest | Std. Dev. | 34.87621 |  |  |
|---------|-----------|----------|--|--|

|     |          |          |          |          |
|-----|----------|----------|----------|----------|
| 75% | 177.4106 | 196.7909 |          |          |
| 90% | 196.7909 | 202.1034 | Variance | 1216.35  |
| 95% | 226.4839 | 226.4839 | Skewness | .3342351 |
| 99% | 241.192  | 241.192  | Kurtosis | 2.755685 |

Creat U (g/l)

| Percentiles | Smallest  |          |                   |
|-------------|-----------|----------|-------------------|
| 1%          | .485      | .485     |                   |
| 5%          | .49       | .49      |                   |
| 10%         | .53       | .494     | Obs 33            |
| 25%         | .795      | .53      | Sum of Wgt. 33    |
| 50%         | .995      |          | Mean 1.083879     |
| Largest     | Std. Dev. | .4497871 |                   |
| 75%         | 1.2405    | 1.63     |                   |
| 90%         | 1.63      | 1.805    | Variance .2023084 |
| 95%         | 2.175     | 2.175    | Skewness 1.021337 |
| 99%         | 2.33      | 2.33     | Kurtosis 3.815897 |

BUN (mg/dl)

| Percentiles | Smallest  |          |                   |
|-------------|-----------|----------|-------------------|
| 1%          | .03       | .03      |                   |
| 5%          | .04       | .04      |                   |
| 10%         | .04       | .04      | Obs 33            |
| 25%         | .05       | .04      | Sum of Wgt. 33    |
| 50%         | .06       |          | Mean .0704545     |
| Largest     | Std. Dev. | .0385552 |                   |
| 75%         | .08       | .105     |                   |
| 90%         | .105      | .105     | Variance .0014865 |
| 95%         | .105      | .105     | Skewness 3.1657   |
| 99%         | .25       | .25      | Kurtosis 15.36144 |

Creat (mg/dl)

| Percentiles | Smallest  |          |                   |
|-------------|-----------|----------|-------------------|
| 1%          | .25       | .25      |                   |
| 5%          | .25       | .25      |                   |
| 10%         | .31       | .31      | Obs 33            |
| 25%         | .358      | .31      | Sum of Wgt. 33    |
| 50%         | .49       |          | Mean .4934848     |
| Largest     | Std. Dev. | .1711808 |                   |
| 75%         | .57       | .77      |                   |
| 90%         | .77       | .8       | Variance .0293029 |
| 95%         | .88       | .88      | Skewness .7366546 |
| 99%         | .88       | .88      | Kurtosis 2.841606 |

Glycemia (g/l)

| Percentiles | Smallest  |          |                   |
|-------------|-----------|----------|-------------------|
| 1%          | .71       | .71      |                   |
| 5%          | .72       | .72      |                   |
| 10%         | .77       | .76      | Obs 33            |
| 25%         | .79       | .77      | Sum of Wgt. 33    |
| 50%         | .85       |          | Mean .8487879     |
| Largest     | Std. Dev. | .0761067 |                   |
| 75%         | .89       | .94      |                   |
| 90%         | .94       | .97      | Variance .0057922 |
| 95%         | 1.01      | 1.01     | Skewness .3125784 |
| 99%         | 1.01      | 1.01     | Kurtosis 2.551114 |

Hb (g/dl)

| Percentiles | Smallest  |          |             |          |
|-------------|-----------|----------|-------------|----------|
| 1%          | 6.6       | 6.6      |             |          |
| 5%          | 6.7       | 6.7      |             |          |
| 10%         | 6.8       | 6.8      | Obs         | 29       |
| 25%         | 7.4       | 6.8      | Sum of Wgt. | 29       |
| 50%         | 8.3       |          | Mean        | 8.337931 |
| Largest     | Std. Dev. | 1.142183 |             |          |
| 75%         | 8.9       | 9.5      |             |          |
| 90%         | 10        | 10       | Variance    | 1.304581 |
| 95%         | 10.4      | 10.4     | Skewness    | .3639535 |
| 99%         | 11        | 11       | Kurtosis    | 2.495134 |

```
. by phenotypes, sort : summarize ageyears BMIkgm_n sbpmmhg dbpmmhg creatugl_n
> bunmgdl_n creatmgdl_n glyceciagl_n hbgdl_n
```

```
-> phenotypes = AA non DT
```

| Variable     | Obs | Mean     | Std. Dev. | Min      | Max      |
|--------------|-----|----------|-----------|----------|----------|
| ageyears     | 33  | 22.54545 | 8.008163  | 9        | 38       |
| BMIkgm_n     | 33  | 20.39841 | 3.836621  | 12.43512 | 28.76397 |
| sbpmmhg      | 18  | 11.5     | 1.043185  | 10       | 14       |
| dbpmmhg      | 18  | 7.277778 | .7519039  | 6        | 8        |
| creatugl_n   | 33  | 2.685621 | 1.37534   | .221     | 5.8885   |
| bunmgdl_n    | 30  | .092     | .0519881  | .04      | .315     |
| creatmgdl_n  | 31  | .9789355 | 1.209671  | .302     | 7.36     |
| glyceciagl_n | 32  | .8671875 | .0645198  | .71      | 1.02     |
| hbgdl_n      | 33  | 13.42121 | 2.067268  | 8        | 18.2     |

```
-> phenotypes = SS
```

| Variable     | Obs | Mean     | Std. Dev. | Min      | Max     |
|--------------|-----|----------|-----------|----------|---------|
| ageyears     | 33  | 22.54545 | 8.008163  | 9        | 38      |
| BMIkgm_n     | 32  | 19.26732 | 3.157103  | 13.41713 | 27.0538 |
| sbpmmhg      | 25  | 11.24    | 1.3       | 9        | 14      |
| dbpmmhg      | 25  | 7.28     | 1.173314  | 6        | 11      |
| creatugl_n   | 33  | 1.083879 | .4497871  | .485     | 2.33    |
| bunmgdl_n    | 33  | .0704545 | .0385552  | .03      | .25     |
| creatmgdl_n  | 33  | .4934848 | .1711808  | .25      | .88     |
| glyceciagl_n | 33  | .8487879 | .0761067  | .71      | 1.01    |
| hbgdl_n      | 29  | 8.337931 | 1.142183  | 6.6      | 11      |

```
.
. ranksum ageyears, by(phenotypes)
```

Two-sample Wilcoxon rank-sum (Mann-Whitney) test

```
phenotypes  obs  rank sum  expected
```

```
AA non DT   33   1105.5  1105.5
```

```
SS          33   1105.5  1105.5
```



combined 66 2211 2211

unadjusted variance 6080.25

adjustment for ties -23.48

adjusted variance 6056.77

Ho: ageyears(phenot~s==AA non DT) = ageyears(phenot~s==SS)

z = 0.000

Prob > z = 1.0000

. ranksum BMIkgm\_n, by(phenotypes)

Two-sample Wilcoxon rank-sum (Mann-Whitney) test

| phenotypes | obs | rank sum | expected |
|------------|-----|----------|----------|
|------------|-----|----------|----------|

|           |    |      |      |
|-----------|----|------|------|
| AA non DT | 33 | 1196 | 1089 |
|-----------|----|------|------|

|    |    |     |      |
|----|----|-----|------|
| SS | 32 | 949 | 1056 |
|----|----|-----|------|

|          |    |      |      |
|----------|----|------|------|
| combined | 65 | 2145 | 2145 |
|----------|----|------|------|

unadjusted variance 5808.00

adjustment for ties -0.13

adjusted variance 5807.87

Ho: BMIkgm\_n(phenot~s==AA non DT) = BMIkgm\_n(phenot~s==SS)

z = 1.404

Prob > z = 0.1603

```
. ranksum sbpmmhg, by(phenotypes)
```

Two-sample Wilcoxon rank-sum (Mann-Whitney) test

| phenotypes | obs | rank sum | expected |
|------------|-----|----------|----------|
|------------|-----|----------|----------|

|           |    |       |     |
|-----------|----|-------|-----|
| AA non DT | 18 | 426.5 | 396 |
|-----------|----|-------|-----|

|    |    |       |     |
|----|----|-------|-----|
| SS | 25 | 519.5 | 550 |
|----|----|-------|-----|

|          |    |     |     |
|----------|----|-----|-----|
| combined | 43 | 946 | 946 |
|----------|----|-----|-----|

unadjusted variance 1650.00

adjustment for ties -124.58

adjusted variance 1525.42

Ho: sbpmmhg(phenot~s==AA non DT) = sbpmmhg(phenot~s==SS)

z = 0.781

Prob > z = 0.4349

```
. ranksum dbpmmhg, by(phenotypes)
```

Two-sample Wilcoxon rank-sum (Mann-Whitney) test

| phenotypes | obs | rank sum | expected |
|------------|-----|----------|----------|
|------------|-----|----------|----------|

|           |    |       |     |
|-----------|----|-------|-----|
| AA non DT | 18 | 410.5 | 396 |
|-----------|----|-------|-----|

|    |    |       |     |
|----|----|-------|-----|
| SS | 25 | 535.5 | 550 |
|----|----|-------|-----|

|          |    |     |     |
|----------|----|-----|-----|
| combined | 43 | 946 | 946 |
|----------|----|-----|-----|

unadjusted variance 1650.00

adjustment for ties -175.04

adjusted variance 1474.96

Ho: dbpmmhg(phenot~s==AA non DT) = dbpmmhg(phenot~s==SS)

z = 0.378

Prob > z = 0.7058

. ranksum creatugl\_n, by(phenotypes)

Two-sample Wilcoxon rank-sum (Mann-Whitney) test

| phenotypes | obs | rank sum | expected |
|------------|-----|----------|----------|
|------------|-----|----------|----------|

|           |    |      |        |
|-----------|----|------|--------|
| AA non DT | 33 | 1547 | 1105.5 |
|-----------|----|------|--------|

|    |    |     |        |
|----|----|-----|--------|
| SS | 33 | 664 | 1105.5 |
|----|----|-----|--------|

|          |    |      |      |
|----------|----|------|------|
| combined | 66 | 2211 | 2211 |
|----------|----|------|------|

unadjusted variance 6080.25

adjustment for ties -0.13

adjusted variance 6080.12

Ho: creatu~n(phenot~s==AA non DT) = creatu~n(phenot~s==SS)

z = 5.662

Prob > z = 0.0000

```
. ranksum bunmgdl_n, by(phenotypes)
```

Two-sample Wilcoxon rank-sum (Mann-Whitney) test

| phenotypes | obs | rank sum | expected |
|------------|-----|----------|----------|
|------------|-----|----------|----------|

|           |    |      |     |
|-----------|----|------|-----|
| AA non DT | 30 | 1134 | 960 |
|-----------|----|------|-----|

|    |    |     |      |
|----|----|-----|------|
| SS | 33 | 882 | 1056 |
|----|----|-----|------|

|          |    |      |      |
|----------|----|------|------|
| combined | 63 | 2016 | 2016 |
|----------|----|------|------|

unadjusted variance 5280.00

adjustment for ties -37.76

adjusted variance 5242.24

Ho: bunmgd~n(phenot~s==AA non DT) = bunmgd~n(phenot~s==SS)

z = 2.403

Prob > z = 0.0163

```
. ranksum creatmgdl_n, by(phenotypes)
```

Two-sample Wilcoxon rank-sum (Mann-Whitney) test

| phenotypes | obs | rank sum | expected |
|------------|-----|----------|----------|
|------------|-----|----------|----------|

|           |    |      |        |
|-----------|----|------|--------|
| AA non DT | 31 | 1350 | 1007.5 |
|-----------|----|------|--------|

|    |    |     |        |
|----|----|-----|--------|
| SS | 33 | 730 | 1072.5 |
|----|----|-----|--------|

|          |    |      |      |
|----------|----|------|------|
| combined | 64 | 2080 | 2080 |
|----------|----|------|------|

unadjusted variance 5541.25

adjustment for ties -3.81

adjusted variance 5537.44

Ho: creatm~n(phenot~s==AA non DT) = creatm~n(phenot~s==SS)

z = 4.603

Prob > z = 0.0000

. ranksum glyceciagl\_n, by(phenotypes)

Two-sample Wilcoxon rank-sum (Mann-Whitney) test

| phenotypes | obs | rank sum | expected |
|------------|-----|----------|----------|
|------------|-----|----------|----------|

|           |    |        |      |
|-----------|----|--------|------|
| AA non DT | 32 | 1143.5 | 1056 |
|-----------|----|--------|------|

|    |    |        |      |
|----|----|--------|------|
| SS | 33 | 1001.5 | 1089 |
|----|----|--------|------|

|          |    |      |      |
|----------|----|------|------|
| combined | 65 | 2145 | 2145 |
|----------|----|------|------|

unadjusted variance 5808.00

adjustment for ties -19.04

adjusted variance 5788.96

Ho: glycem~n(phenot~s==AA non DT) = glycem~n(phenot~s==SS)

z = 1.150

Prob > z = 0.2501

```
. ranksum hbgdl_n, by(phenotypes)
```

Two-sample Wilcoxon rank-sum (Mann-Whitney) test

| phenotypes | obs | rank sum | expected |
|------------|-----|----------|----------|
|------------|-----|----------|----------|

|           |    |        |        |
|-----------|----|--------|--------|
| AA non DT | 33 | 1488.5 | 1039.5 |
|-----------|----|--------|--------|

|    |    |       |       |
|----|----|-------|-------|
| SS | 29 | 464.5 | 913.5 |
|----|----|-------|-------|

|          |    |      |      |
|----------|----|------|------|
| combined | 62 | 1953 | 1953 |
|----------|----|------|------|

unadjusted variance 5024.25

adjustment for ties -3.04

adjusted variance 5021.21

Ho: hbgdl\_n(phenot~s==AA non DT) = hbgdl\_n(phenot~s==SS)

z = 6.336

Prob > z = 0.0000

. tabulate sex phenotypes, chi2 column row

|                          |
|--------------------------|
| Key                      |
| <i>frequency</i>         |
| <i>row percentage</i>    |
| <i>column percentage</i> |

| SEX   | PHENOTYPES |        | Total  |
|-------|------------|--------|--------|
|       | AA non DT  | SS     |        |
| F     | 20         | 20     | 40     |
|       | 50.00      | 50.00  | 100.00 |
|       | 60.61      | 60.61  | 60.61  |
| M     | 13         | 13     | 26     |
|       | 50.00      | 50.00  | 100.00 |
|       | 39.39      | 39.39  | 39.39  |
| Total | 33         | 33     | 66     |
|       | 50.00      | 50.00  | 100.00 |
|       | 100.00     | 100.00 | 100.00 |

Pearson chi2(1) = 0.0000 Pr = 1.000

. tabulate ugcr2g phenotypes, chi2 column row

|                          |
|--------------------------|
| Key                      |
| <i>frequency</i>         |
| <i>row percentage</i>    |
| <i>column percentage</i> |

| UGCR(g/g) 2G | PHENOTYPES |        | Total  |
|--------------|------------|--------|--------|
|              | AA non DT  | SS     |        |
| UGCR<0,020   | 32         | 26     | 58     |
|              | 55.17      | 44.83  | 100.00 |
|              | 96.97      | 78.79  | 87.88  |
| UGCR≥0,020   | 1          | 7      | 8      |
|              | 12.50      | 87.50  | 100.00 |
|              | 3.03       | 21.21  | 12.12  |
| Total        | 33         | 33     | 66     |
|              | 50.00      | 50.00  | 100.00 |
|              | 100.00     | 100.00 | 100.00 |

Pearson chi2(1) = 5.1207 Pr = 0.024



. tabulate UACRmgg03030 2G phenotypes, chi2 column row

|                          |
|--------------------------|
| Key                      |
| <i>frequency</i>         |
| <i>row percentage</i>    |
| <i>column percentage</i> |

| UACR (mg/g)<br>]0;<br>30[[30;+<br>] 2G | PHENOTYPES |        | Total  |
|----------------------------------------|------------|--------|--------|
|                                        | AA non DT  | SS     |        |
| UACR < 30                              | 32         | 17     | 49     |
|                                        | 65.31      | 34.69  | 100.00 |
|                                        | 96.97      | 51.52  | 74.24  |
| UACR ≥ 30                              | 1          | 16     | 17     |
|                                        | 5.88       | 94.12  | 100.00 |
|                                        | 3.03       | 48.48  | 25.76  |
| Total                                  | 33         | 33     | 66     |
|                                        | 50.00      | 50.00  | 100.00 |
|                                        | 100.00     | 100.00 | 100.00 |

Pearson chi2(1) = 17.8271 Pr = 0.000

. tabulate upcrmgg200mgg2g phenotypes, chi2 column row

|                          |
|--------------------------|
| Key                      |
| <i>frequency</i>         |
| <i>row percentage</i>    |
| <i>column percentage</i> |

| UPCR (mg/g)<br>200mg/g 2G | PHENOTYPES |        | Total  |
|---------------------------|------------|--------|--------|
|                           | AA non DT  | SS     |        |
| UPCR > 200                | 0          | 7      | 7      |
|                           | 0.00       | 100.00 | 100.00 |
|                           | 0.00       | 21.21  | 10.61  |
| UPCR ≤ 200                | 33         | 26     | 59     |
|                           | 55.93      | 44.07  | 100.00 |
|                           | 100.00     | 78.79  | 89.39  |
| Total                     | 33         | 33     | 66     |
|                           | 50.00      | 50.00  | 100.00 |
|                           | 100.00     | 100.00 | 100.00 |

Pearson chi2(1) = 7.8305 Pr = 0.005

. tabulate glomerularproteinuriauacrucrou5 phenotypes, chi2 column row

|                          |
|--------------------------|
| Key                      |
| <i>frequency</i>         |
| <i>row percentage</i>    |
| <i>column percentage</i> |

| Glomerular proteinuria (UACR/UPCR > ou = 59 %); physio ou patho (UPCR <, = ou > | PHENOTYPES |  | Total  |
|---------------------------------------------------------------------------------|------------|--|--------|
|                                                                                 | SS         |  |        |
| PHYSIOLOGICAL                                                                   | 3          |  | 3      |
|                                                                                 | 100.00     |  | 100.00 |
|                                                                                 | 100.00     |  | 100.00 |
| Total                                                                           | 3          |  | 3      |
|                                                                                 | 100.00     |  | 100.00 |
|                                                                                 | 100.00     |  | 100.00 |

. tabulate tubularproteinuriauacrucpr59phys phenotypes, chi2 column row

|                          |
|--------------------------|
| Key                      |
| <i>frequency</i>         |
| <i>row percentage</i>    |
| <i>column percentage</i> |

| Tubular proteinuria (UACR/UPCR < 59%; physio ou patho (UPCR <, = ou > 200 mg/g) | PHENOTYPES |        | Total  |
|---------------------------------------------------------------------------------|------------|--------|--------|
|                                                                                 | AA non DT  | SS     |        |
| PATHOLOGICAL                                                                    | 0          | 7      | 7      |
|                                                                                 | 0.00       | 100.00 | 100.00 |
|                                                                                 | 0.00       | 23.33  | 11.11  |
| PHYSIOLOGICAL                                                                   | 33         | 23     | 56     |
|                                                                                 | 58.93      | 41.07  | 100.00 |
|                                                                                 | 100.00     | 76.67  | 88.89  |
| Total                                                                           | 33         | 30     | 63     |
|                                                                                 | 52.38      | 47.62  | 100.00 |
|                                                                                 | 100.00     | 100.00 | 100.00 |

Pearson chi2(1) = 8.6625 Pr = 0.003

. tabulate usg10102g phenotypes, chi2 column row

|                                                                       |
|-----------------------------------------------------------------------|
| Key                                                                   |
| <i>frequency</i><br><i>row percentage</i><br><i>column percentage</i> |

| USG 1,010 2G | PHENOTYPES |        | Total  |
|--------------|------------|--------|--------|
|              | AA non DT  | SS     |        |
| USG > 1,010  | 29         | 19     | 48     |
|              | 60.42      | 39.58  | 100.00 |
|              | 96.67      | 57.58  | 76.19  |
| USG ≤ 1,010  | 1          | 14     | 15     |
|              | 6.67       | 93.33  | 100.00 |
|              | 3.33       | 42.42  | 23.81  |
| Total        | 30         | 33     | 63     |
|              | 47.62      | 52.38  | 100.00 |
|              | 100.00     | 100.00 | 100.00 |

Pearson chi2(1) = 13.2372 Pr = 0.000

. tabulate gfr4g phenotypes, chi2 column row

|                                                                       |
|-----------------------------------------------------------------------|
| Key                                                                   |
| <i>frequency</i><br><i>row percentage</i><br><i>column percentage</i> |

| GFR 4G        | PHENOTYPES |        | Total  |
|---------------|------------|--------|--------|
|               | AA non DT  | SS     |        |
| GFR < 60      | 1          | 0      | 1      |
|               | 100.00     | 0.00   | 100.00 |
|               | 3.23       | 0.00   | 1.56   |
| GFR > 140     | 5          | 22     | 27     |
|               | 18.52      | 81.48  | 100.00 |
|               | 16.13      | 66.67  | 42.19  |
| GFR [60; 90[  | 7          | 0      | 7      |
|               | 100.00     | 0.00   | 100.00 |
|               | 22.58      | 0.00   | 10.94  |
| GFR [90; 140] | 18         | 11     | 29     |
|               | 62.07      | 37.93  | 100.00 |
|               | 58.06      | 33.33  | 45.31  |
| Total         | 31         | 33     | 64     |
|               | 48.44      | 51.56  | 100.00 |
|               | 100.00     | 100.00 | 100.00 |

Pearson chi2(3) = 20.3507 Pr = 0.000

### Odds ratio

#### UGCR

. cci 7 1 26 32

|                 | Exposed        | Unexposed | Total                | Proportion Exposed |
|-----------------|----------------|-----------|----------------------|--------------------|
| Cases           | 7              | 1         | 8                    | 0.8750             |
| Controls        | 26             | 32        | 58                   | 0.4483             |
| Total           | 33             | 33        | 66                   | 0.5000             |
|                 | Point estimate |           | [95% Conf. Interval] |                    |
| Odds ratio      | 8.615385       |           | .9759941             | 400.0794 (exact)   |
| Attr. frac. ex. | .8839286       |           | -.0245963            | .9975005 (exact)   |
| Attr. frac. pop | .7734375       |           |                      |                    |

chi2(1) = 5.12 Pr>chi2 = 0.0236

#### UACR

. cci 16 1 17 32

|                 | Exposed        | Unexposed | Total                | Proportion Exposed |
|-----------------|----------------|-----------|----------------------|--------------------|
| Cases           | 16             | 1         | 17                   | 0.9412             |
| Controls        | 17             | 32        | 49                   | 0.3469             |
| Total           | 33             | 33        | 66                   | 0.5000             |
|                 | Point estimate |           | [95% Conf. Interval] |                    |
| Odds ratio      | 30.11765       |           | 3.845026             | 1301.021 (exact)   |
| Attr. frac. ex. | .9667969       |           | .7399238             | .9992314 (exact)   |
| Attr. frac. pop | .9099265       |           |                      |                    |

chi2(1) = 17.83 Pr>chi2 = 0.0000

UPCR

. cci 7 0 26 33

|                 | Exposed        | Unexposed | Total                | Proportion Exposed |
|-----------------|----------------|-----------|----------------------|--------------------|
| Cases           | 7              | 0         | 7                    | 1.0000             |
| Controls        | 26             | 33        | 59                   | 0.4407             |
| Total           | 33             | 33        | 66                   | 0.5000             |
|                 | Point estimate |           | [95% Conf. Interval] |                    |
| Odds ratio      | .              |           | 2.181938             | . (Cornfield)      |
| Attr. frac. ex. | .              |           | .5416918             | . (Cornfield)      |
| Attr. frac. pop | .              |           |                      |                    |

chi2(1) = 7.83 Pr>chi2 = 0.0051

Odds ratio (UPCR) with correction adding 0.5 in each cell

. cci 15 1 53 67

|                 | Exposed        | Unexposed | Total                | Proportion Exposed |
|-----------------|----------------|-----------|----------------------|--------------------|
| Cases           | 15             | 1         | 16                   | 0.9375             |
| Controls        | 53             | 67        | 120                  | 0.4417             |
| Total           | 68             | 68        | 136                  | 0.5000             |
|                 | Point estimate |           | [95% Conf. Interval] |                    |
| Odds ratio      | 18.96226       |           | 2.705018             | 809.7447 (exact)   |
| Attr. frac. ex. | .9472637       |           | .6303168             | .998765 (exact)    |
| Attr. frac. pop | .8880597       |           |                      |                    |

chi2(1) = 13.88 Pr>chi2 = 0.0002

### Tubular proteinuria

. cci 7 0 23 33

|                 | Exposed        | Unexposed | Total                | Proportion Exposed |
|-----------------|----------------|-----------|----------------------|--------------------|
| Cases           | 7              | 0         | 7                    | 1.0000             |
| Controls        | 23             | 33        | 56                   | 0.4107             |
| Total           | 30             | 33        | 63                   | 0.4762             |
|                 | Point estimate |           | [95% Conf. Interval] |                    |
| Odds ratio      | .              |           | 2.455869             | . (Cornfield)      |
| Attr. frac. ex. | .              |           | .5928121             | . (Cornfield)      |
| Attr. frac. pop | .              |           |                      |                    |

chi2(1) = 8.66 Pr>chi2 = 0.0032

### Odds ratio (tubular proteinuria) with correction adding 0.5 in each cell

. cci 15 1 47 67

|                 | Exposed        | Unexposed | Total                | Proportion Exposed |
|-----------------|----------------|-----------|----------------------|--------------------|
| Cases           | 15             | 1         | 16                   | 0.9375             |
| Controls        | 47             | 67        | 114                  | 0.4123             |
| Total           | 62             | 68        | 130                  | 0.4769             |
|                 | Point estimate |           | [95% Conf. Interval] |                    |
| Odds ratio      | 21.38298       |           | 3.032232             | 913.0947 (exact)   |
| Attr. frac. ex. | .9532338       |           | .67021               | .9989048 (exact)   |
| Attr. frac. pop | .8936567       |           |                      |                    |

chi2(1) = 15.51 Pr>chi2 = 0.0001

.

USG

. cci 14 1 19 29

|                 | Exposed        | Unexposed | Total                | Proportion Exposed |
|-----------------|----------------|-----------|----------------------|--------------------|
| Cases           | 14             | 1         | 15                   | 0.9333             |
| Controls        | 19             | 29        | 48                   | 0.3958             |
| Total           | 33             | 30        | 63                   | 0.5238             |
|                 | Point estimate |           | [95% Conf. Interval] |                    |
| Odds ratio      | 21.36842       |           | 2.702454             | 933.6841 (exact)   |
| Attr. frac. ex. | .953202        |           | .6299659             | .998929 (exact)    |
| Attr. frac. pop | .8896552       |           |                      |                    |

chi2(1) = 13.24 Pr>chi2 = 0.0003

GFR < 60 ml/min/1.73m<sup>2</sup>

. cci 0 1 11 18

|                 | Exposed        | Unexposed | Total                | Proportion Exposed |
|-----------------|----------------|-----------|----------------------|--------------------|
| Cases           | 0              | 1         | 1                    | 0.0000             |
| Controls        | 11             | 18        | 29                   | 0.3793             |
| Total           | 11             | 19        | 30                   | 0.3667             |
|                 | Point estimate |           | [95% Conf. Interval] |                    |
| Odds ratio      | 0              |           | 0                    | . (Cornfield)      |
| Prev. frac. ex. | 1              |           | .                    | 1 (Cornfield)      |
| Prev. frac. pop | .              |           |                      |                    |

chi2(1) = 0.60 Pr>chi2 = 0.4390

Odds ratio (GFR < 60 ml/min/1.73m<sup>2</sup>) with correction adding 0.5 in each cell

. cci 1 3 23 37

|                 | Exposed        | Unexposed | Total                | Proportion Exposed |
|-----------------|----------------|-----------|----------------------|--------------------|
| Cases           | 1              | 3         | 4                    | 0.2500             |
| Controls        | 23             | 37        | 60                   | 0.3833             |
| Total           | 24             | 40        | 64                   | 0.3750             |
|                 | Point estimate |           | [95% Conf. Interval] |                    |
| Odds ratio      | .5362319       |           | .0097951             | 7.209443 (exact)   |
| Prev. frac. ex. | .4637681       |           | -6.209443            | .9902049 (exact)   |
| Prev. frac. pop | .1777778       |           |                      |                    |

chi2(1) = 0.28 Pr>chi2 = 0.5938

60 ≤ GFR < 90 ml/min/1.73m<sup>2</sup>

. cci 7 0 11 18

|                 | Exposed        | Unexposed | Total                | Proportion Exposed |
|-----------------|----------------|-----------|----------------------|--------------------|
| Cases           | 7              | 0         | 7                    | 1.0000             |
| Controls        | 11             | 18        | 29                   | 0.3793             |
| Total           | 18             | 18        | 36                   | 0.5000             |
|                 | Point estimate |           | [95% Conf. Interval] |                    |
| Odds ratio      | .              |           | 2.642669             | . (Cornfield)      |
| Attr. frac. ex. | .              |           | .6215947             | . (Cornfield)      |
| Attr. frac. pop | .              |           |                      |                    |

chi2(1) = 8.69 Pr>chi2 = 0.0032



Odds ratio (GFR < 60 ml/min/1.73m<sup>2</sup>) with correction adding 0.5 in each cell

. cci 15 1 47 67

|                 | Exposed        | Unexposed | Total                | Proportion Exposed |
|-----------------|----------------|-----------|----------------------|--------------------|
| Cases           | 15             | 1         | 16                   | 0.9375             |
| Controls        | 47             | 67        | 114                  | 0.4123             |
| Total           | 62             | 68        | 130                  | 0.4769             |
|                 | Point estimate |           | [95% Conf. Interval] |                    |
| Odds ratio      | 21.38298       |           | 3.032232             | 913.0947 (exact)   |
| Attr. frac. ex. | .9532338       |           | .67021               | .9989048 (exact)   |
| Attr. frac. pop | .8936567       |           |                      |                    |

chi2(1) = 15.51 Pr>chi2 = 0.0001

GFR > 140 ml/min/1.73m<sup>2</sup>

. cci 22 5 11 18

|                 | Exposed        | Unexposed | Total                | Proportion Exposed |
|-----------------|----------------|-----------|----------------------|--------------------|
| Cases           | 22             | 5         | 27                   | 0.8148             |
| Controls        | 11             | 18        | 29                   | 0.3793             |
| Total           | 33             | 23        | 56                   | 0.5893             |
|                 | Point estimate |           | [95% Conf. Interval] |                    |
| Odds ratio      | 7.2            |           | 1.852659             | 30.61573 (exact)   |
| Attr. frac. ex. | .8611111       |           | .4602354             | .967337 (exact)    |
| Attr. frac. pop | .7016461       |           |                      |                    |

chi2(1) = 10.96 Pr>chi2 = 0.0009
